# Supplementary material for: Biologically guided isolation and ADMET profile of new factor Xa inhibitors from Glycyrrhiza glabra roots using in vitro and in silico approaches
Source: PubMed Central journal article supplement — RSC Adv. 2021 Mar 9;11(17):9995–10001. doi: 10.1039/d1ra00359c (PMC8695410; doi:10.1039/d1ra00359c), 2021-03-09
Supplement: RA-011-D1RA00359C-s001.pdf [file RA-011-D1RA00359C-s001.pdf]

**Biologically guided isolation and ADMET profile of new Factor Xa inhibitors from *Glycyrrhiza glabra* roots using *in-vitro* and *in-silico* approaches**

Reham S. Ibrahim, <sup>\*a</sup>, Rahma SR. Mahrous, <sup>a</sup> Rasha M. Abu EL-Khair, <sup>a</sup>  
Samir A. Ross, <sup>b,c</sup> Abdallah A. Omar <sup>a</sup> and Hoda M. Fathy <sup>a</sup>

<sup>a</sup>Department of Pharmacognosy, Faculty of Pharmacy, Alexandria, Egypt;

<sup>b</sup>National Center for Natural Products Research, University of Mississippi, Thad Cochran Research Center, Oxford, MS, USA;

<sup>c</sup>BioMolecular Sciences, Division of Pharmacognosy, School of Pharmacy, University of Mississippi, University, MS, USA

\*Corresponding author. E-mail: rehamsaid84@yahoo.com,

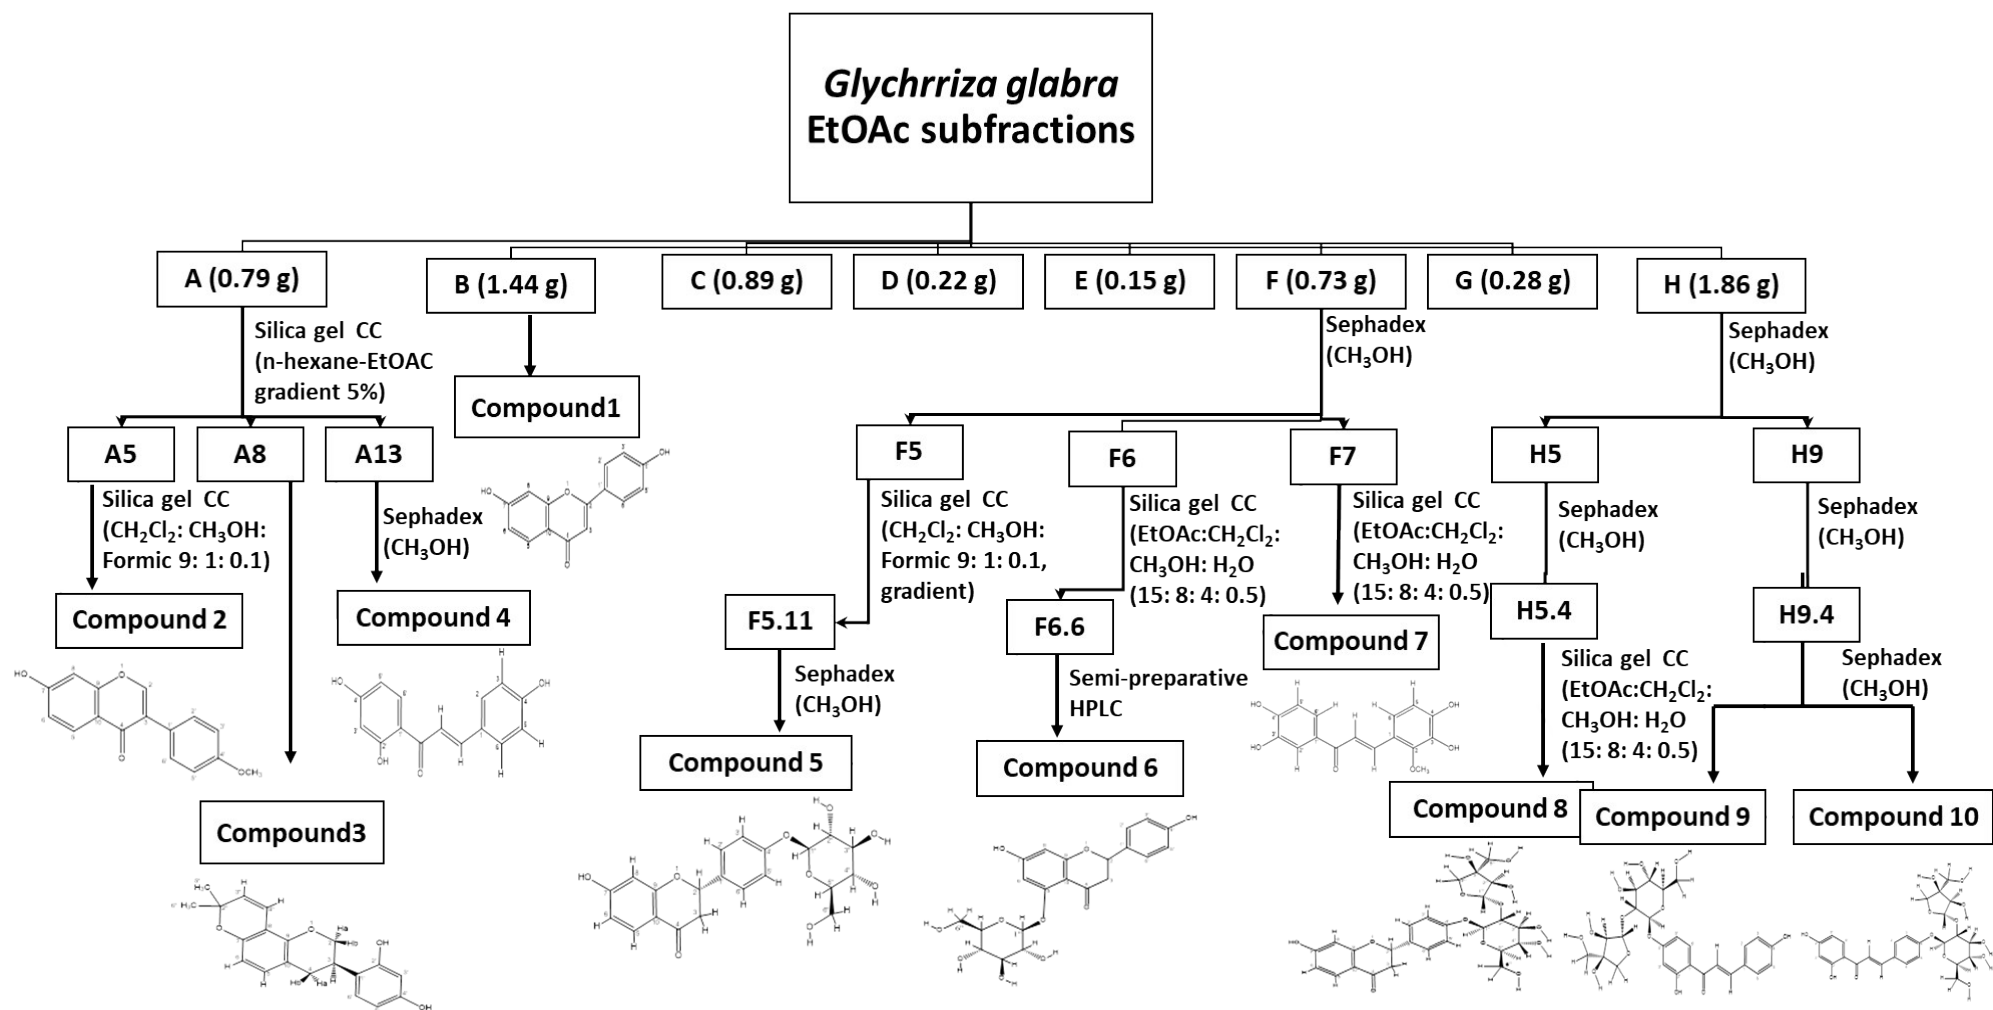

**Fig. S1** Scheme for the isolation of 10 compounds from EtOAc subfractions of the roots of *G. glabra*

**Table S1. % inhibition of different fractions of *G. glabra* roots extract on FXa\***

| Fraction                        | Concentration (mg/ml) | % Inhibition (%)   |
|---------------------------------|-----------------------|--------------------|
| Light petroleum                 | 1.5                   | 1.55±0.056         |
|                                 | 3                     | 0.69±0.083         |
| CH <sub>2</sub> Cl <sub>2</sub> | 1.5                   | 62.31±0.097        |
|                                 | 3                     | 71.94±0.034        |
| EtOAc                           | 1.5                   | 87.26±0.034        |
|                                 | <b>3</b>              | <b>97.93±0.019</b> |
| n-BuOH                          | 1.5                   | 13.08±0.095        |
|                                 | 3                     | 21.51±0.04         |
| Rivaroxaban (positive control)  | 100 nM                | 88.64±0.76         |

\* Inhibition rate was expressed as mean±SD, n=2

**Table S2. *In-vitro* % inhibition of EtOAc subfractions of *G. glabra* on FXa enzyme**

| Subfraction#<br>(1 mg/ml) | % inhibition |
|---------------------------|--------------|
| (A)                       | 60.94±1.18   |
| (B)                       | 61.03±1.99   |
| (C)                       | 63.85±0.18   |
| (D)                       | 65.64±0.45   |
| (E)                       | 77.66±0.66   |
| (F)                       | 84.94±0.82   |
| (G)                       | 76±0.87      |
| (H)                       | 77.39±0.46   |

# Subfractions are arranged according to polarities from the least polar; A to the most polar; H

\* Inhibition rate was expressed as mean±SD, n=2



Table S3. continued

| $\delta H$ (J in Hz)                    |     |     |     |                                                         |                                      |                                                   |          |     |     |                                           |                                                  |
|-----------------------------------------|-----|-----|-----|---------------------------------------------------------|--------------------------------------|---------------------------------------------------|----------|-----|-----|-------------------------------------------|--------------------------------------------------|
| Position                                | (1) | (2) | (3) | (5)                                                     | (6)                                  | (8)                                               | Position | (4) | (7) | (9)                                       | (10)                                             |
| <b>- <math>\beta</math> -Glu moiety</b> |     |     |     |                                                         |                                      | <b>- <math>\beta</math> -Glu moiety</b>           |          |     |     |                                           |                                                  |
| 1"                                      | -   | -   | -   | 4.94, d (7.94)                                          | 4.75, d (7.2)                        | 5.00, d (7.47)                                    | 1"       | -   | -   | 5.09, d (6.1)                             | 5.05, d (7.33)                                   |
| 2"                                      | -   | -   | -   | 3.43- 3.47, m                                           | 3.53, m                              | 3.66, m                                           | 2"       | -   | -   | 3.67, m                                   | 3.67, m                                          |
| 3"                                      | -   | -   | -   | 3.43- 3.47, m                                           | 3.44, m                              | 3.66, m                                           | 3"       | -   | -   | 3.49, m                                   | 3.49, m                                          |
| 4"                                      | -   | -   | -   | 3.43- 3.47, m                                           | 3.65, s                              | 3.40- 3.44, m                                     | 4"       | -   | -   | 3.43, m                                   | 3.42, m                                          |
| 5"                                      | -   | -   | -   | 3.43- 3.47, m                                           | 3.49                                 | 3.40- 3.44, m                                     | 5"       | -   | -   | 3.98, d (1.58)                            | 3.97, d (1.62)                                   |
| 6"                                      | -   | -   | -   | Ha: 3.70, dd (12.05, 5.44)<br>Hb: 3.90, d (11.90, 2.07) | Ha: 3.67, t (12)<br>Hb: 3.92, t (11) | Ha: 3.70, m (12.13)<br>Hb: 3.89, dd (12.17, 2.17) | 6"       | -   | -   | Ha: 3.73, m<br>Hb: 3.91, d (12.23)        | Ha: 3.71, m<br>Hb: 3.91, d (12.18)               |
| <b>- <math>\beta</math> -Api moiety</b> |     |     |     |                                                         |                                      | <b>- <math>\beta</math> -Api moiety</b>           |          |     |     |                                           |                                                  |
| 1'''                                    | -   | -   | -   | -                                                       | -                                    | 5.48, d (1.47)                                    | 1'''     | -   | -   | 5.48, dd (5.23, 1.62)                     | 5.47, dd (5.66, 1.62)                            |
| 2'''                                    | -   | -   | -   | -                                                       | -                                    | 3.96, d (1.52)                                    | 2'''     | -   | -   | 3.67, m                                   | 3.67, m                                          |
| 3'''                                    | -   | -   | -   | -                                                       | -                                    | -                                                 | 3'''     | -   | -   | -                                         | -                                                |
| 4'''                                    | -   | -   | -   | -                                                       | -                                    | Ha: 3.80, d (9.53)<br>Hb: 4.06, d (9.60)          | 4'''     | -   | -   | Ha: 3.82, d (9.56)<br>Hb: 4.05, t (10.15) | Ha: 3.81, d (9.59)<br>Hb: 4.05, dd (11.76, 9.61) |
| 5'''                                    | -   | -   | -   | -                                                       | -                                    | 3.55, d (2.50)                                    | 5'''     | -   | -   | 3.55, d (2.17)                            | 3.55, d (2.17)                                   |

**Table S4. <sup>13</sup>C-NMR spectral data of compounds (1- 10),  $\delta$  values in ppm**

| $\delta$ C (ppm)                        |        |        |        |        |        |        |                                         |        |        |        |        |
|-----------------------------------------|--------|--------|--------|--------|--------|--------|-----------------------------------------|--------|--------|--------|--------|
| Position                                | (1)    | (2)    | (3)    | (5)    | (6)    | (8)    | Position                                | (4)    | (7)    | (9)    | (10)   |
| 2                                       | 162.70 | 153.45 | 69.98  | 80.85  | 79.98  | 80.89  | C- $\alpha$                             | 118.54 | 120.77 | 117.94 | 120.17 |
| 3                                       | 104.49 | 124.86 | 31.46  | 45.11  | 46.47  | 45.06  | C- $\beta$                              | 145.72 | 141.09 | 146.52 | 144.94 |
| 4                                       | 176.39 | 175.77 | 30.38  | 193.35 | 192.59 | 193.36 | C=O                                     | 193.74 | 191.65 | 194.02 | 193.48 |
| 5                                       | 126.50 | 128.53 | 129.09 | 130.01 | 162.94 | 130.02 | 1                                       | 128.01 | 121.63 | 127.82 | 130.61 |
| 6                                       | 114.89 | 115.75 | 108.78 | 112.04 | 102.06 | 112.00 | 2, 6                                    | 131.96 | 150.07 | 132.15 | 131.57 |
| 7                                       | 162.53 | 163.34 | 151.53 | 167.11 | 164.97 | 166.99 | 3, 5                                    | 117.10 | 139.84 | 117.09 | 117.93 |
| 8                                       | 102.51 | 103.21 | 109.94 | 104.01 | 100.96 | 103.99 | 4                                       | 161.68 | 150.90 | 161.81 | 161.02 |
| 9                                       | 157.44 | 158.77 | 149.58 | 165.55 | 166.84 | 165.53 | 5                                       | 117.10 | 112.90 | 117.09 | 117.93 |
| 10                                      | 116.09 | 118.59 | 114.65 | 115.08 | 103.90 | 115.10 | 6                                       | 131.96 | 120.55 | 132.15 | 131.57 |
| 1'                                      | 121.82 | 125.63 | 120.04 | 134.58 | 131.58 | 134.48 | 1'                                      | 114.71 | 131.98 | 116.67 | 114.81 |
| 2'                                      | 128.16 | 131.08 | 154.51 | 128.92 | 129.06 | 128.98 | 2'                                      | 166.48 | 116.53 | 166.92 | 165.00 |
| 3'                                      | 115.96 | 114.48 | 103.16 | 117.94 | 116.42 | 117.74 | 3'                                      | 104.06 | 146.72 | 105.03 | 103.98 |
| 4'                                      | 160.74 | 160.41 | 154.88 | 159.36 | 159.01 | 159.21 | 4'                                      | 166.48 | 152.27 | 164.96 | 167.69 |
| 5'                                      | 115.96 | 114.48 | 107.83 | 117.94 | 116.42 | 117.74 | 5'                                      | 109.55 | 116.10 | 110.95 | 109.38 |
| 6'                                      | 128.16 | 131.08 | 128.29 | 128.92 | 129.06 | 128.98 | 6'                                      | 133.51 | 123.57 | 133.14 | 133.61 |
| OCH3-4'                                 | -      | 55.63  | -      | -      | -      | -      | OCH3-2                                  | -      | 61.90  | -      | -      |
| 2''                                     | -      | -      | 75.86  | -      | -      | -      | -                                       | -      | -      | -      | -      |
| 3''                                     | -      | -      | 129.24 | -      | -      | -      | -                                       | -      | -      | -      | -      |
| 4''                                     | -      | -      | 116.83 | -      | -      | -      | -                                       | -      | -      | -      | -      |
| 5''                                     | -      | -      | 27.61  | -      | -      | -      | -                                       | -      | -      | -      | -      |
| 6''                                     | -      | -      | 27.41  | -      | -      | -      | -                                       | -      | -      | -      | -      |
| <b>- <math>\beta</math> -Glu moiety</b> |        |        |        |        |        |        | <b>- <math>\beta</math> -Glu moiety</b> |        |        |        |        |
| 1'''                                    | -      | -      | -      | 102.32 | 105.45 | 100.92 | 1'''                                    | -      | -      | 100.03 | 100.51 |
| 2'''                                    | -      | -      | -      | 75.04  | 74.90  | 78.73  | 2'''                                    | -      | -      | 78.63  | 78.79  |
| 3'''                                    | -      | -      | -      | 78.11  | 77.36  | 78.75  | 3'''                                    | -      | -      | 78.25  | 78.30  |
| 4'''                                    | -      | -      | -      | 71.50  | 71.34  | 71.52  | 4'''                                    | -      | -      | 71.31  | 71.51  |
| 5'''                                    | -      | -      | -      | 78.31  | 78.74  | 78.23  | 5'''                                    | -      | -      | 78.74  | 78.71  |
| 6'''                                    | -      | -      | -      | 62.64  | 62.61  | 62.61  | 6'''                                    | -      | -      | 62.47  | 62.64  |
| <b>- <math>\beta</math> -Api moiety</b> |        |        |        |        |        |        | <b>- <math>\beta</math> -Api moiety</b> |        |        |        |        |
| 1''''                                   | -      | -      | -      | -      | -      | 110.92 | 1''''                                   | -      | -      | 109.45 | 110.93 |
| 2''''                                   | -      | -      | -      | -      | -      | 78.16  | 2''''                                   | -      | -      | 78.65  | 78.79  |
| 3''''                                   | -      | -      | -      | -      | -      | 80.82  | 3''''                                   | -      | -      | 80.89  | 80.88  |
| 4''''                                   | -      | -      | -      | -      | -      | 75.60  | 4''''                                   | -      | -      | 75.59  | 75.69  |
| 5''''                                   | -      | -      | -      | -      | -      | 66.18  | 5''''                                   | -      | -      | 66.11  | 66.19  |

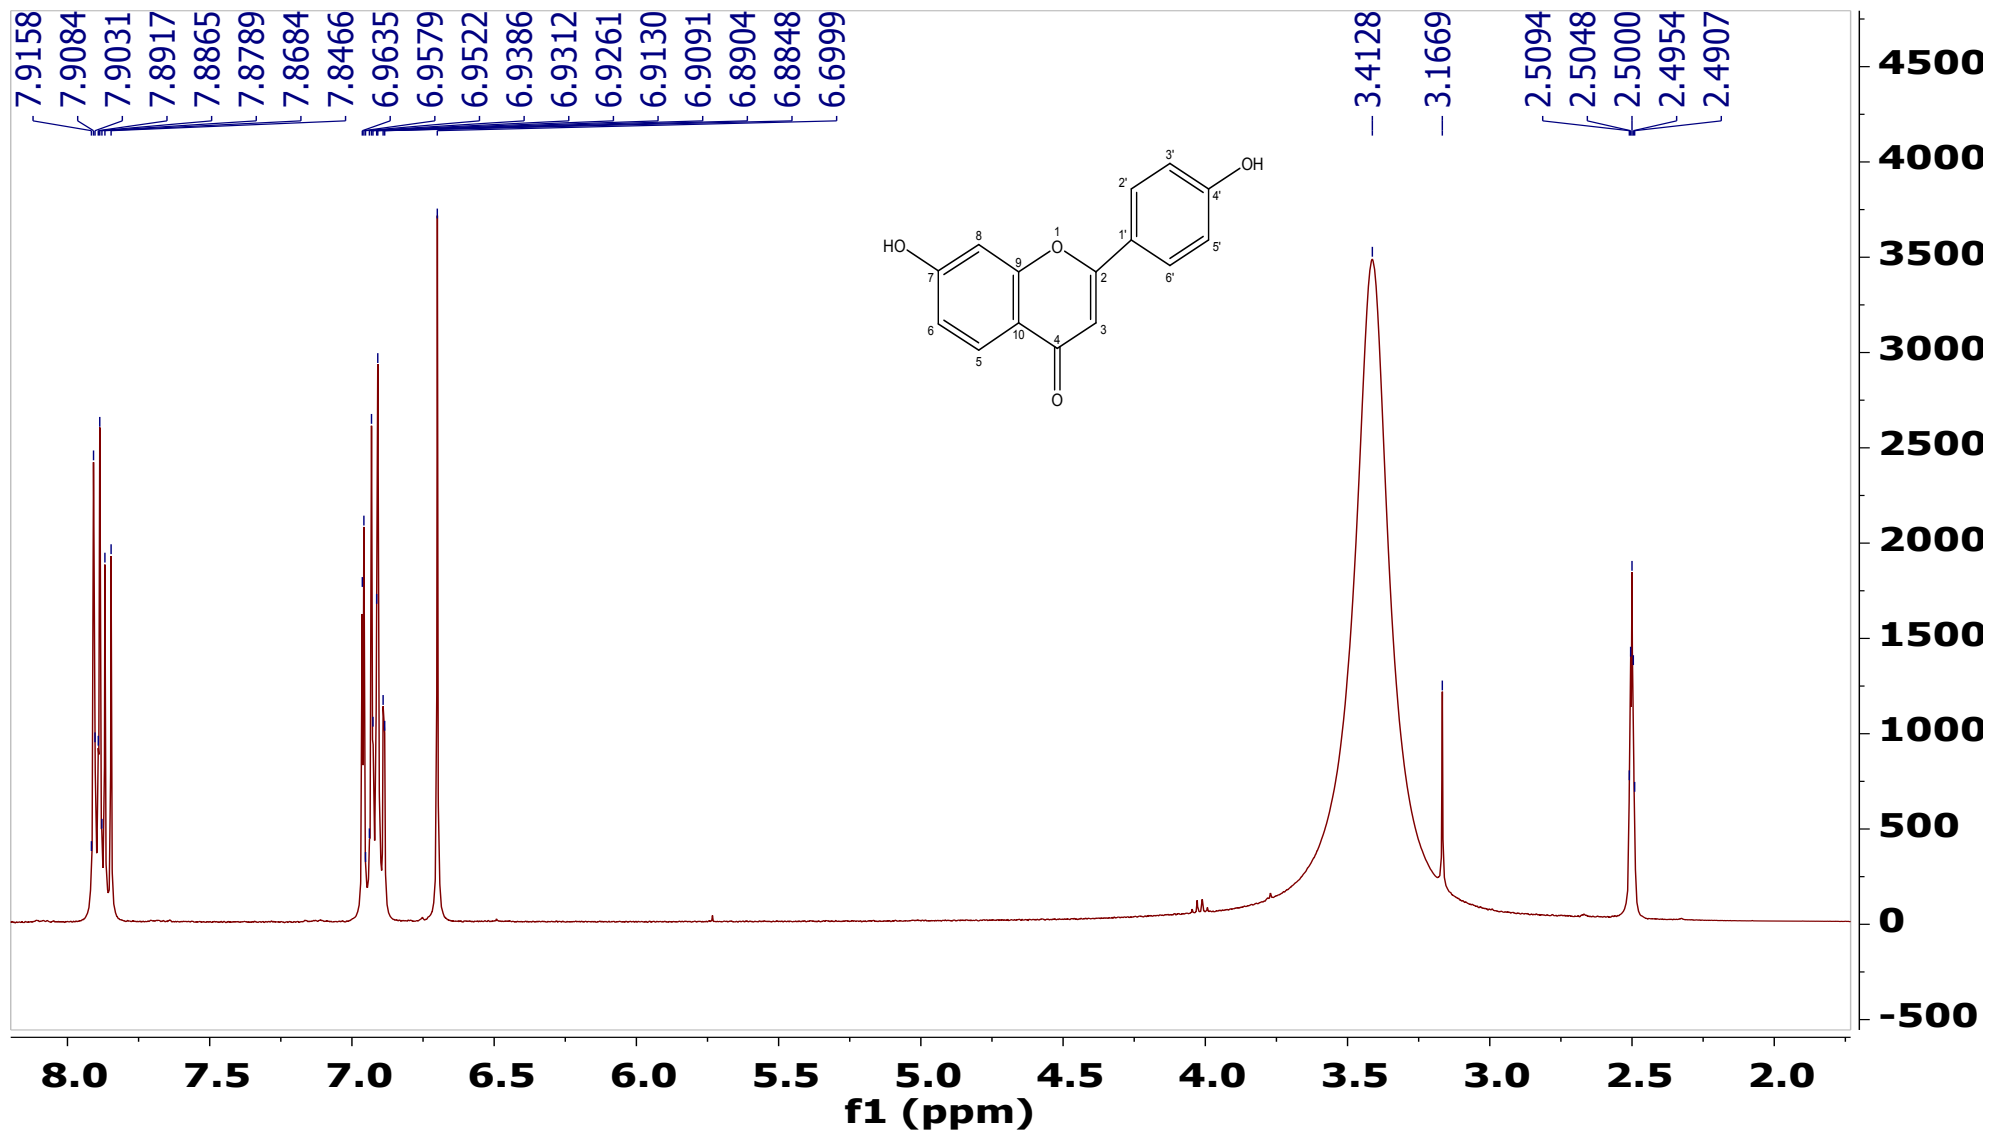

Fig. S2 <sup>1</sup>H-NMR spectrum of 7, 4'-dihydroxyflavone (1) in DMSO, d<sub>6</sub> at 400 MHz

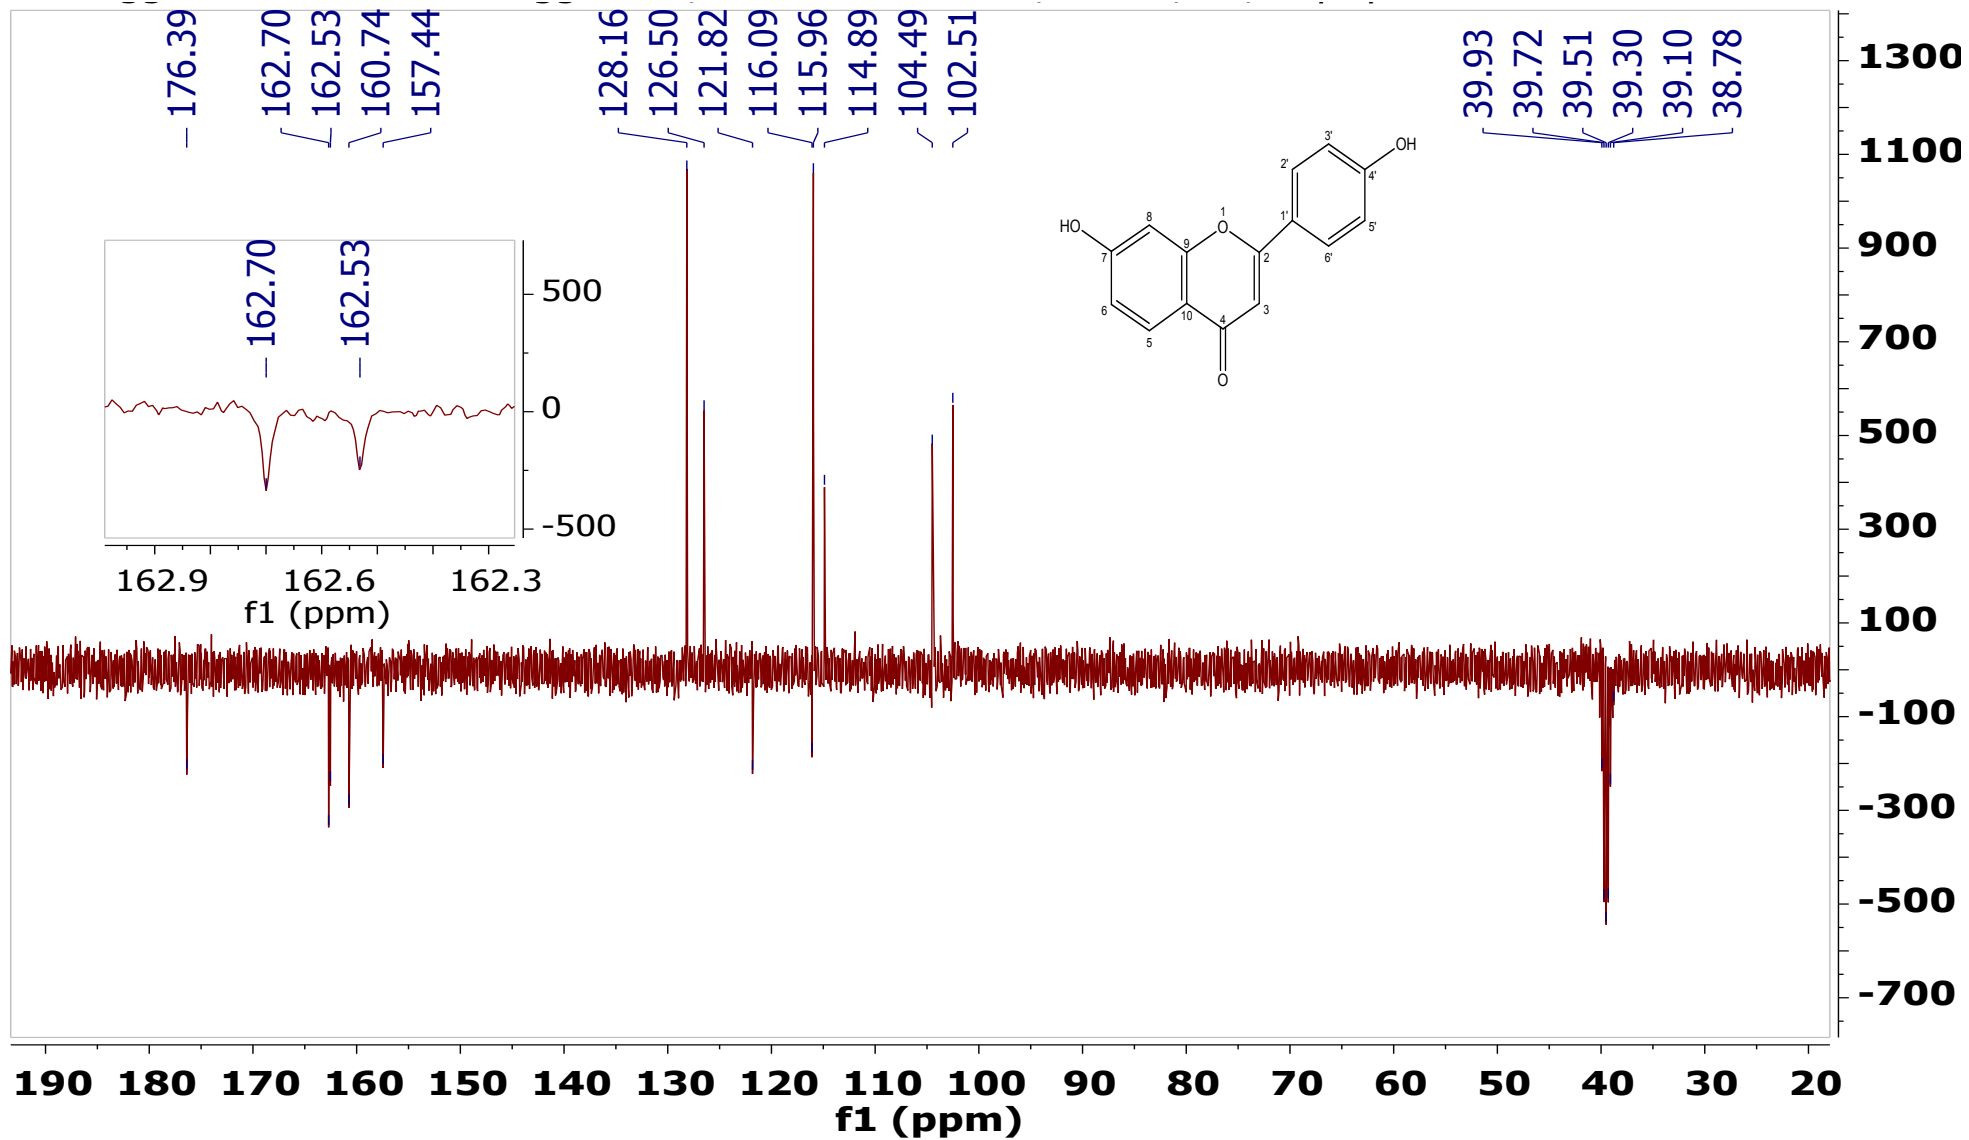

Fig. S3  $^{13}\text{C}$ -DEPTQ spectrum of 7, 4'-dihydroxyflavone (1) in DMSO, d6 at 100 MHz (with expansion at 162.3-162.9 ppm)



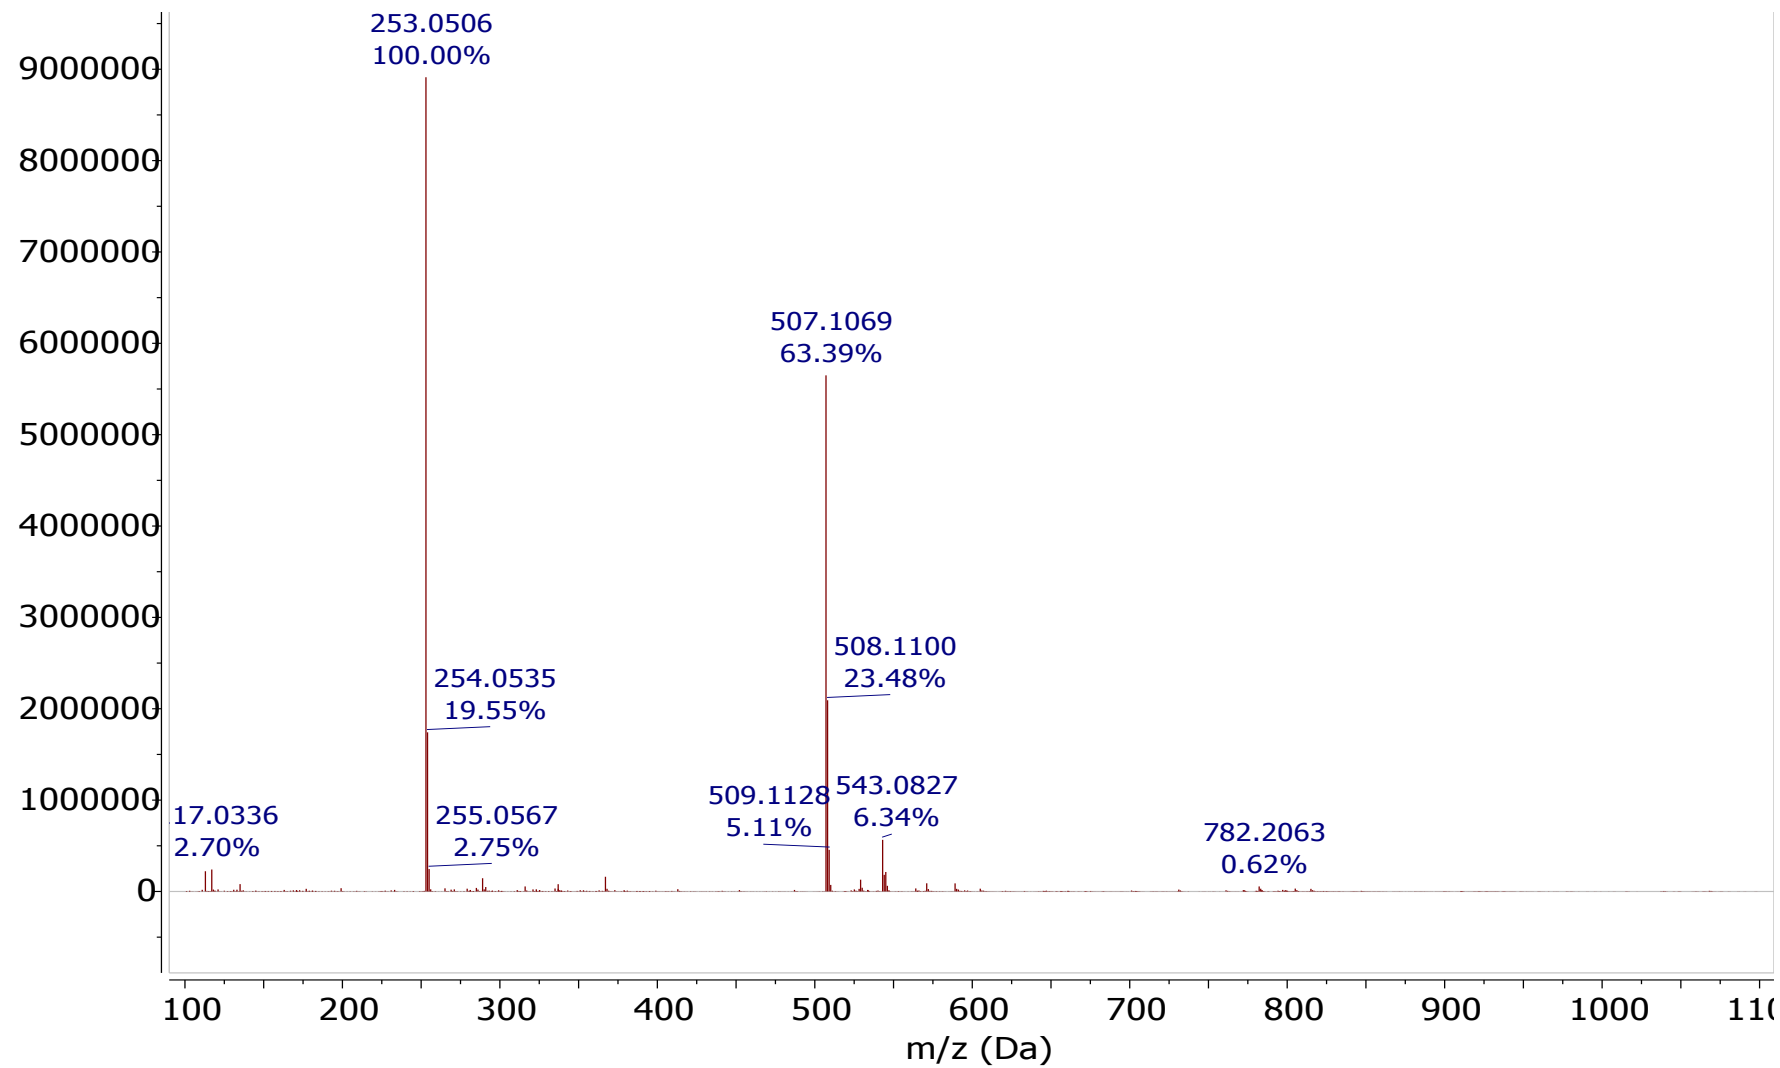

Fig. S4 HRESIMS spectrum of 7, 4'-dihydroxyflavone (1) in negative mode

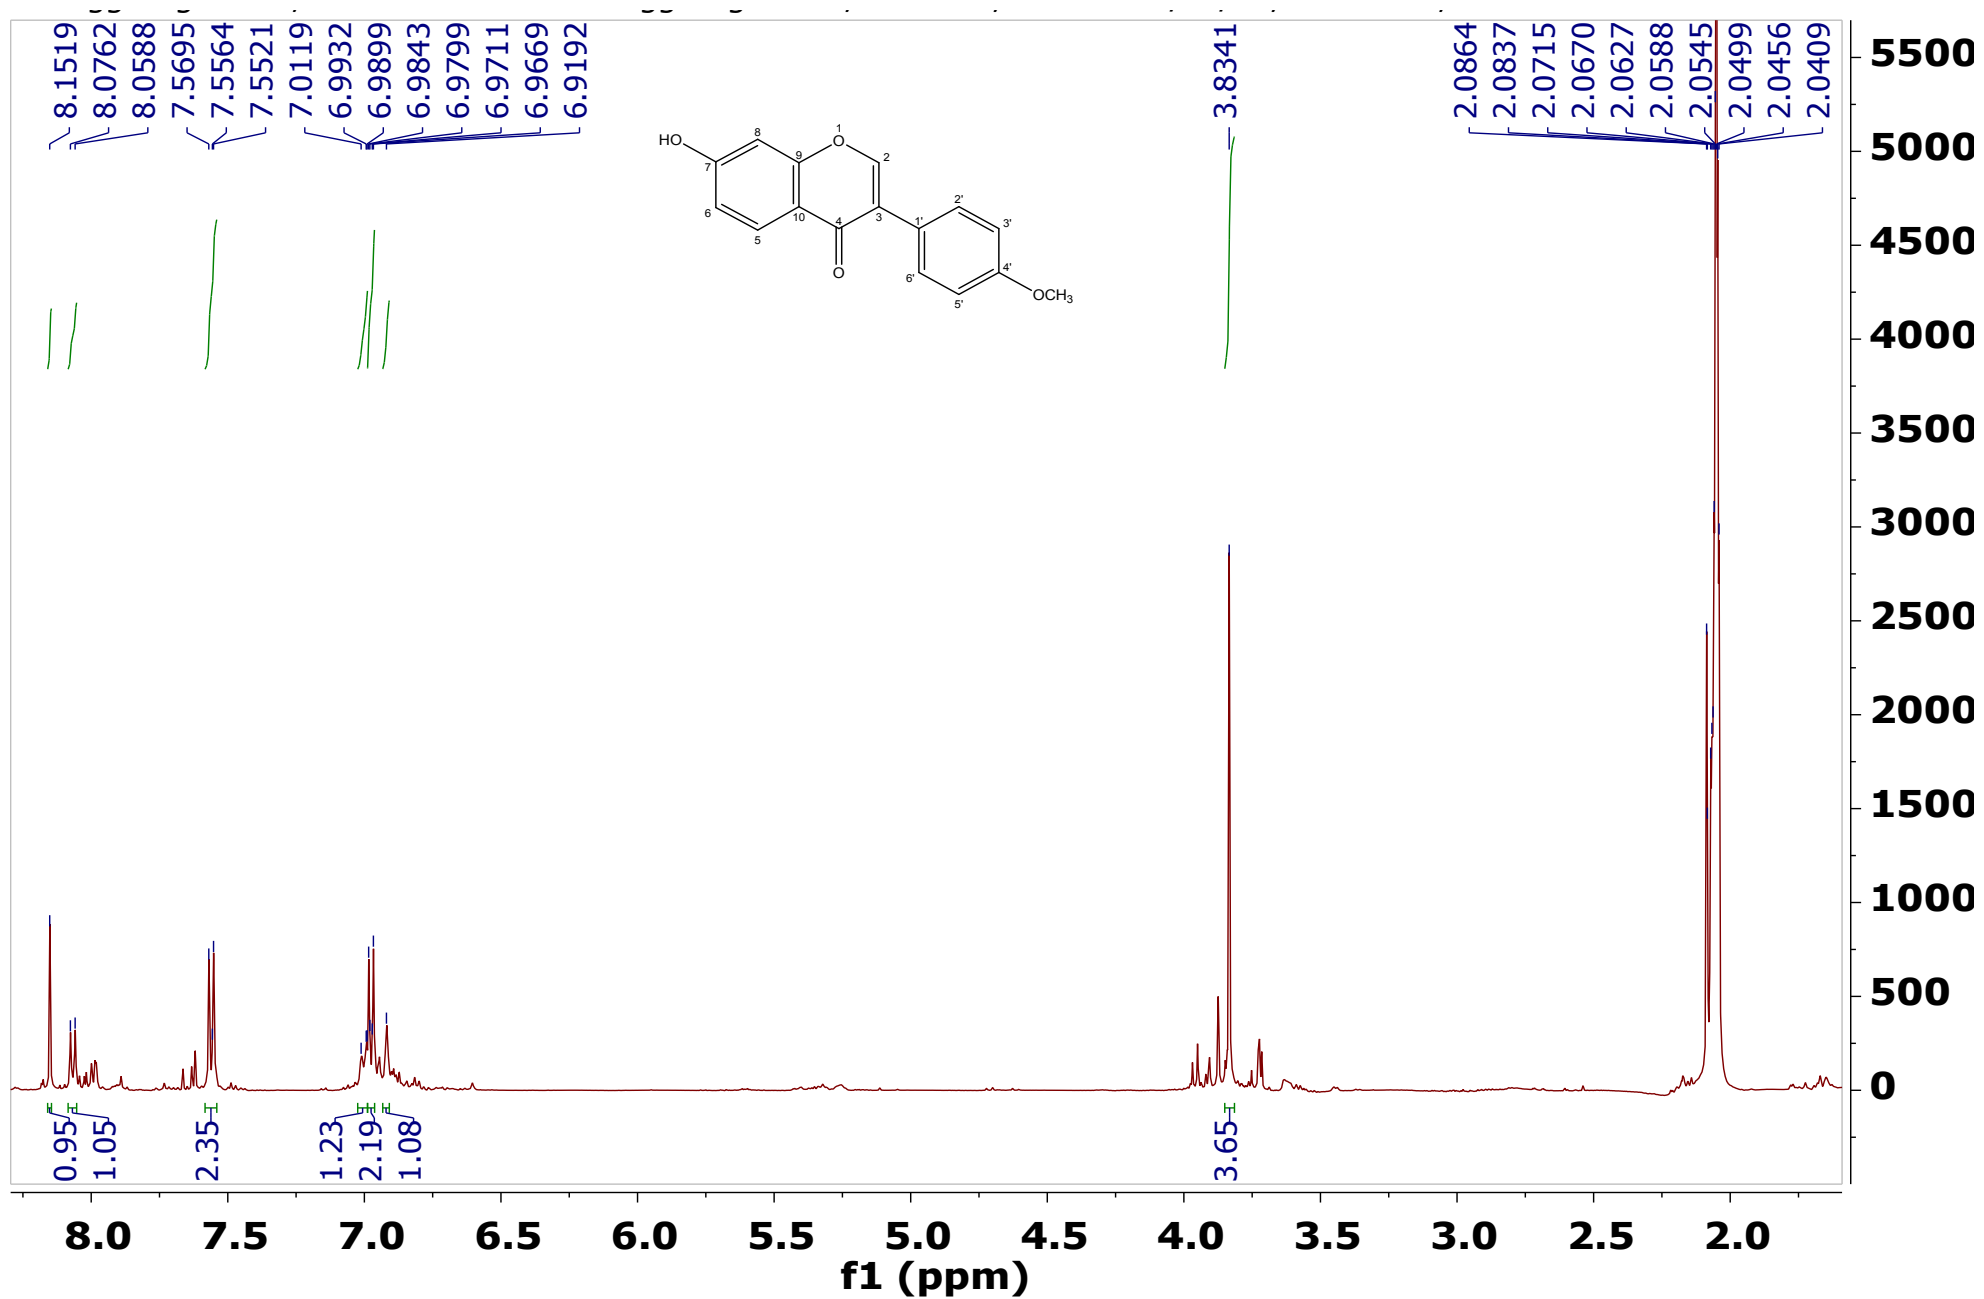

Fig. S5 <sup>1</sup>H-NMR spectrum of 7-hydroxy-4'-methoxyisoflavone (2) in Acetone, d<sub>6</sub> at 500 MHz

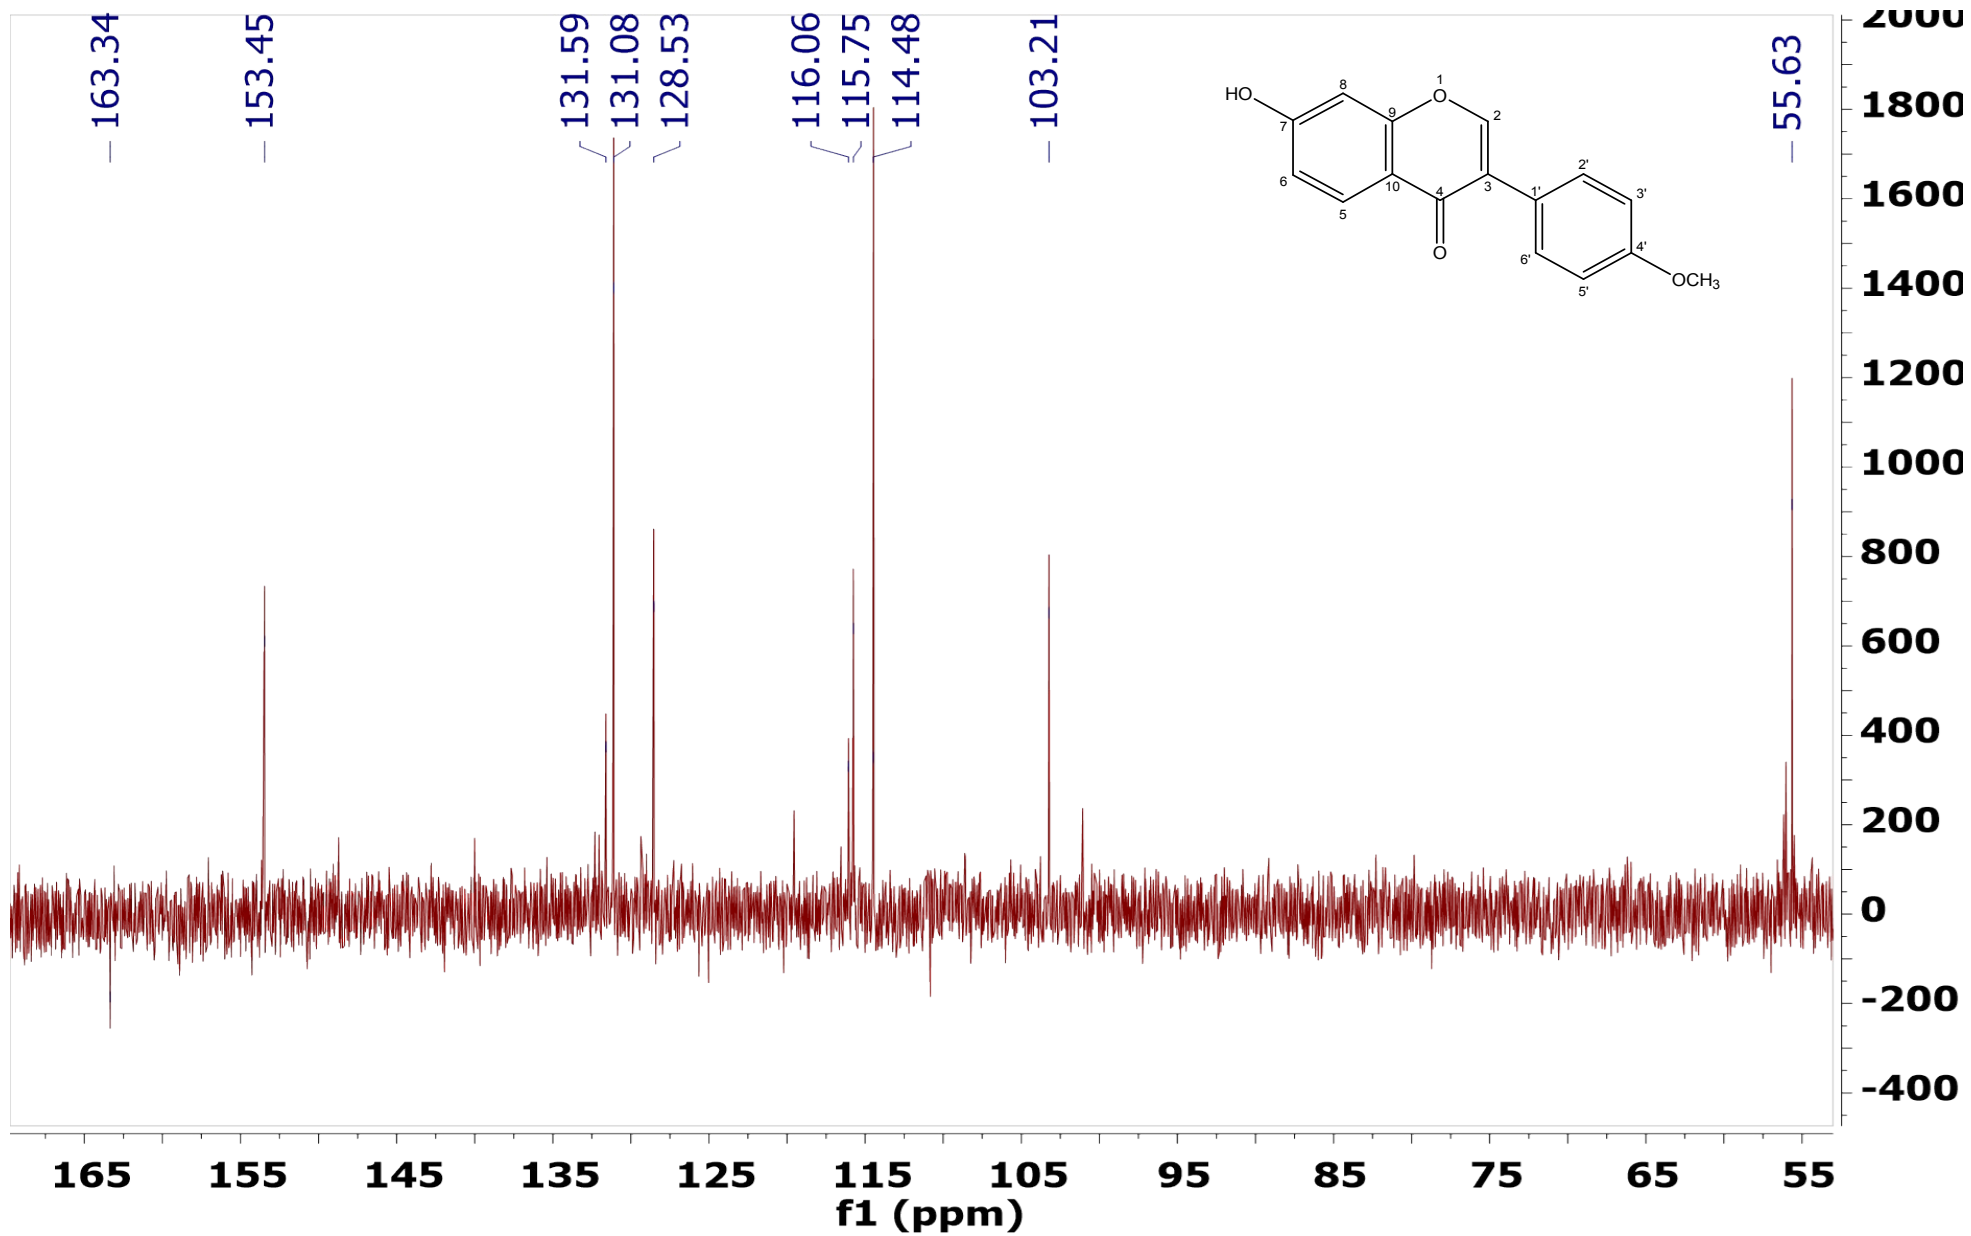

Fig. S6  $^{13}\text{C}$ -DEPTQ spectrum of 7-hydroxy-4'-methoxyisoflavone (2) in Acetone,  $\text{d}_6$  at 100 MHz

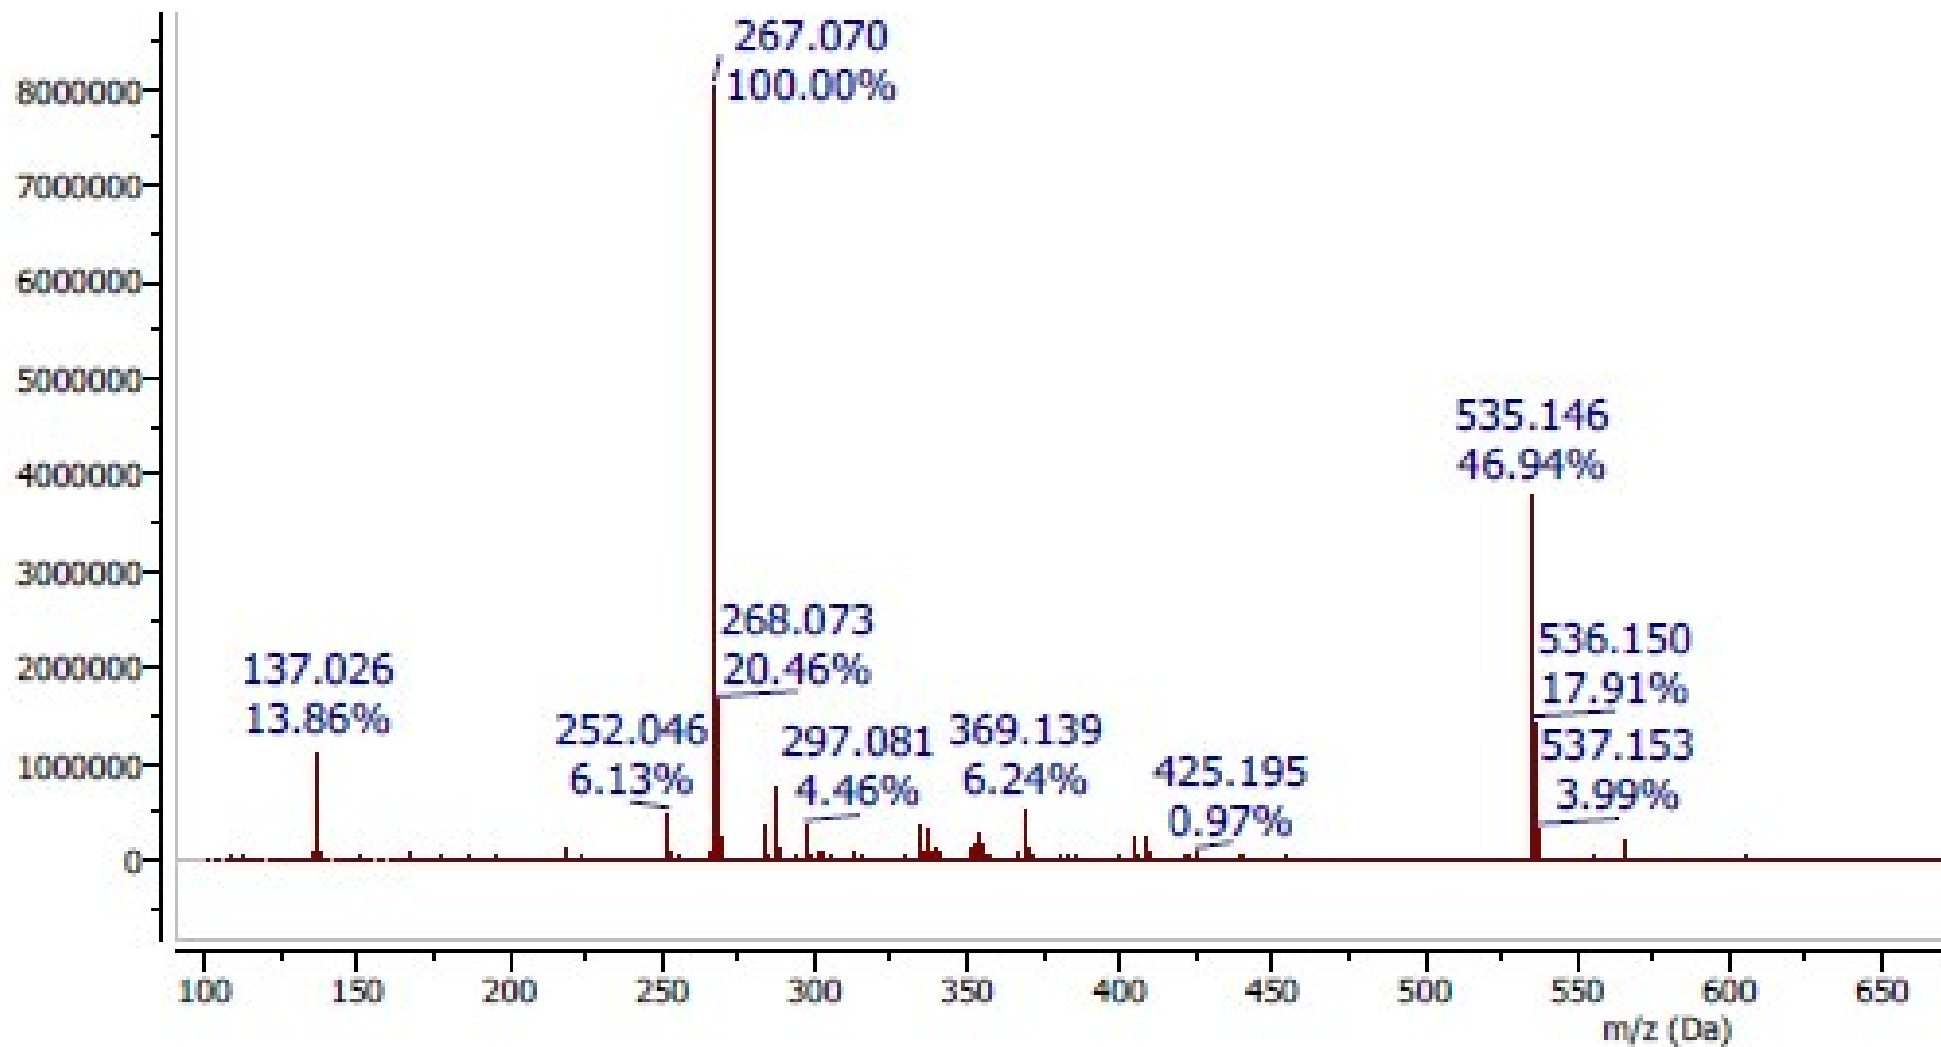

Fig. S7 HRESIMS spectrum of 7-hydroxy-4'-methoxyisoflavone (2) in negative mode

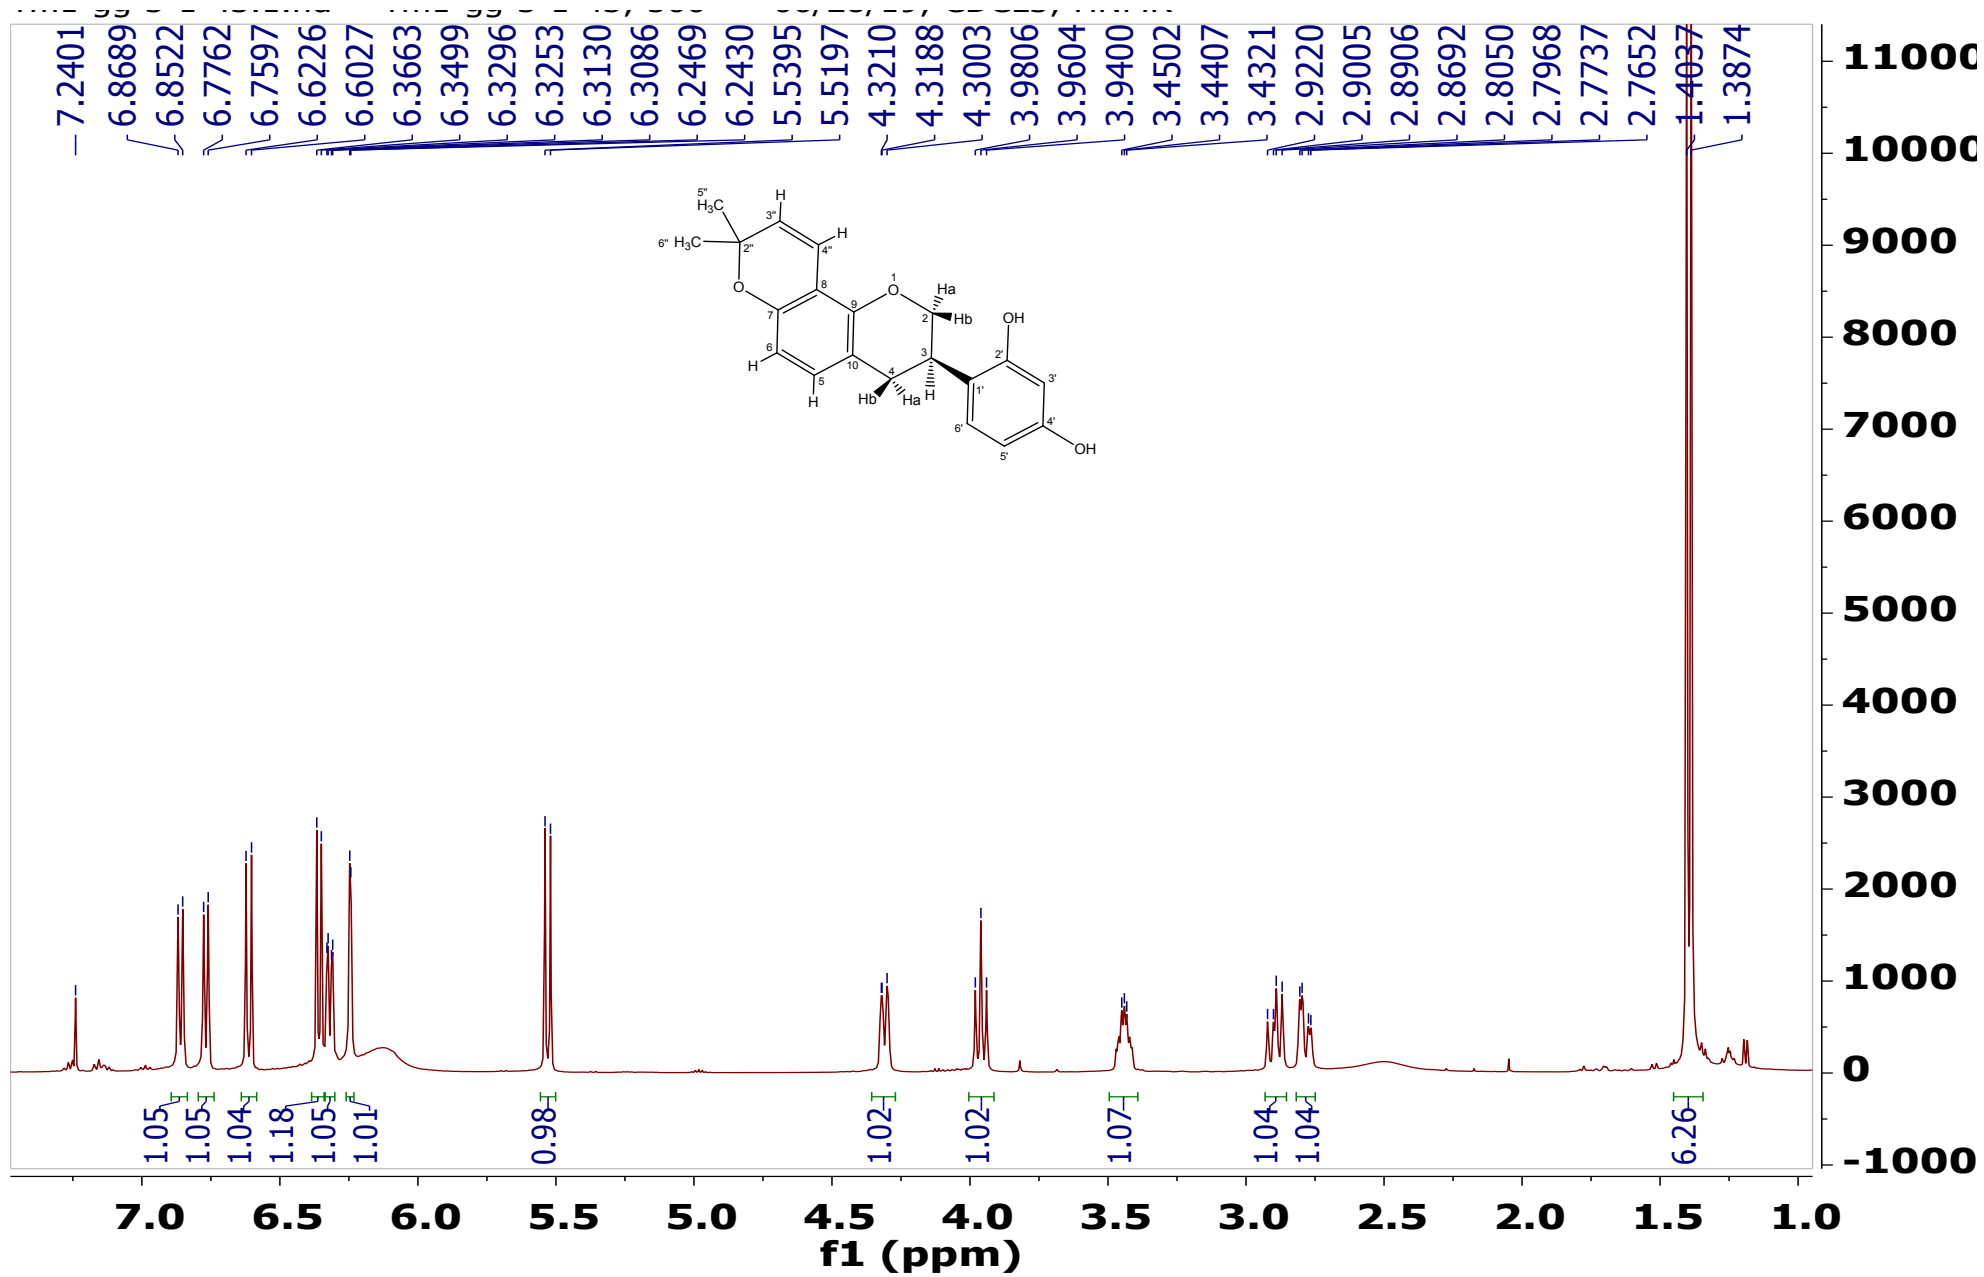

Fig. S8  $^1\text{H-NMR}$  spectrum of 3-R-glabridin (3) in  $\text{CDCl}_3$  at 500 MHz

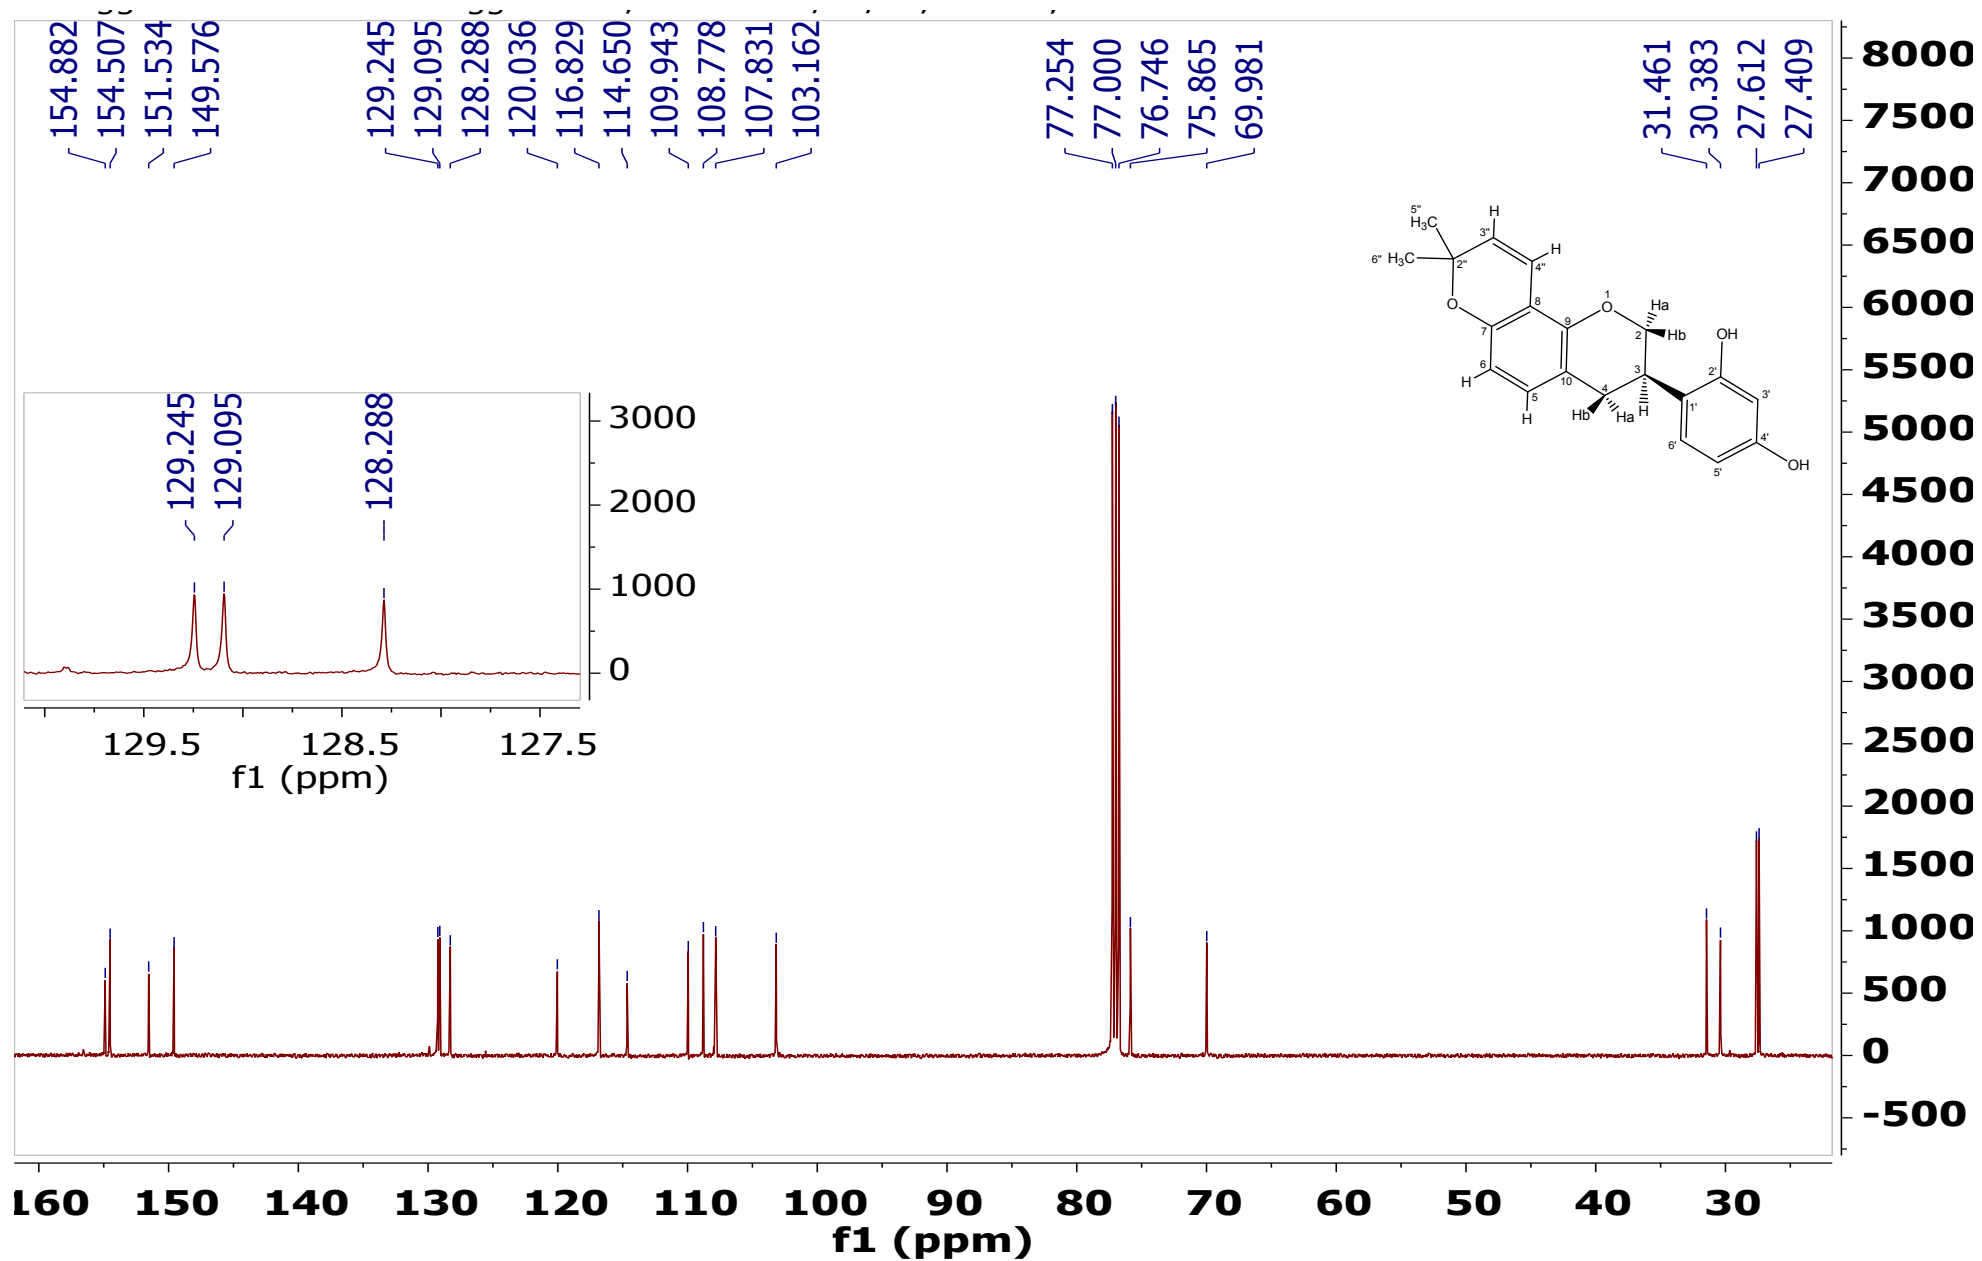

Fig. S9 <sup>13</sup>C-NMR spectrum of 3-R-glabridin (3) in CDCl<sub>3</sub> at 125 MHz with expansion at (127.5- 129.5 ppm)

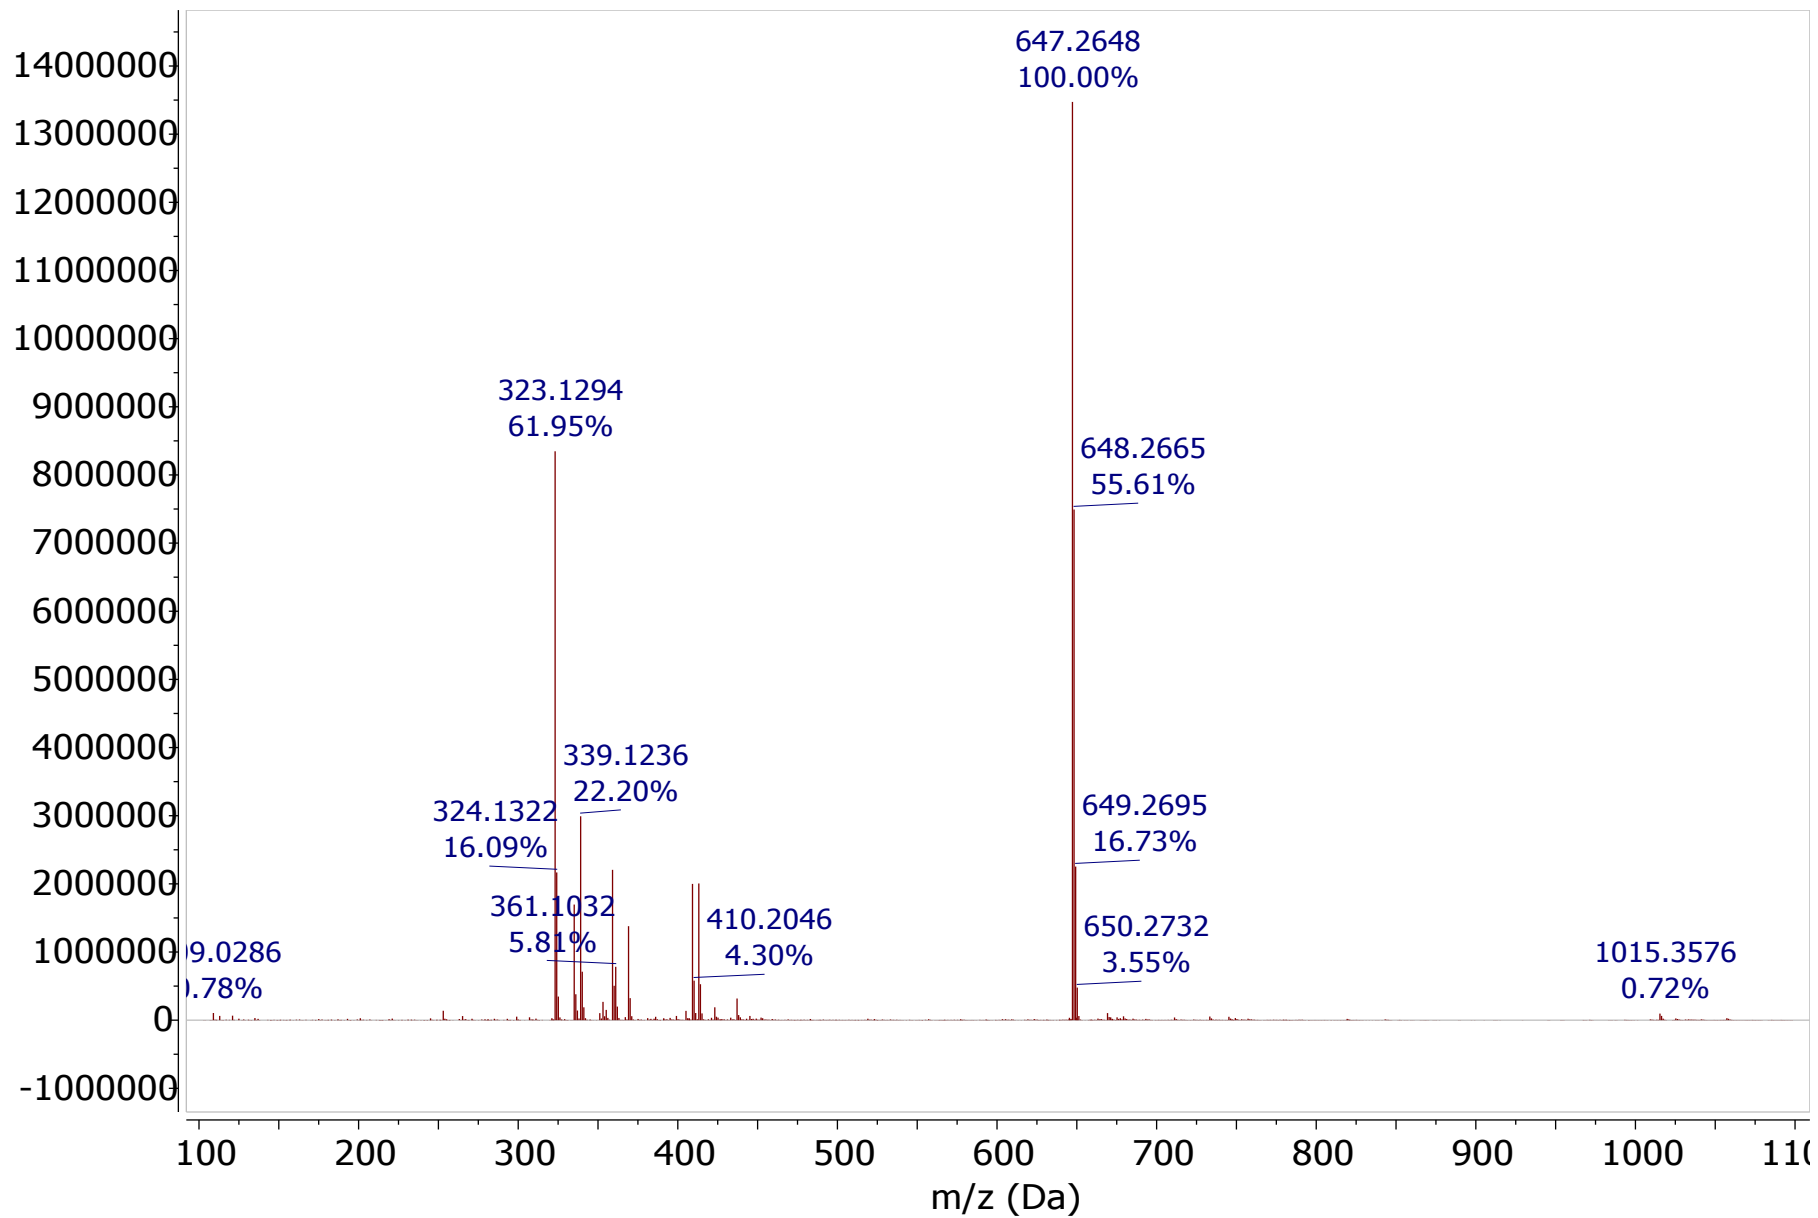

**Fig. S10** HRESIMS spectrum of 3-R-glabridin (3) in negative mode

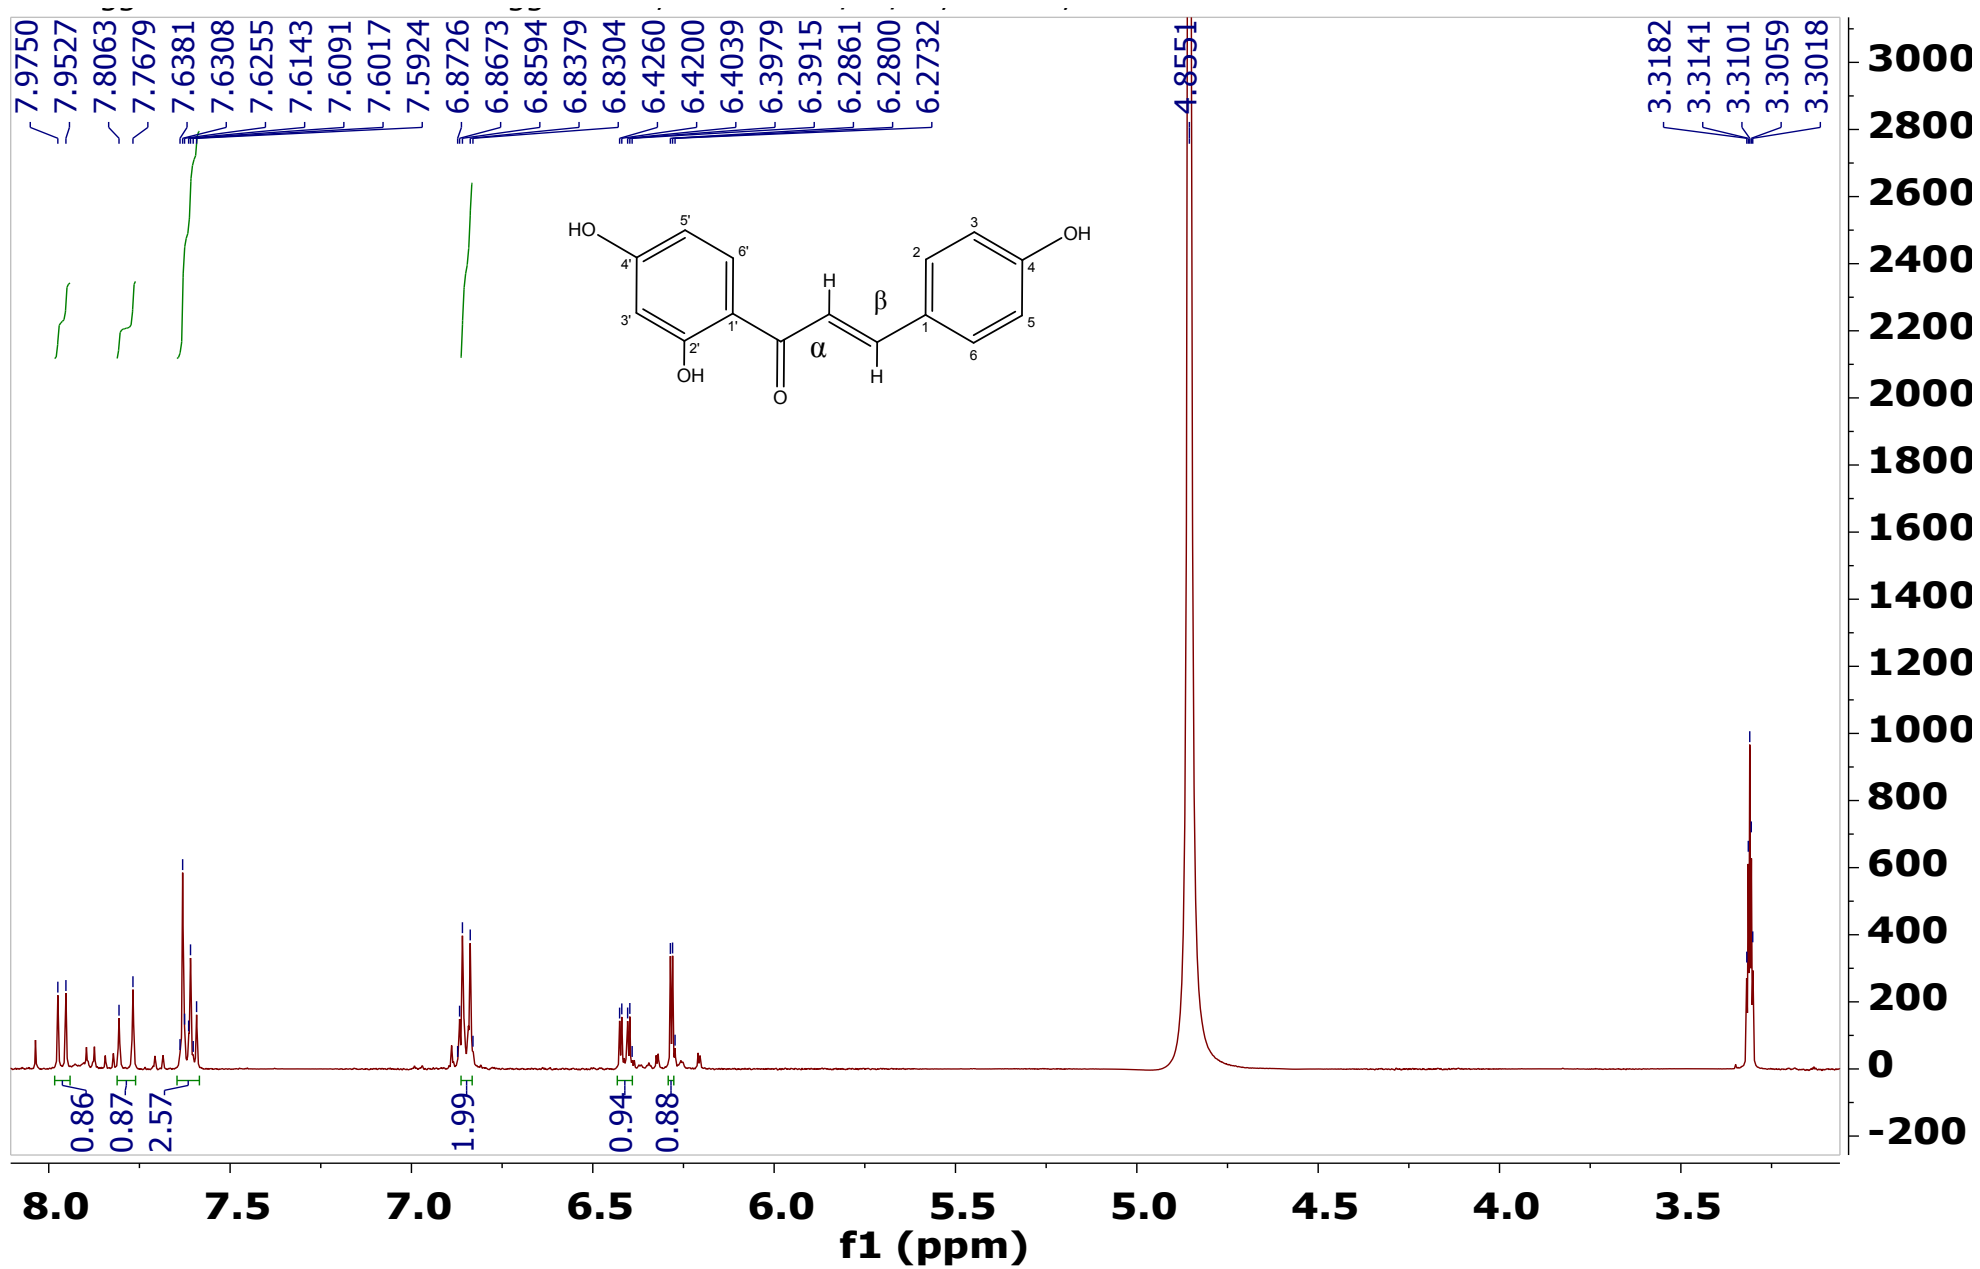

Fig. S11  $^1\text{H-NMR}$  spectrum of isoliquirtigenin (4) in  $\text{CD}_3\text{OD}$  at 400 MHz



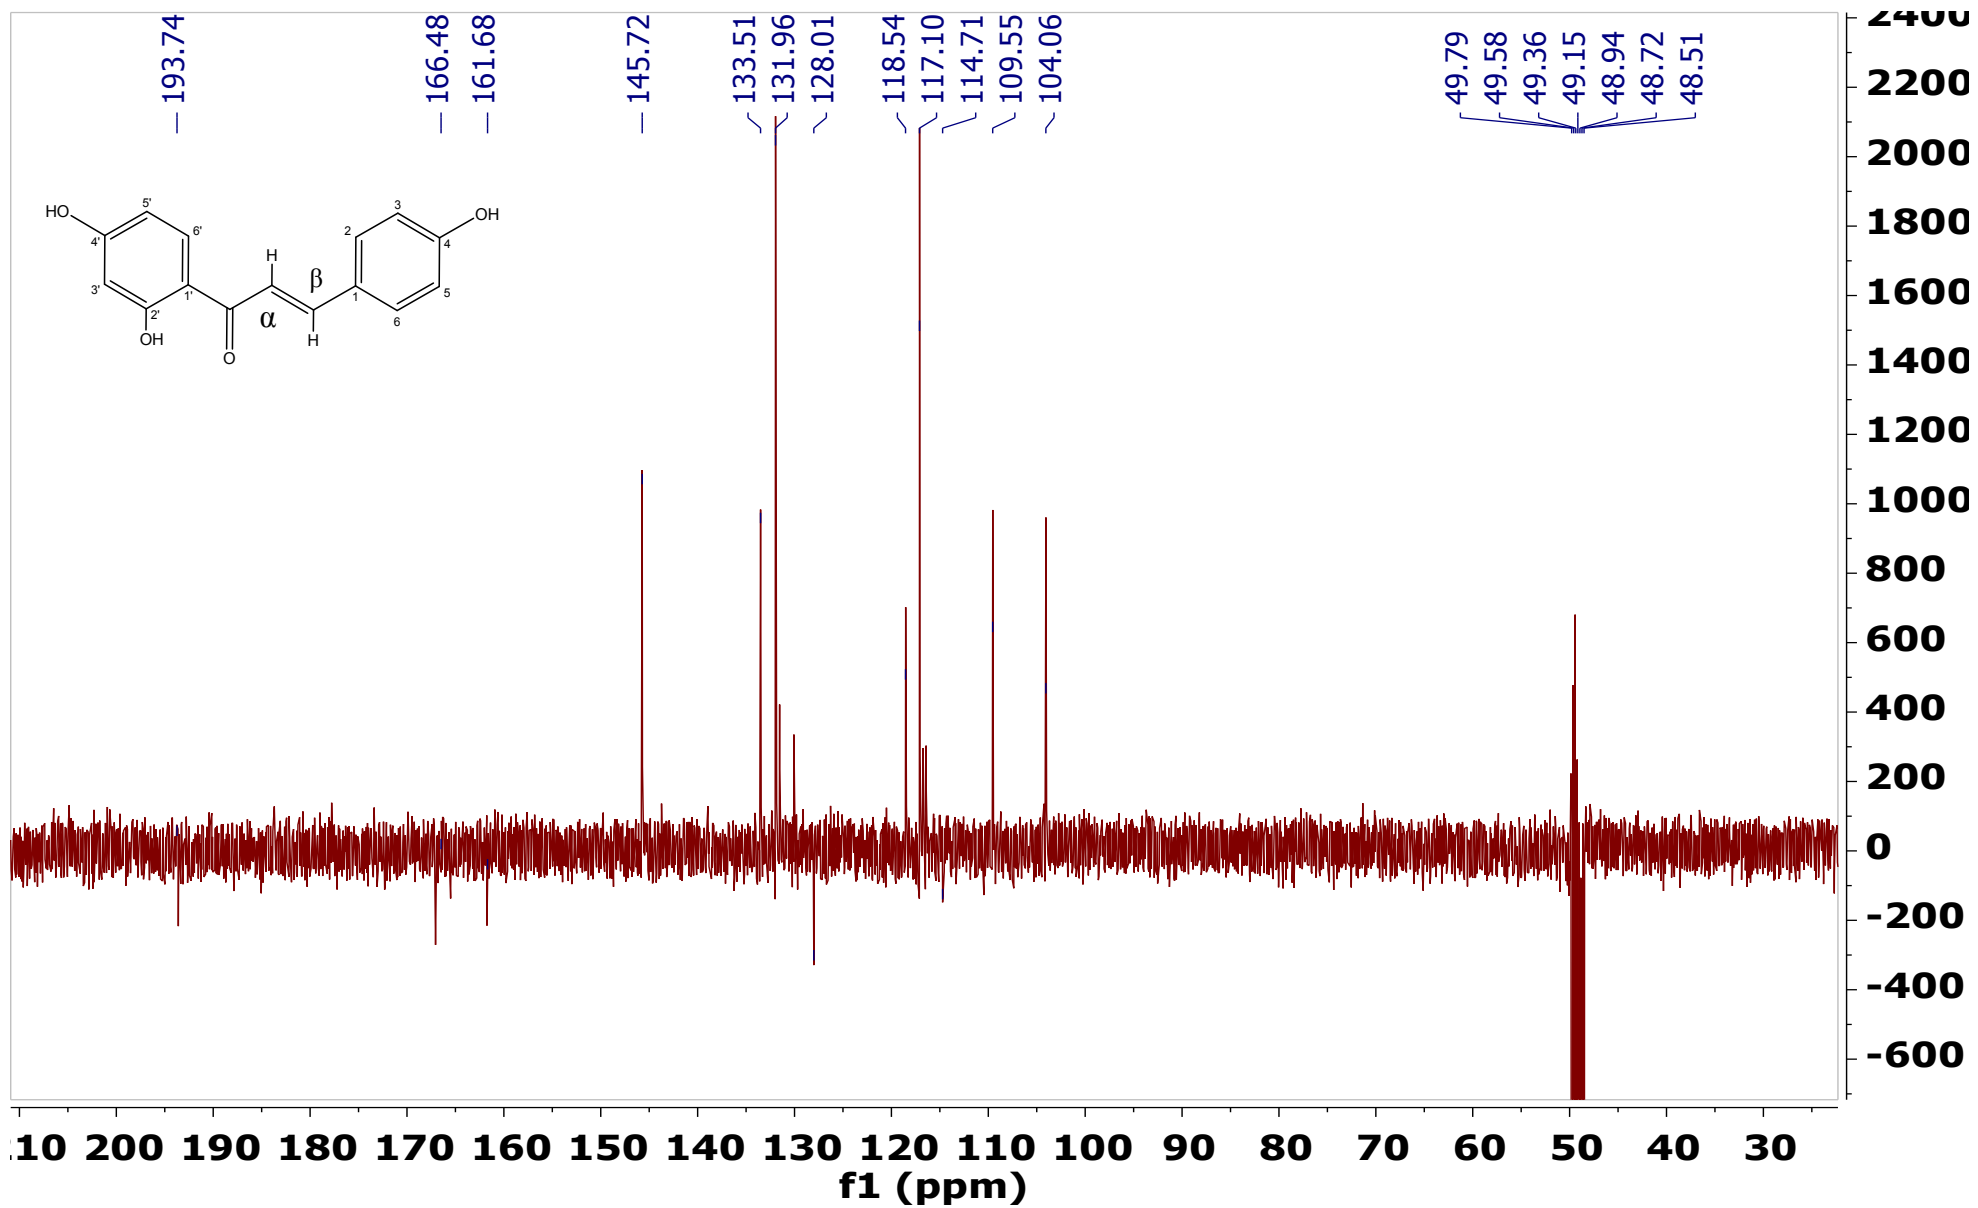

Fig. S12  $^{13}\text{C}$ -DEPTQ spectrum of isoliquirtigenin (4) in  $\text{CD}_3\text{OD}$  at 100 MHz

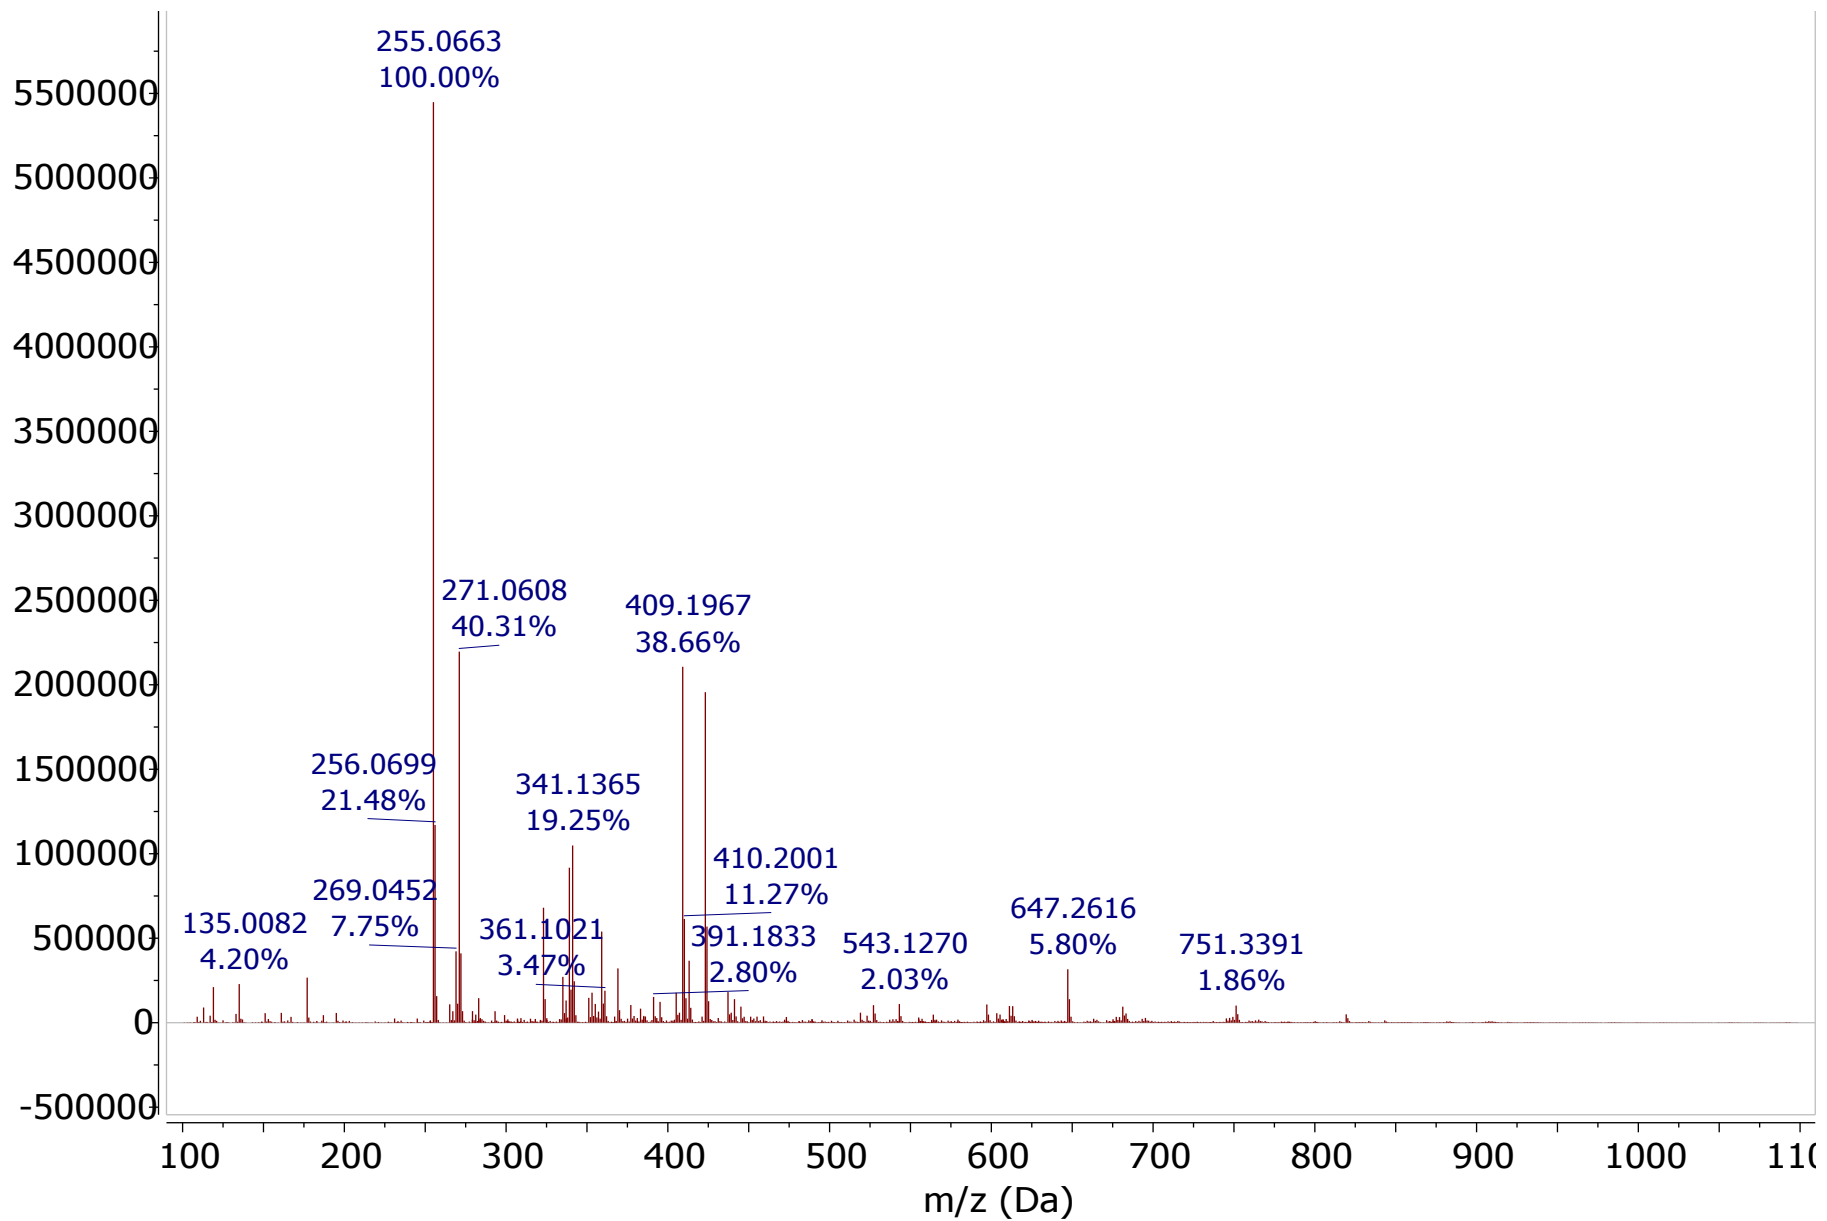

Fig. S13 HRESIMS spectrum of isoliquirtigenin (4) in negative mode

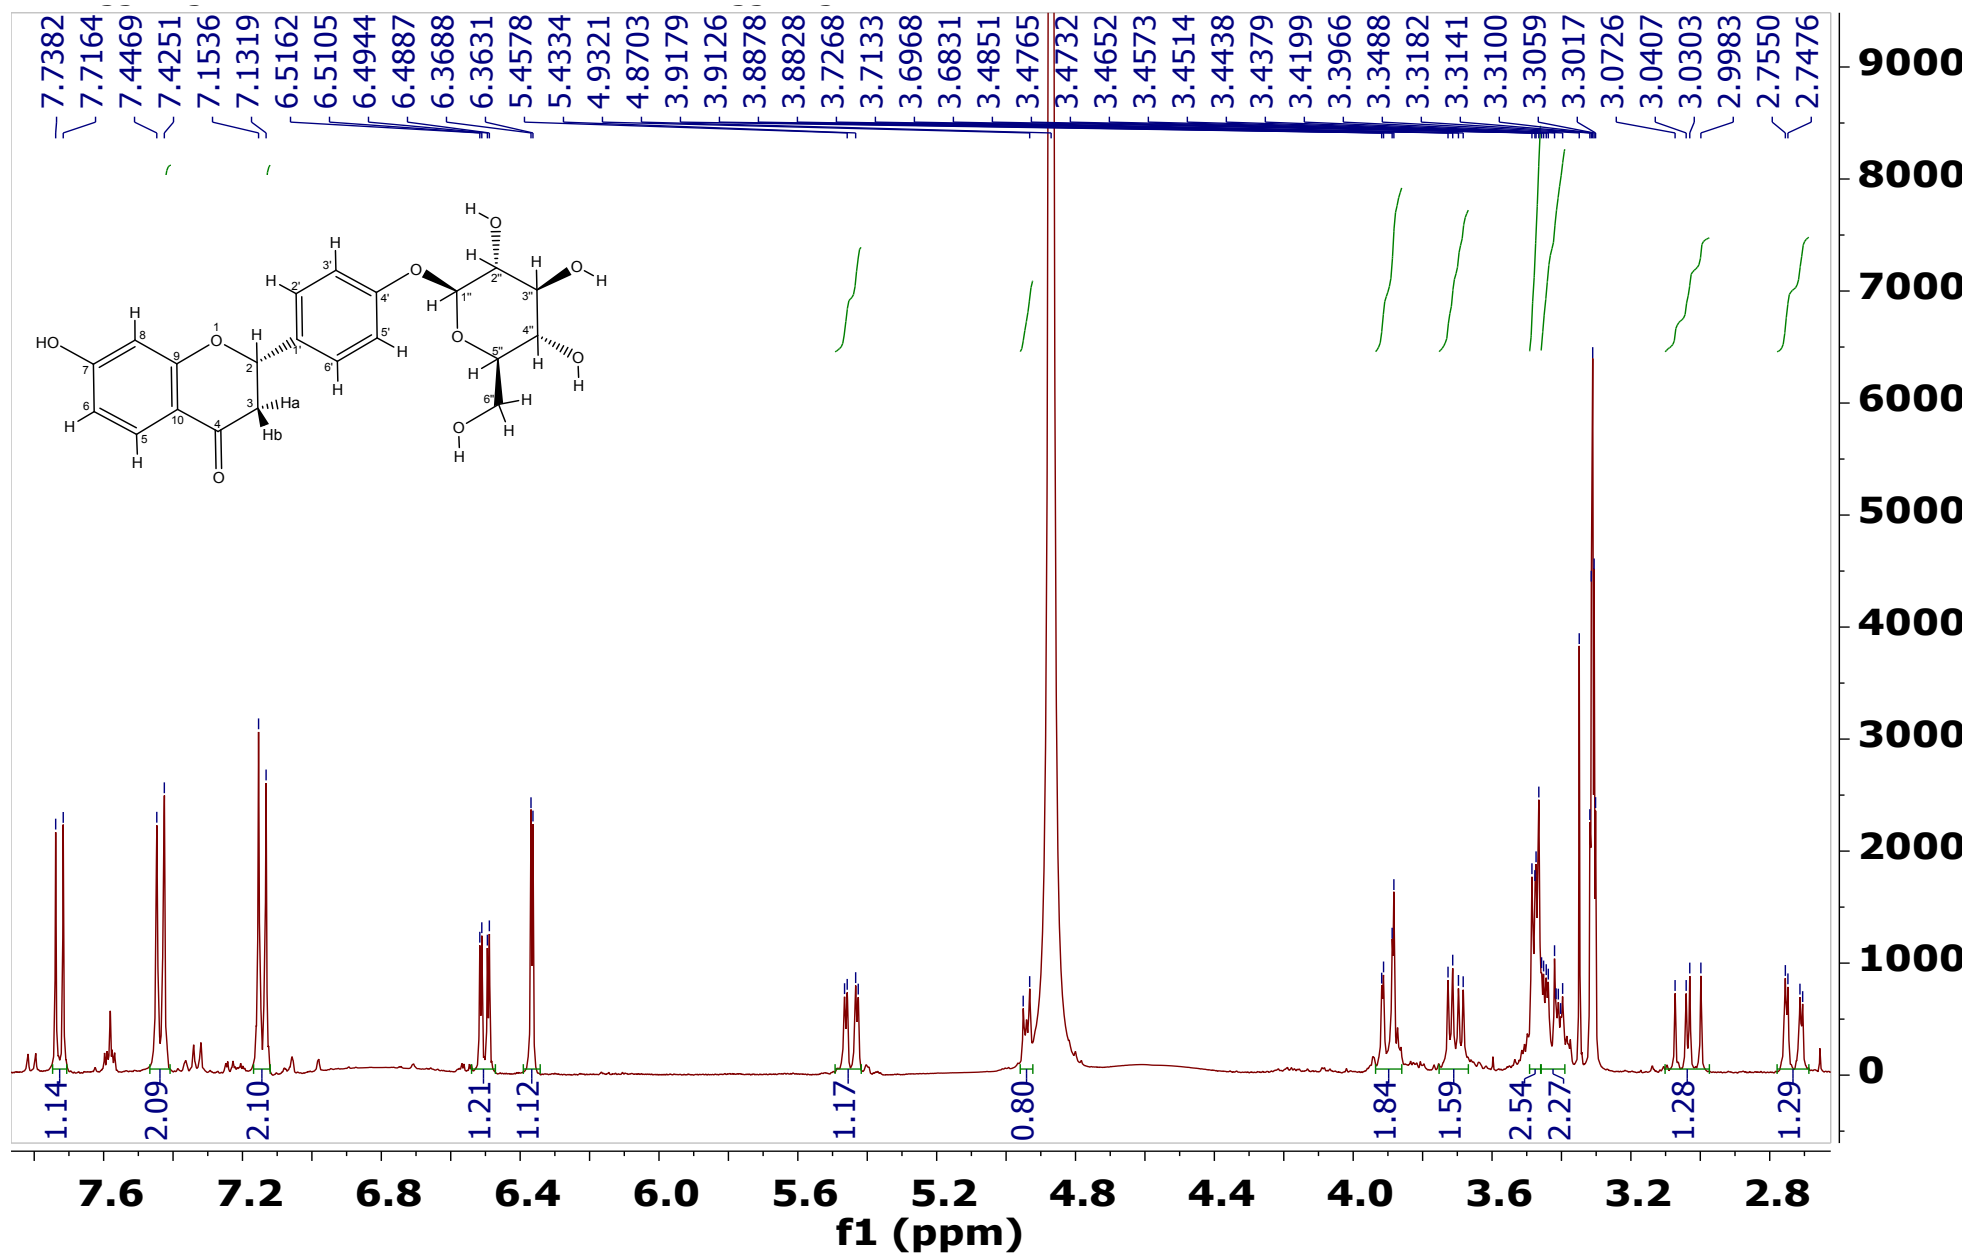

Fig. S14 <sup>1</sup>H-NMR spectrum of liquirtin (5) in CD<sub>3</sub>OD at 400 MHz

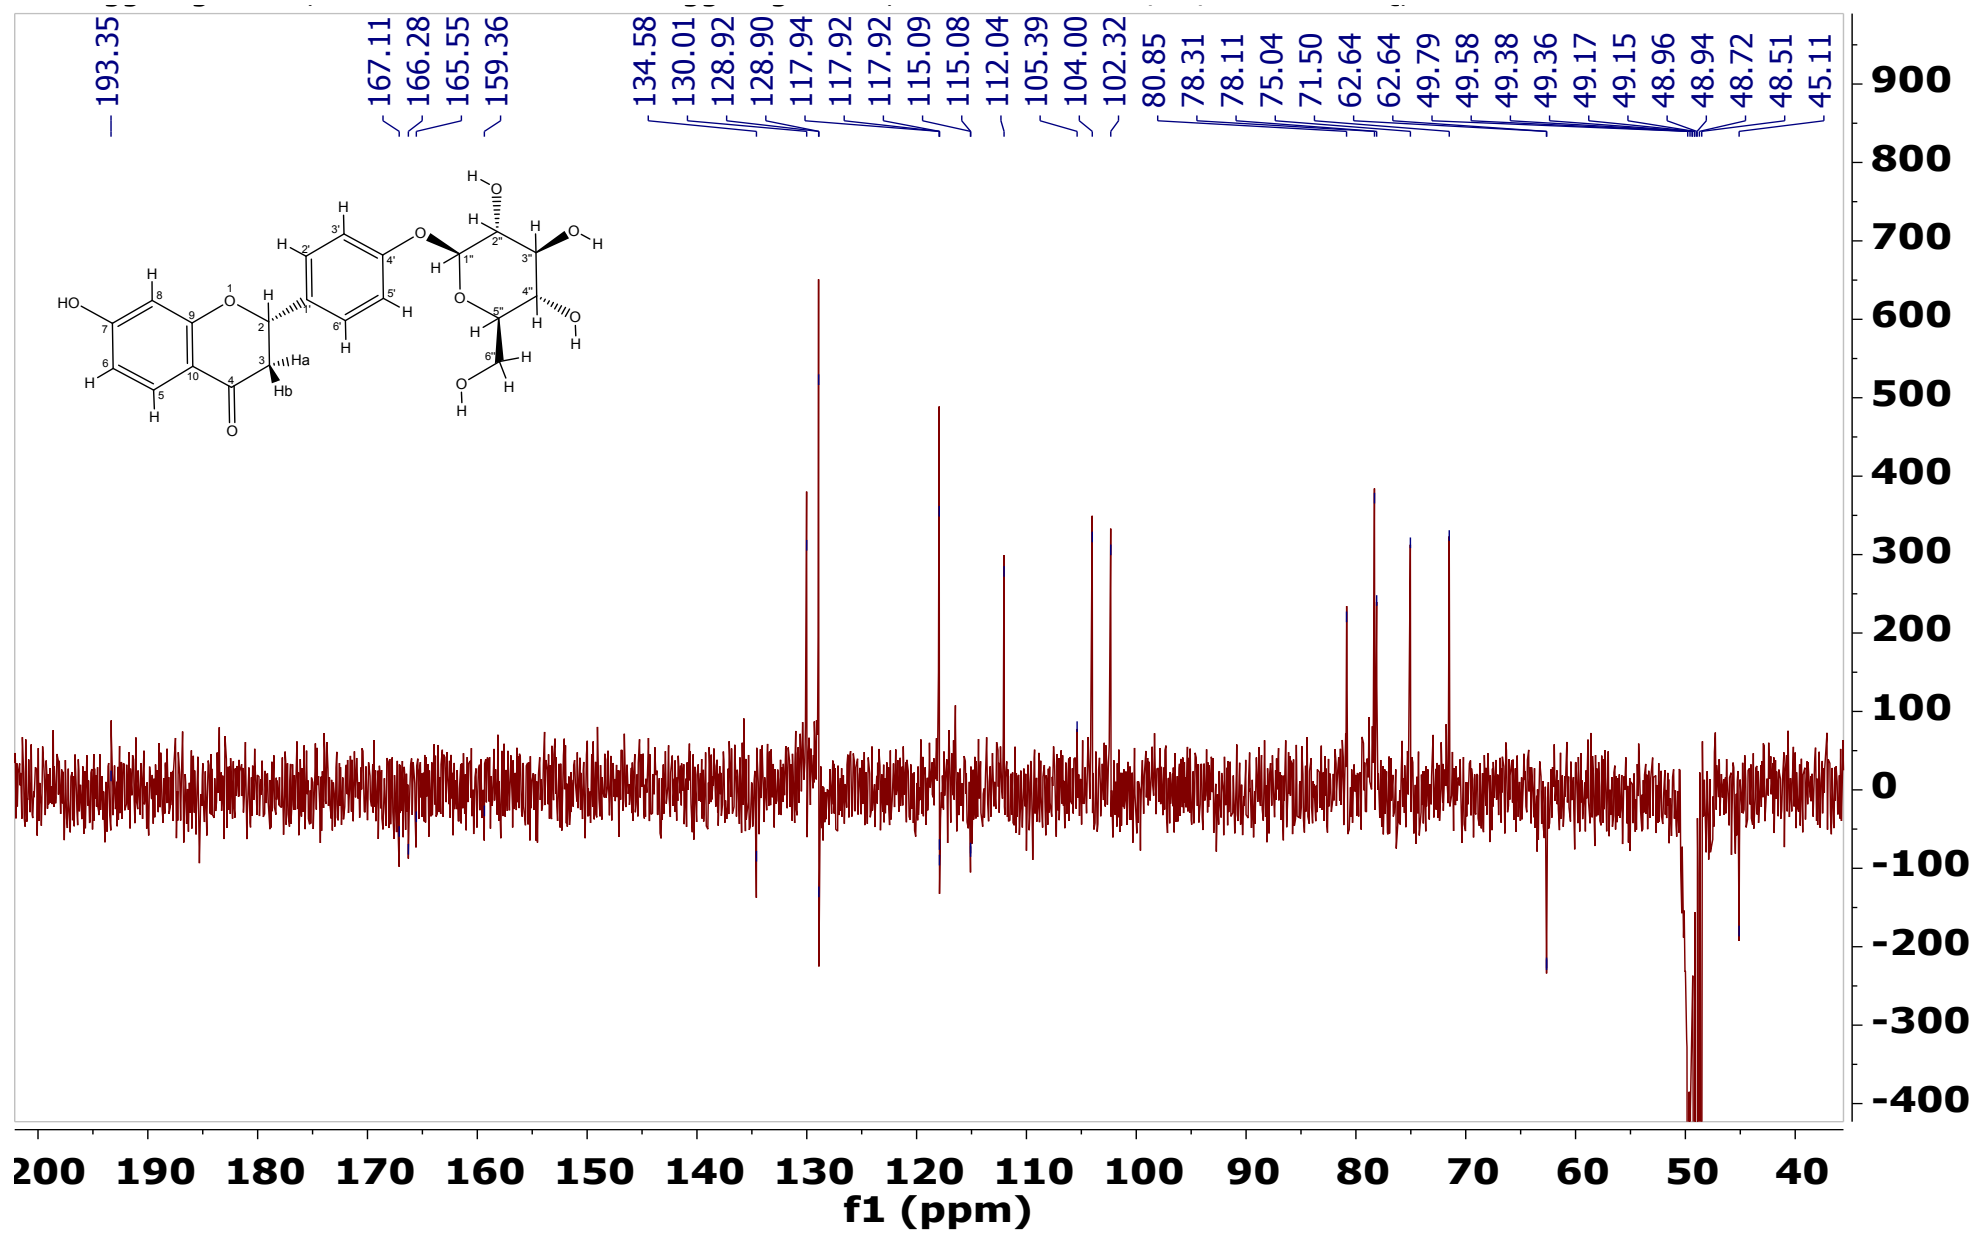

Fig. S15  $^{13}\text{C}$ -DEPTQ spectrum of liquiritin (5) in  $\text{CD}_3\text{OD}$  at 100 MHz

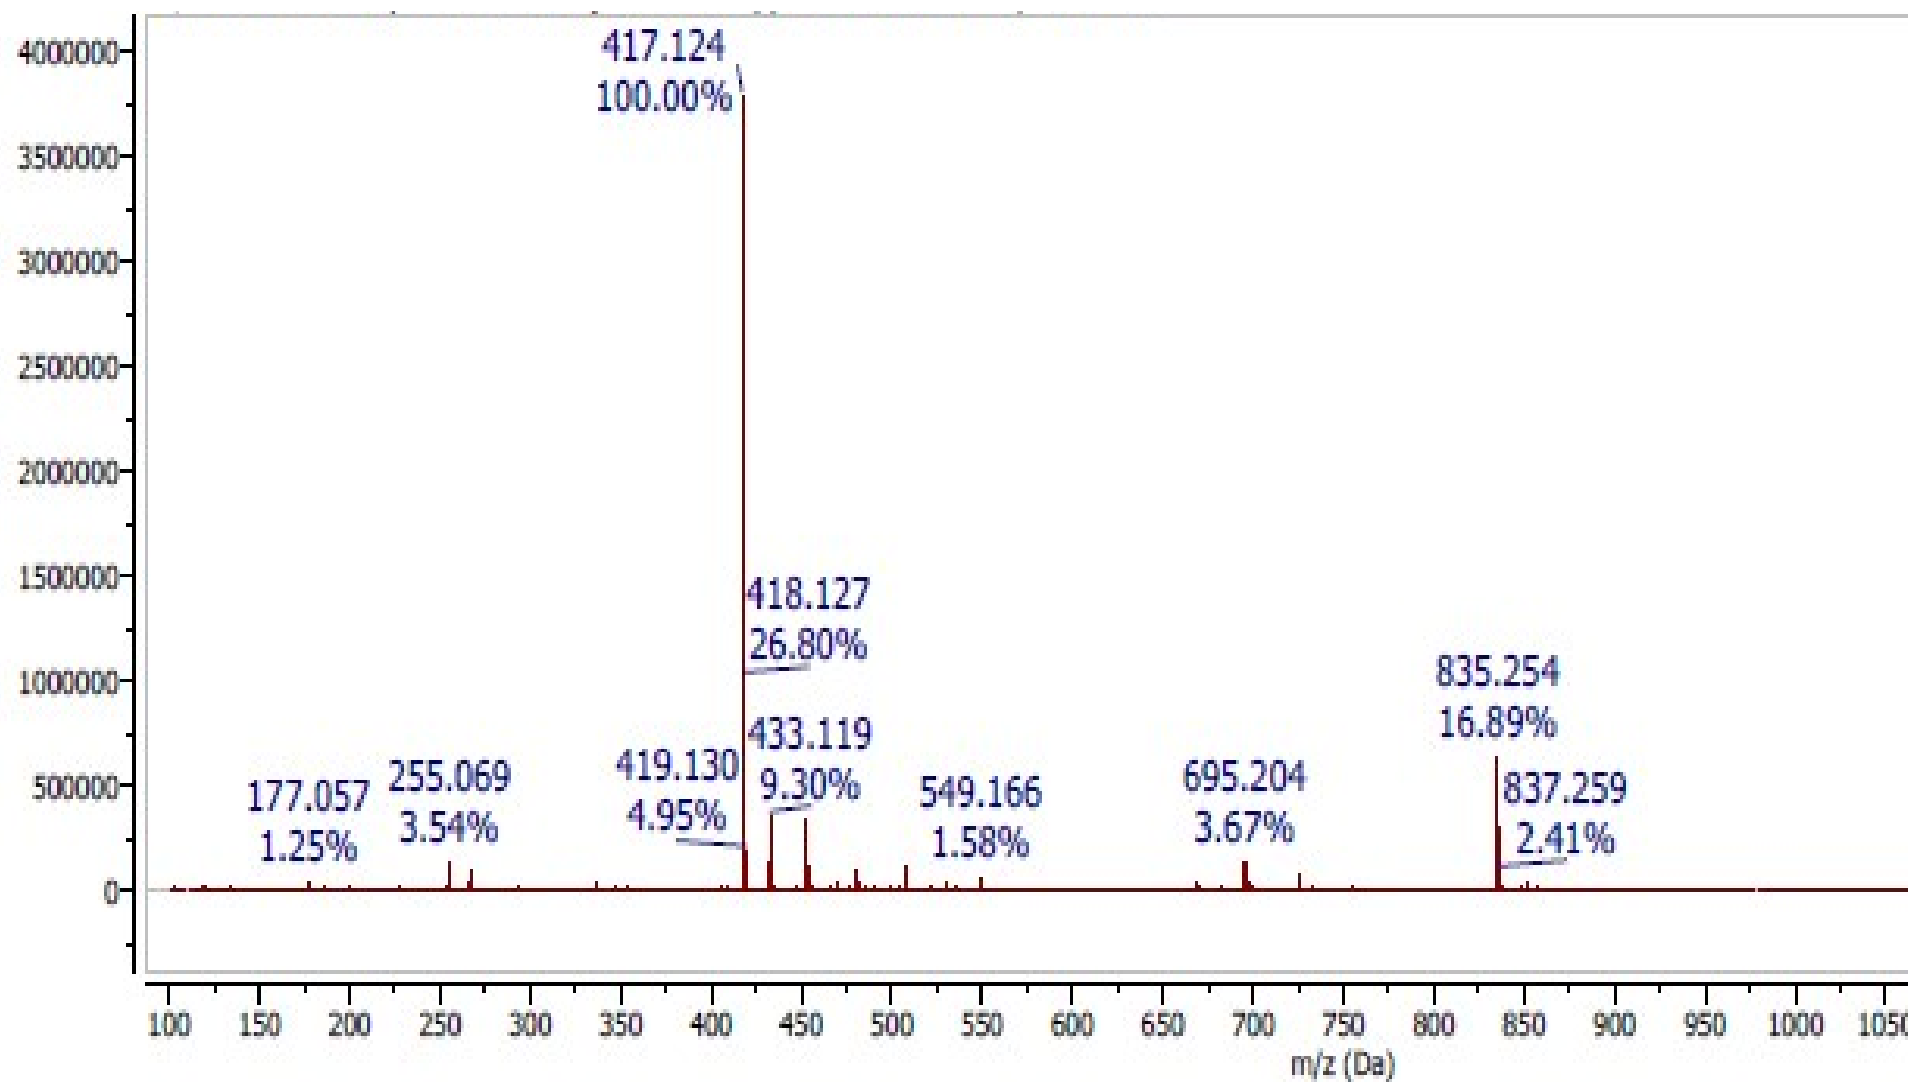

Fig. S16 HRESIMS spectrum of liquirtin (5) in negative mode

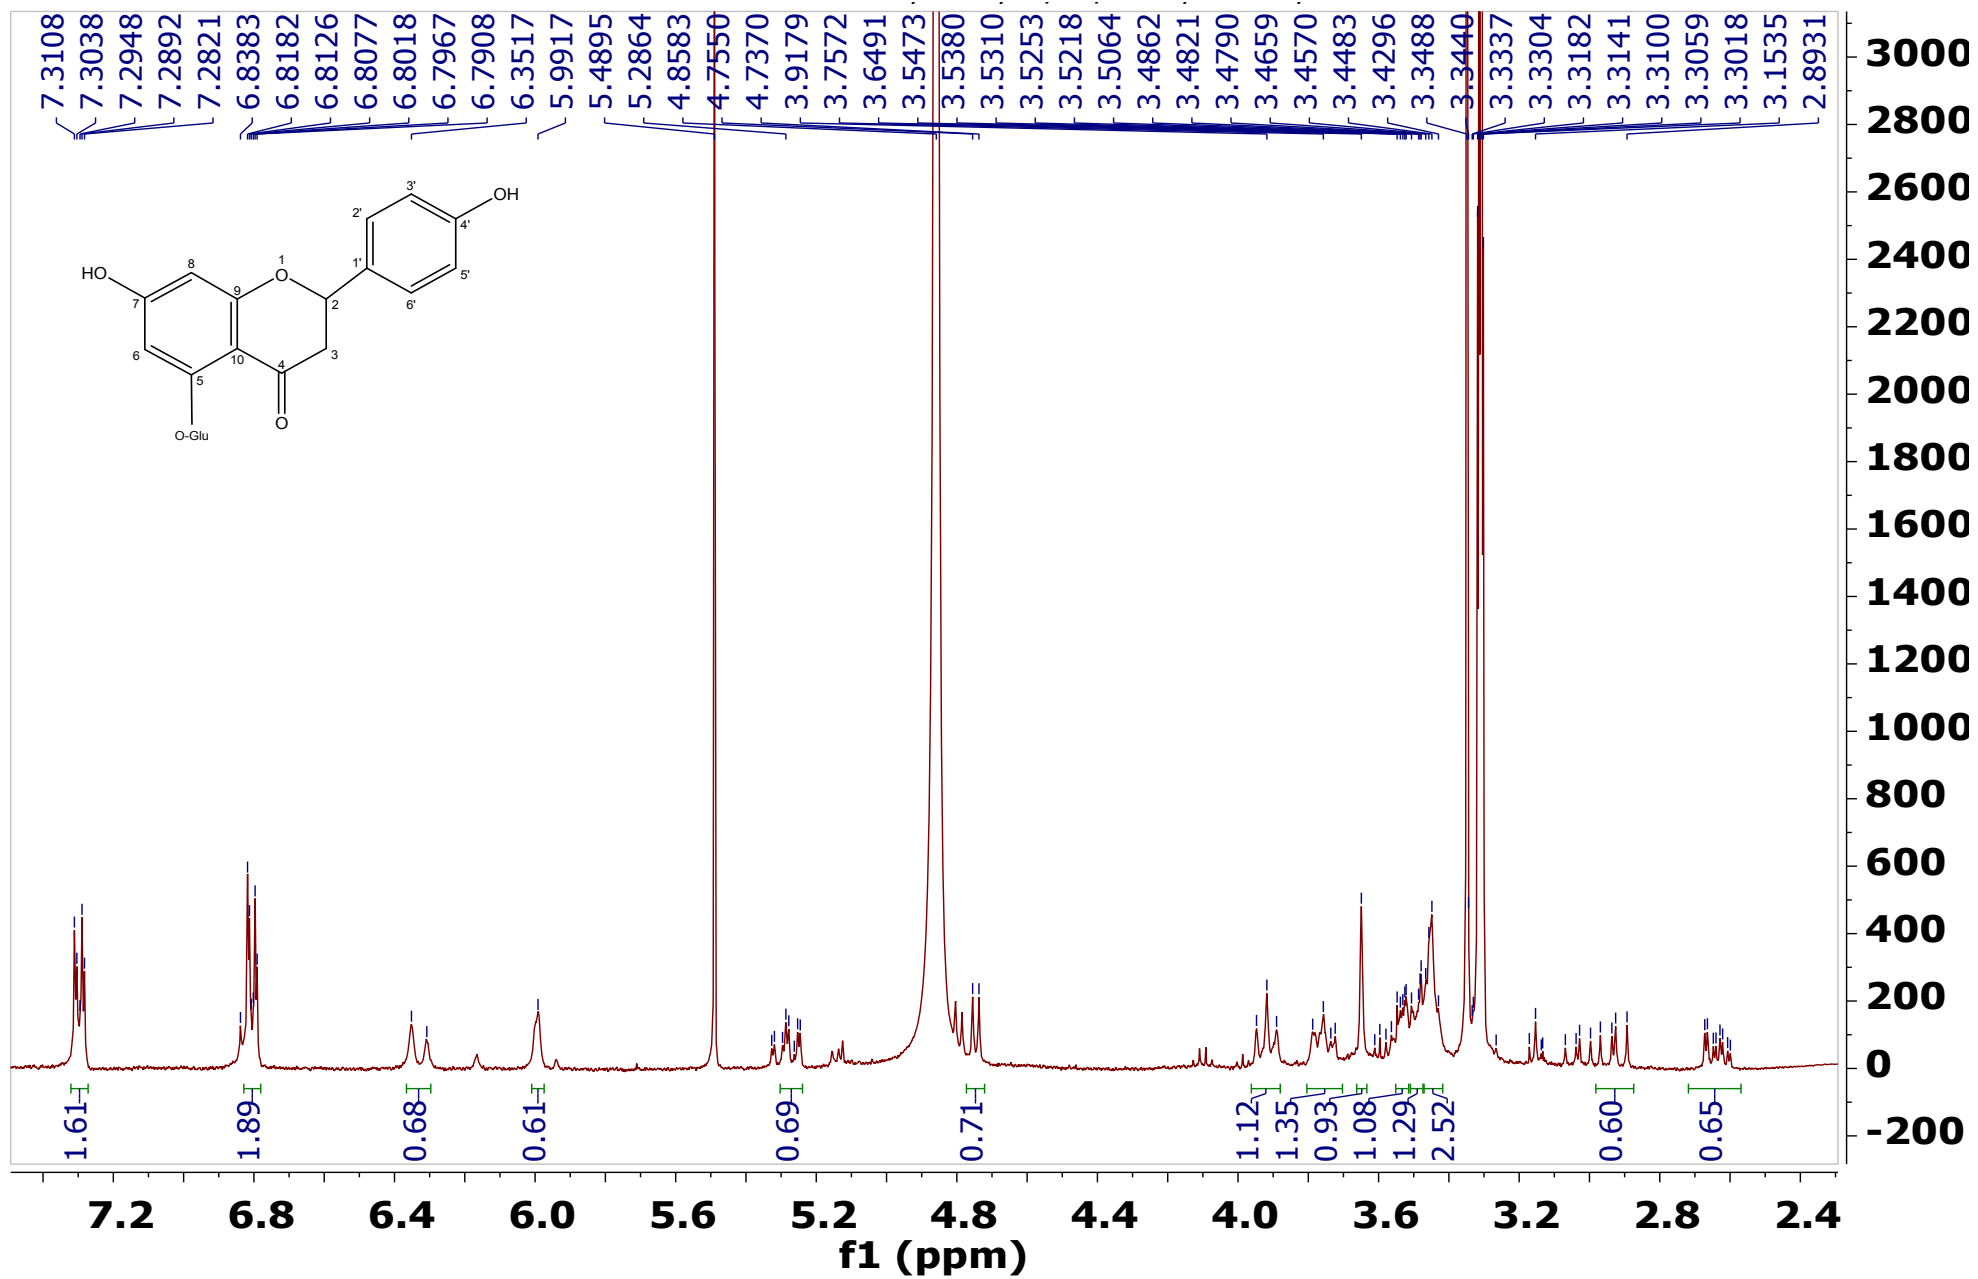

Fig. S17 <sup>1</sup>H-NMR spectrum of naringenin 5-O-glucoside (6) in CD<sub>3</sub>OD at 400 MHz

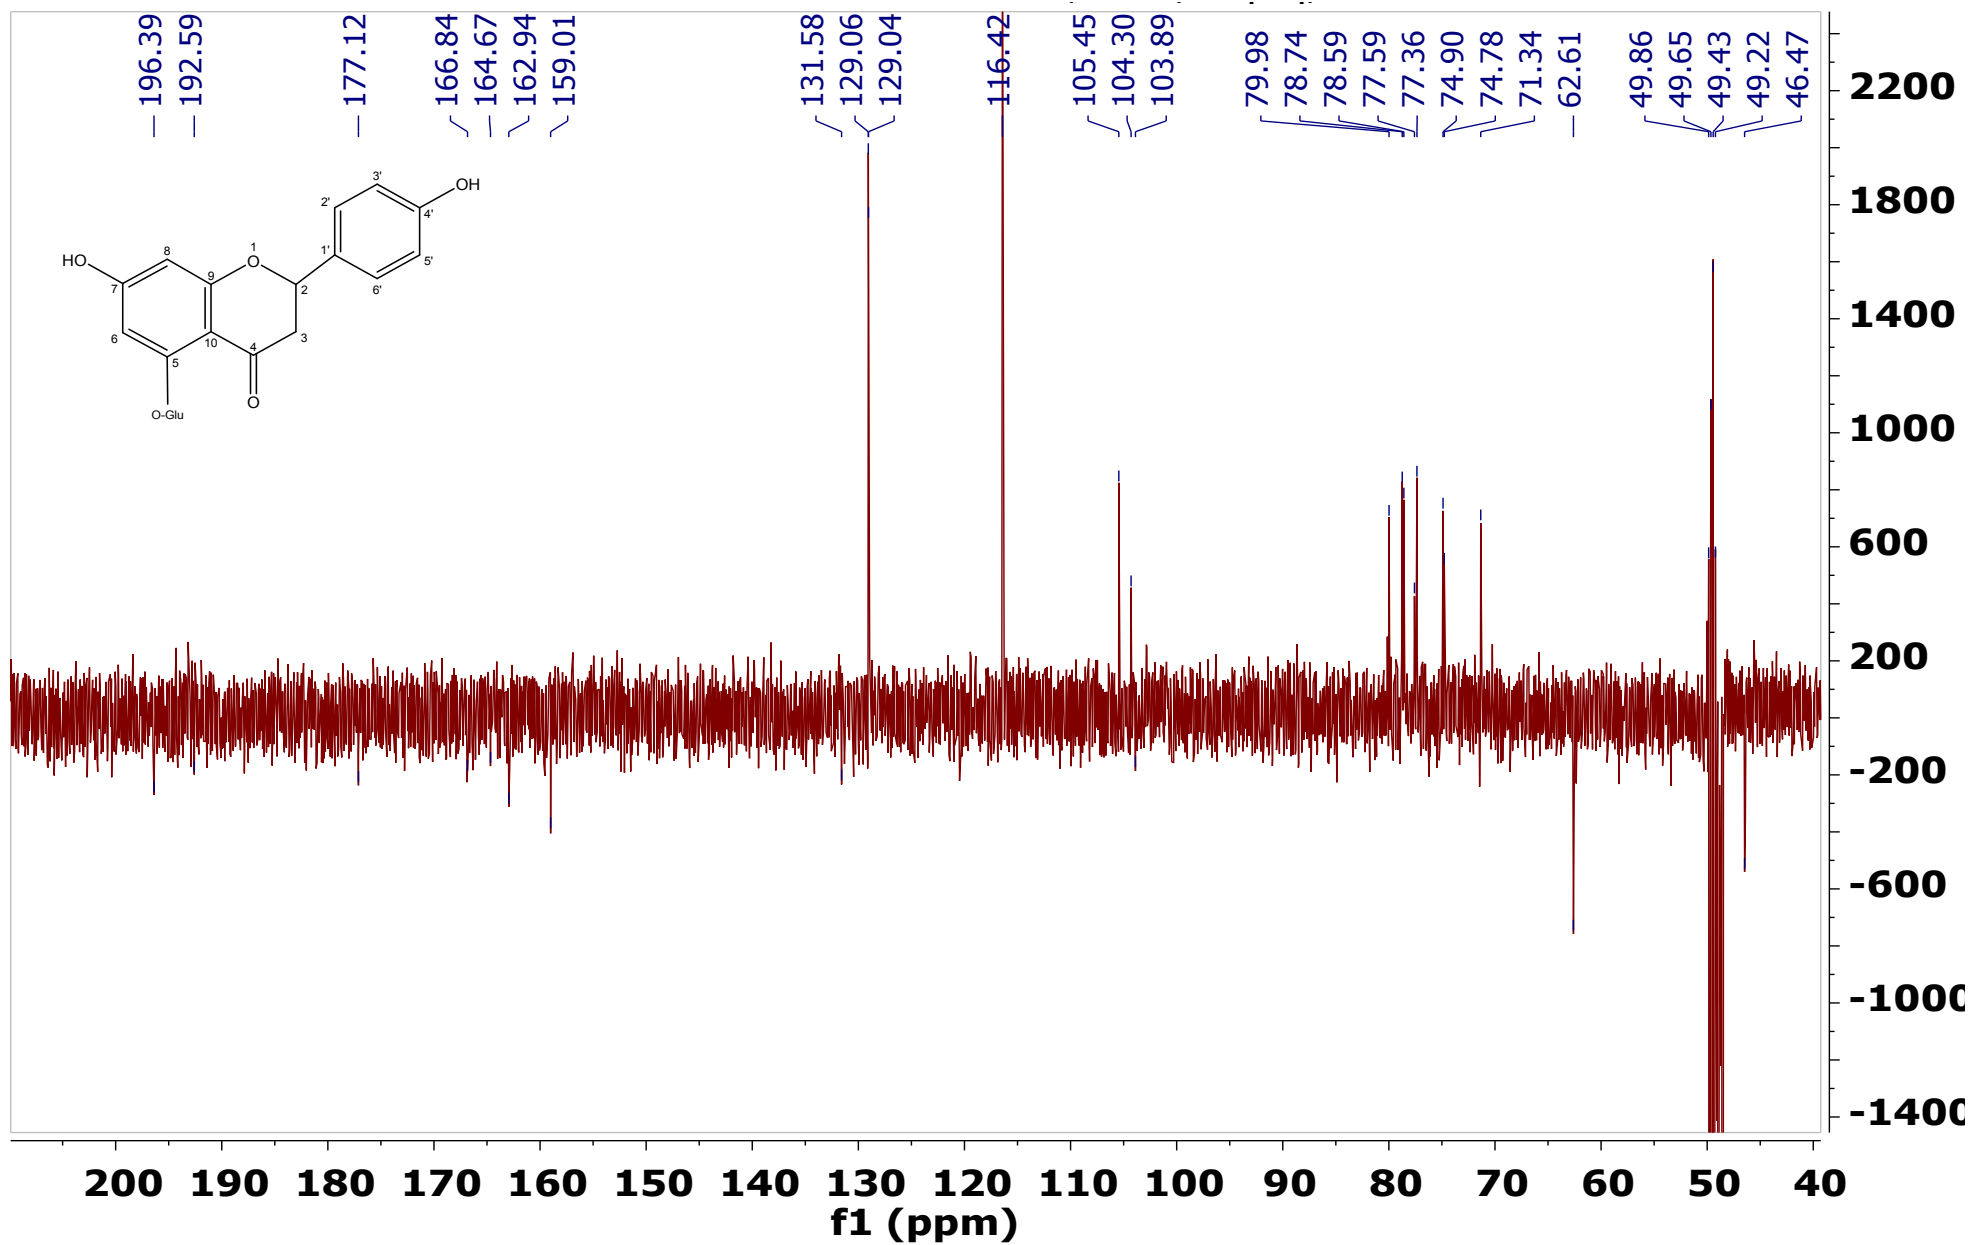

Fig. S18  $^{13}\text{C}$ -DEPTQ spectrum of naringenin 5-O-glucoside (6) in  $\text{CD}_3\text{OD}$  at 100 MHz

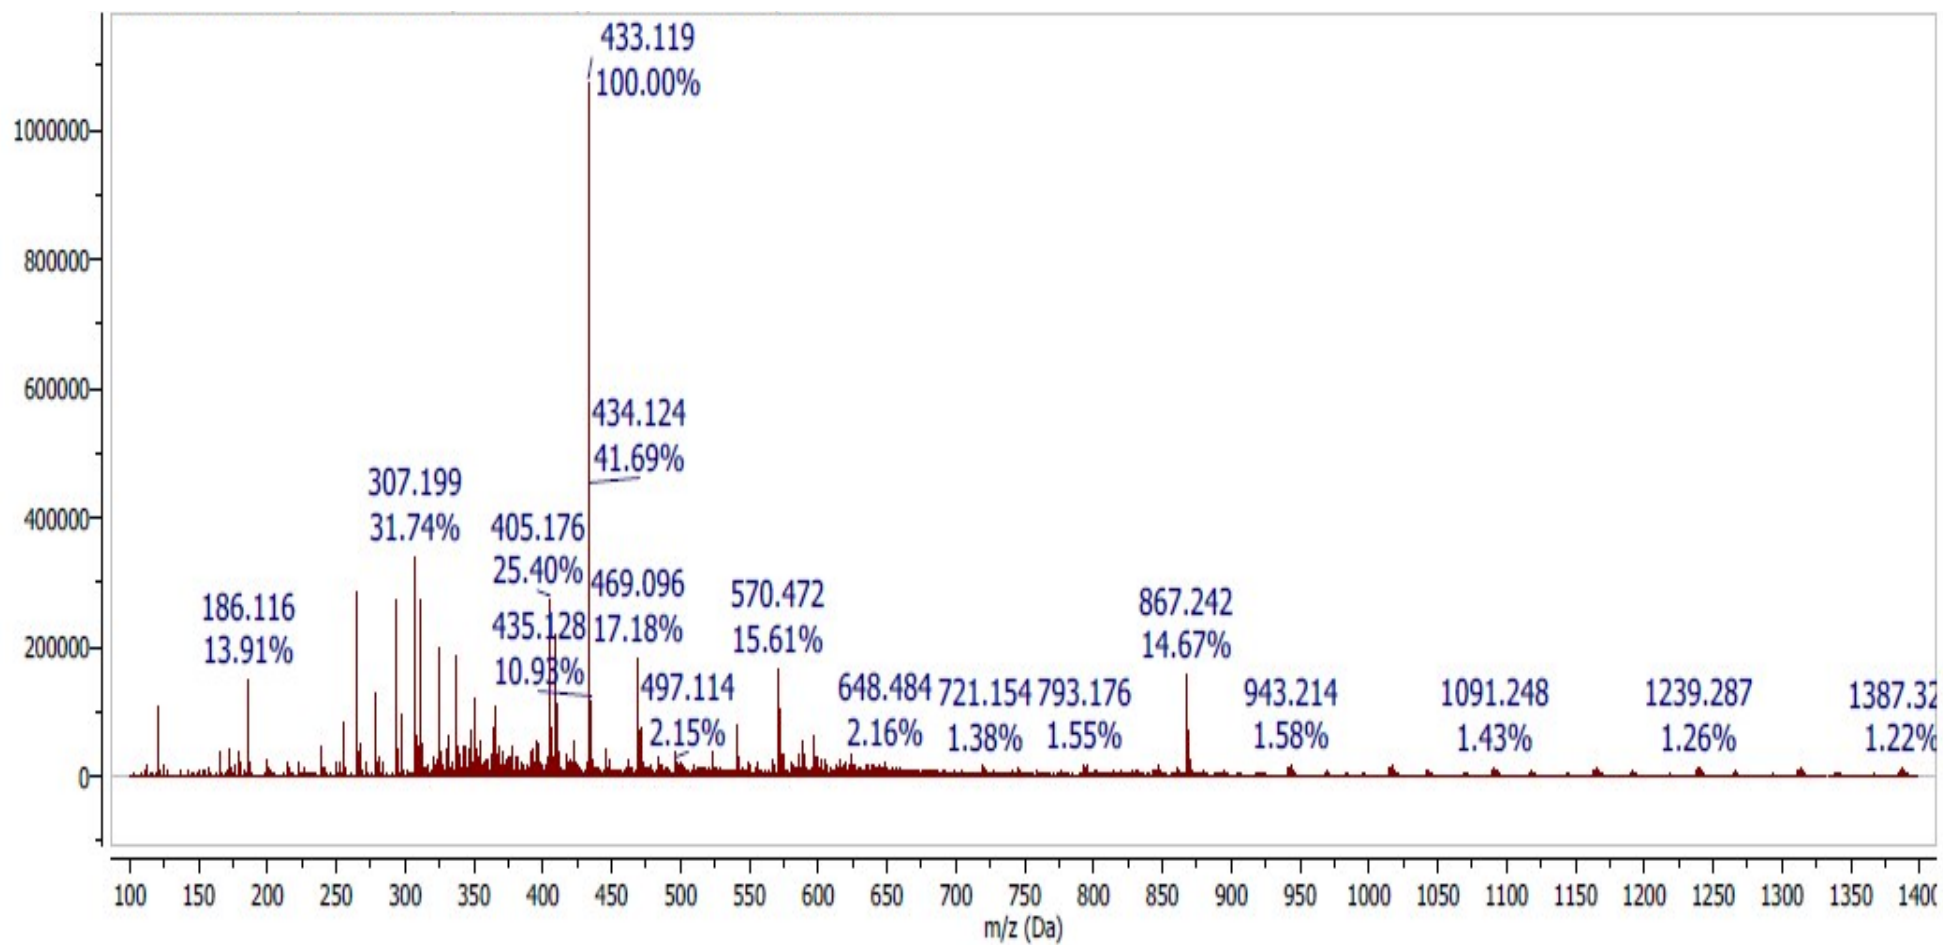

**Fig. S19** HRESIMS spectrum of naringenin 5-O-glucoside (6) in negative mode



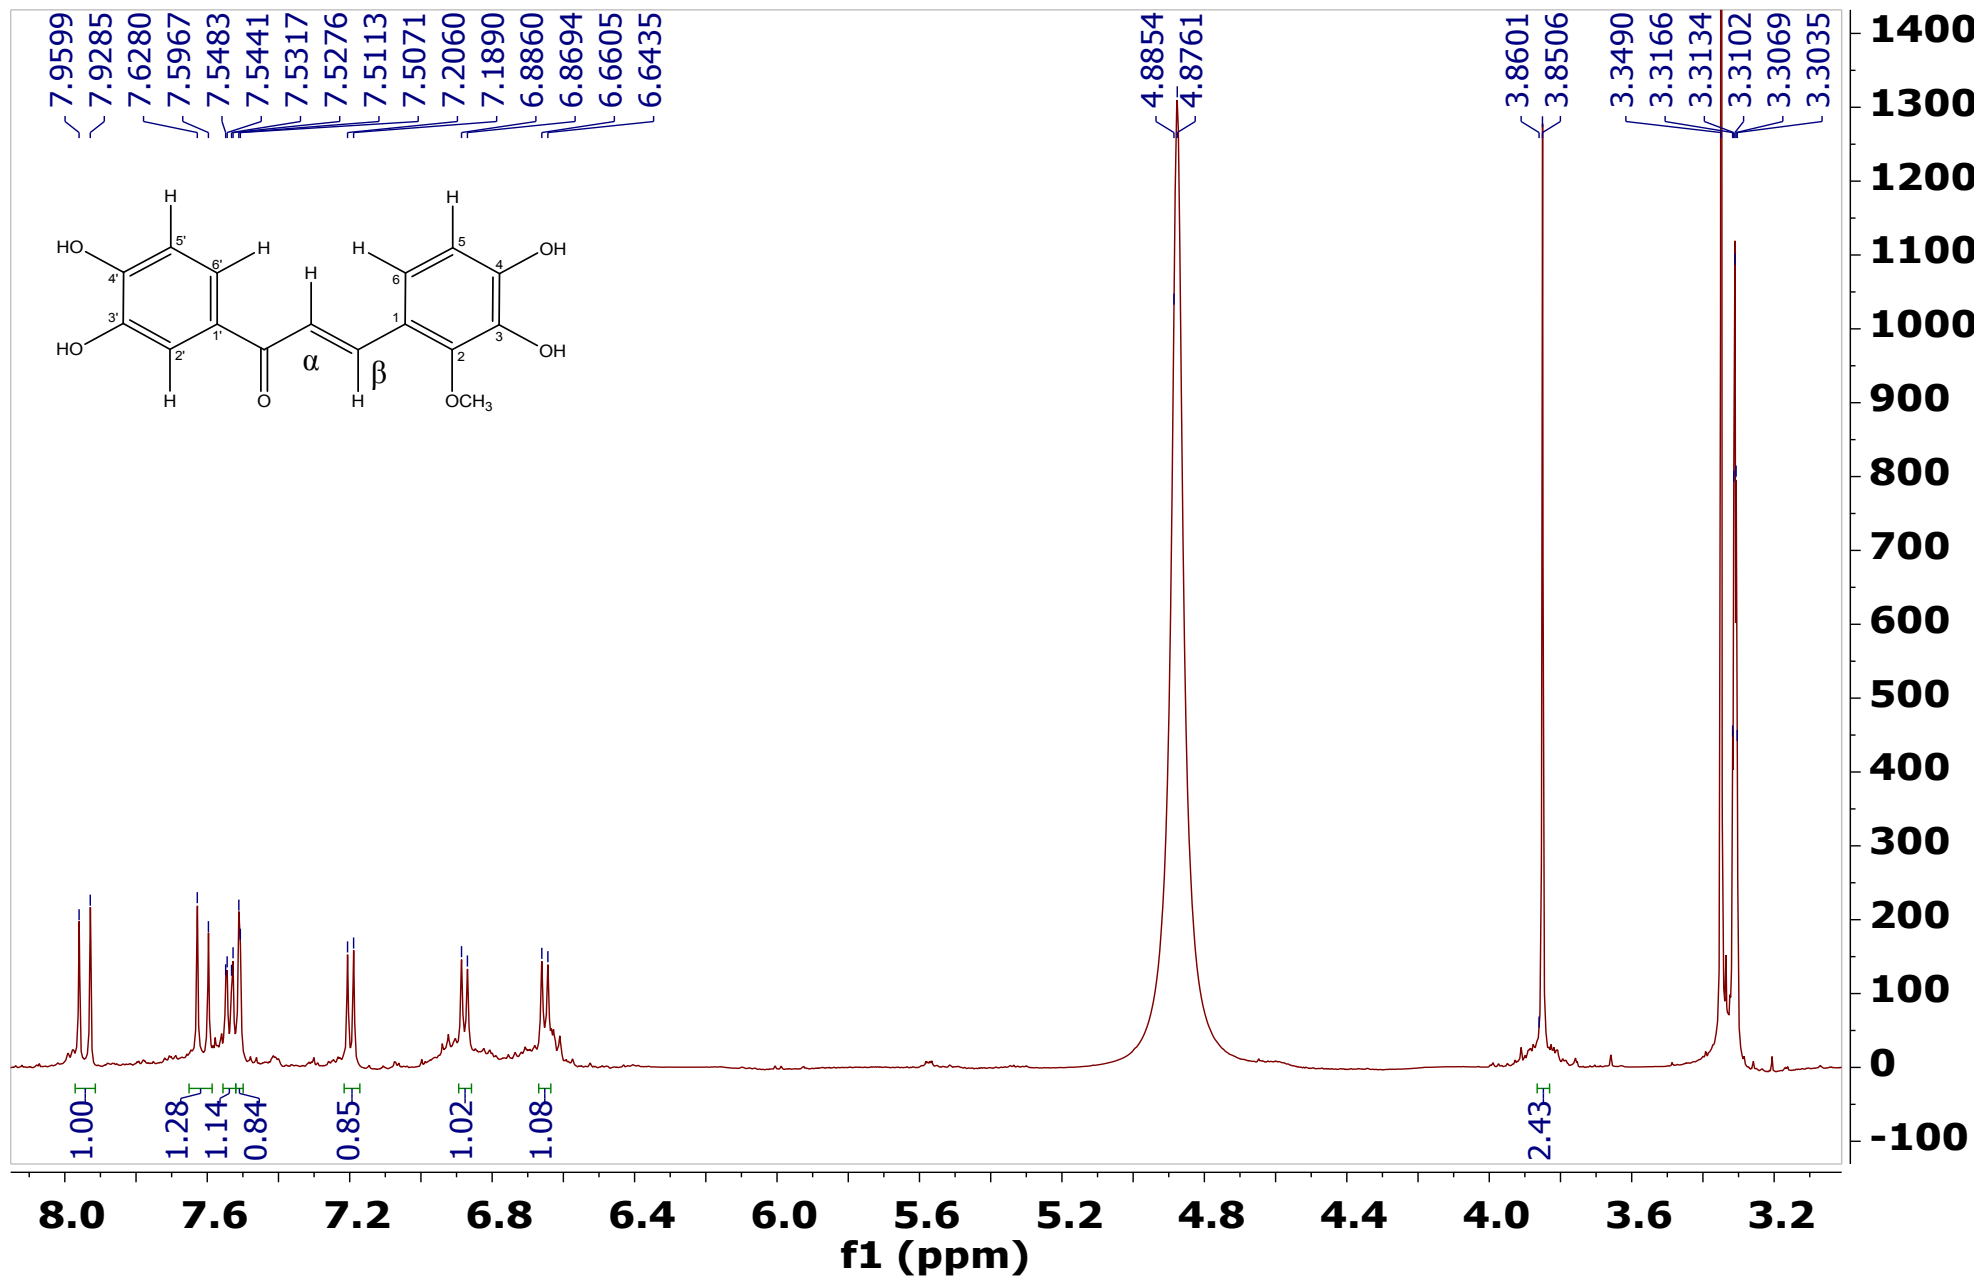

Fig. S20  $^1\text{H-NMR}$  spectrum of 3,3',4,4'-tetrahydroxy-2-methoxychalcone (7) in  $\text{CD}_3\text{OD}$  at 400 MHz

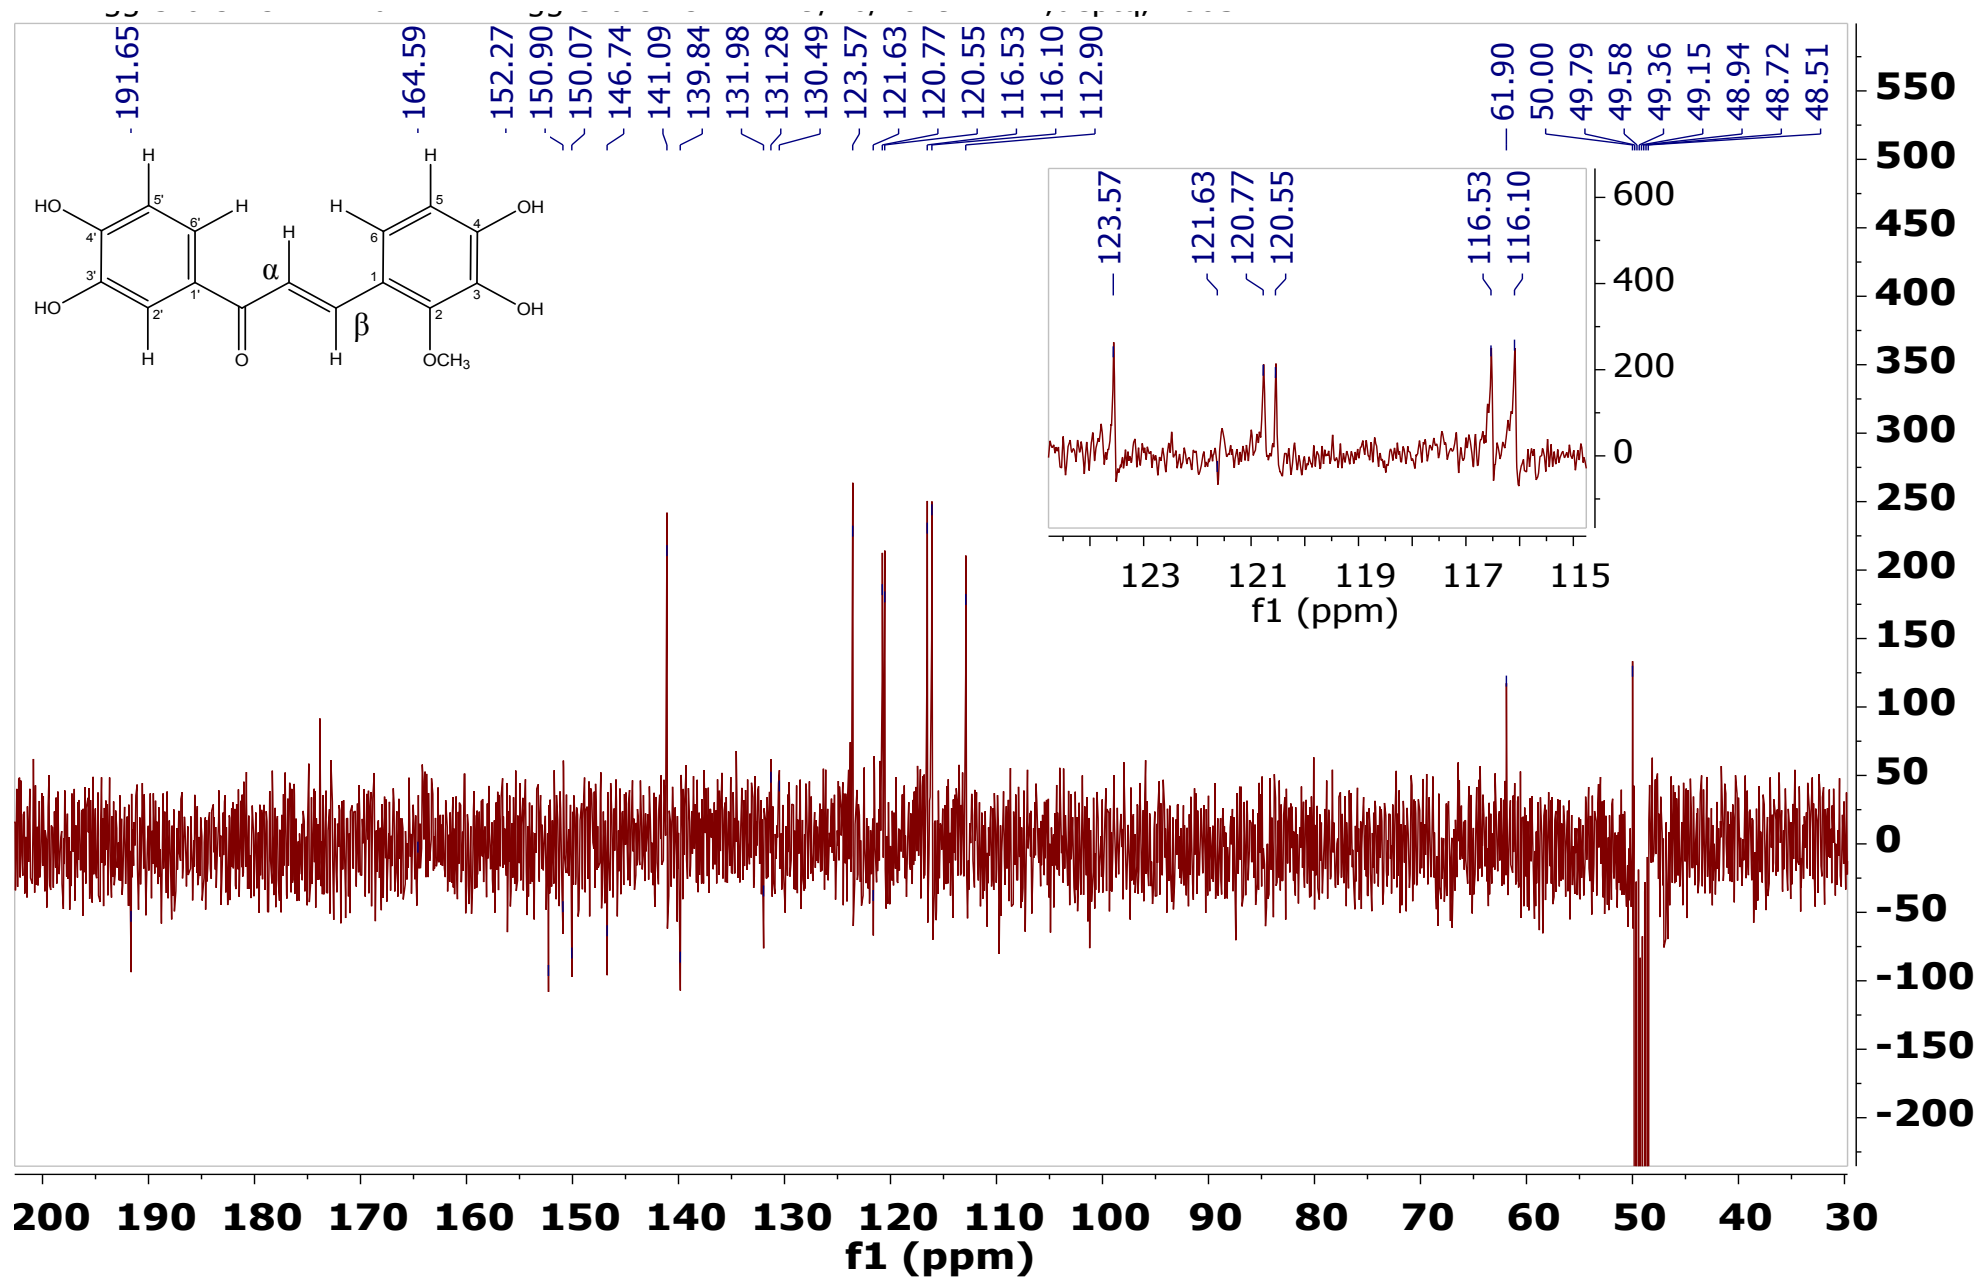

Fig. S21 <sup>13</sup>C-DEPTQ spectrum of 3,3',4,4'-tetrahydroxy-2-methoxychalcone (7) in CD<sub>3</sub>OD at 100 MHz with expansion at (115- 123 ppm)

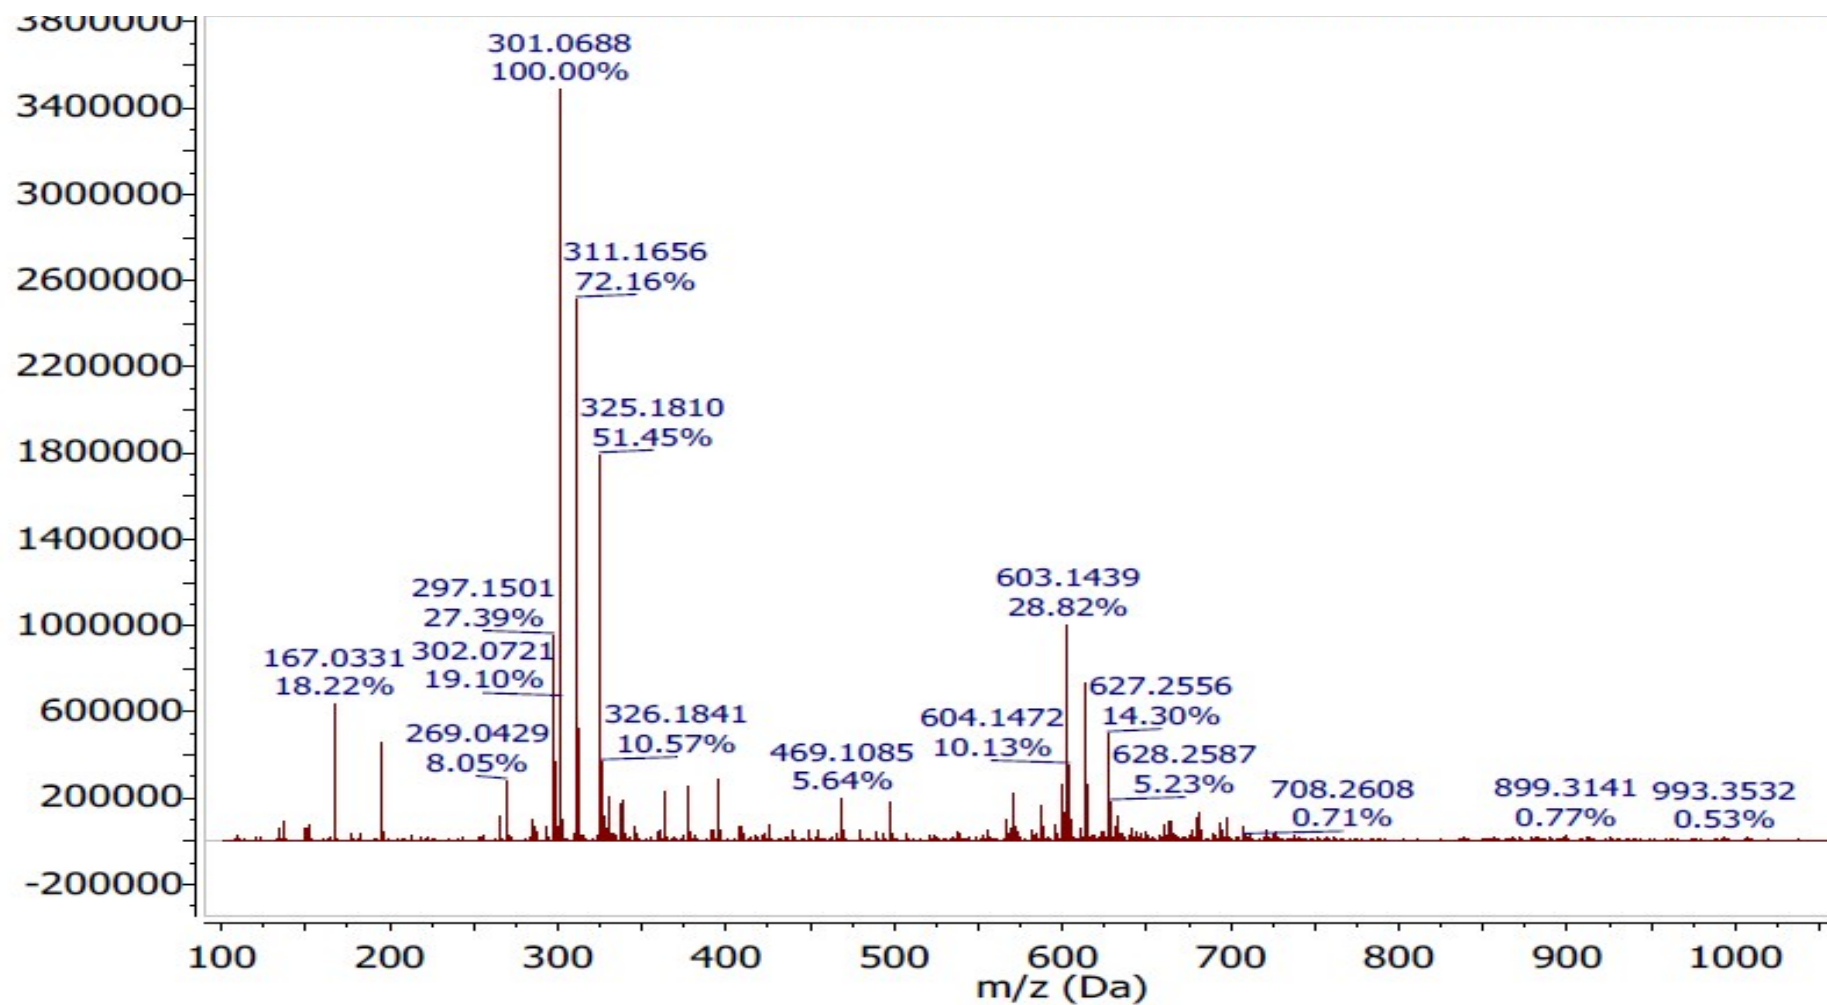

Fig. S22 HRESIMS spectrum of 3,3',4,4'-tetrahydroxy-2-methoxychalcone (7) in negative mode

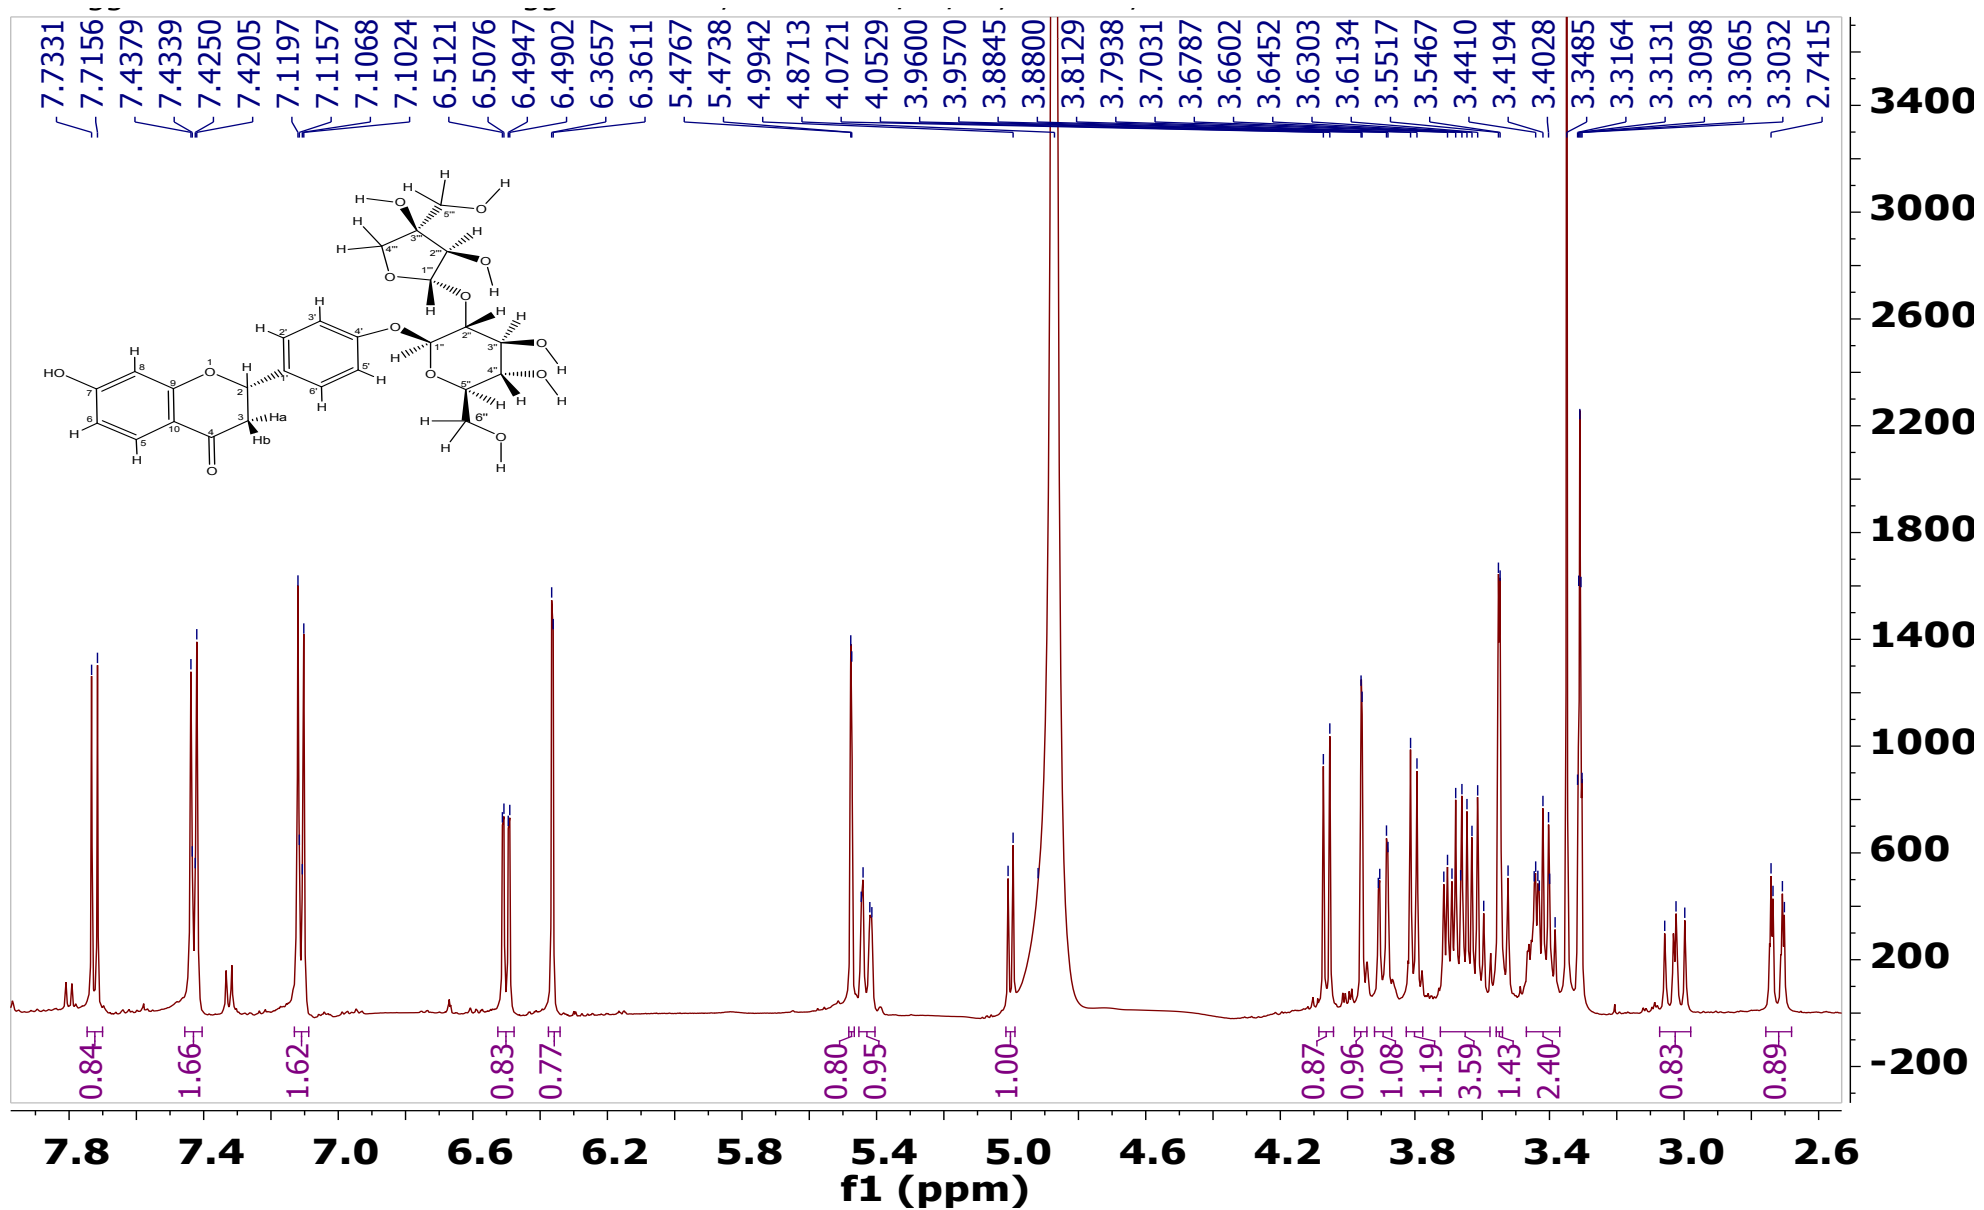

Fig. S23 <sup>1</sup>H-NMR spectrum of liquiritinapioside (8) in CD<sub>3</sub>OD at 500 MHz

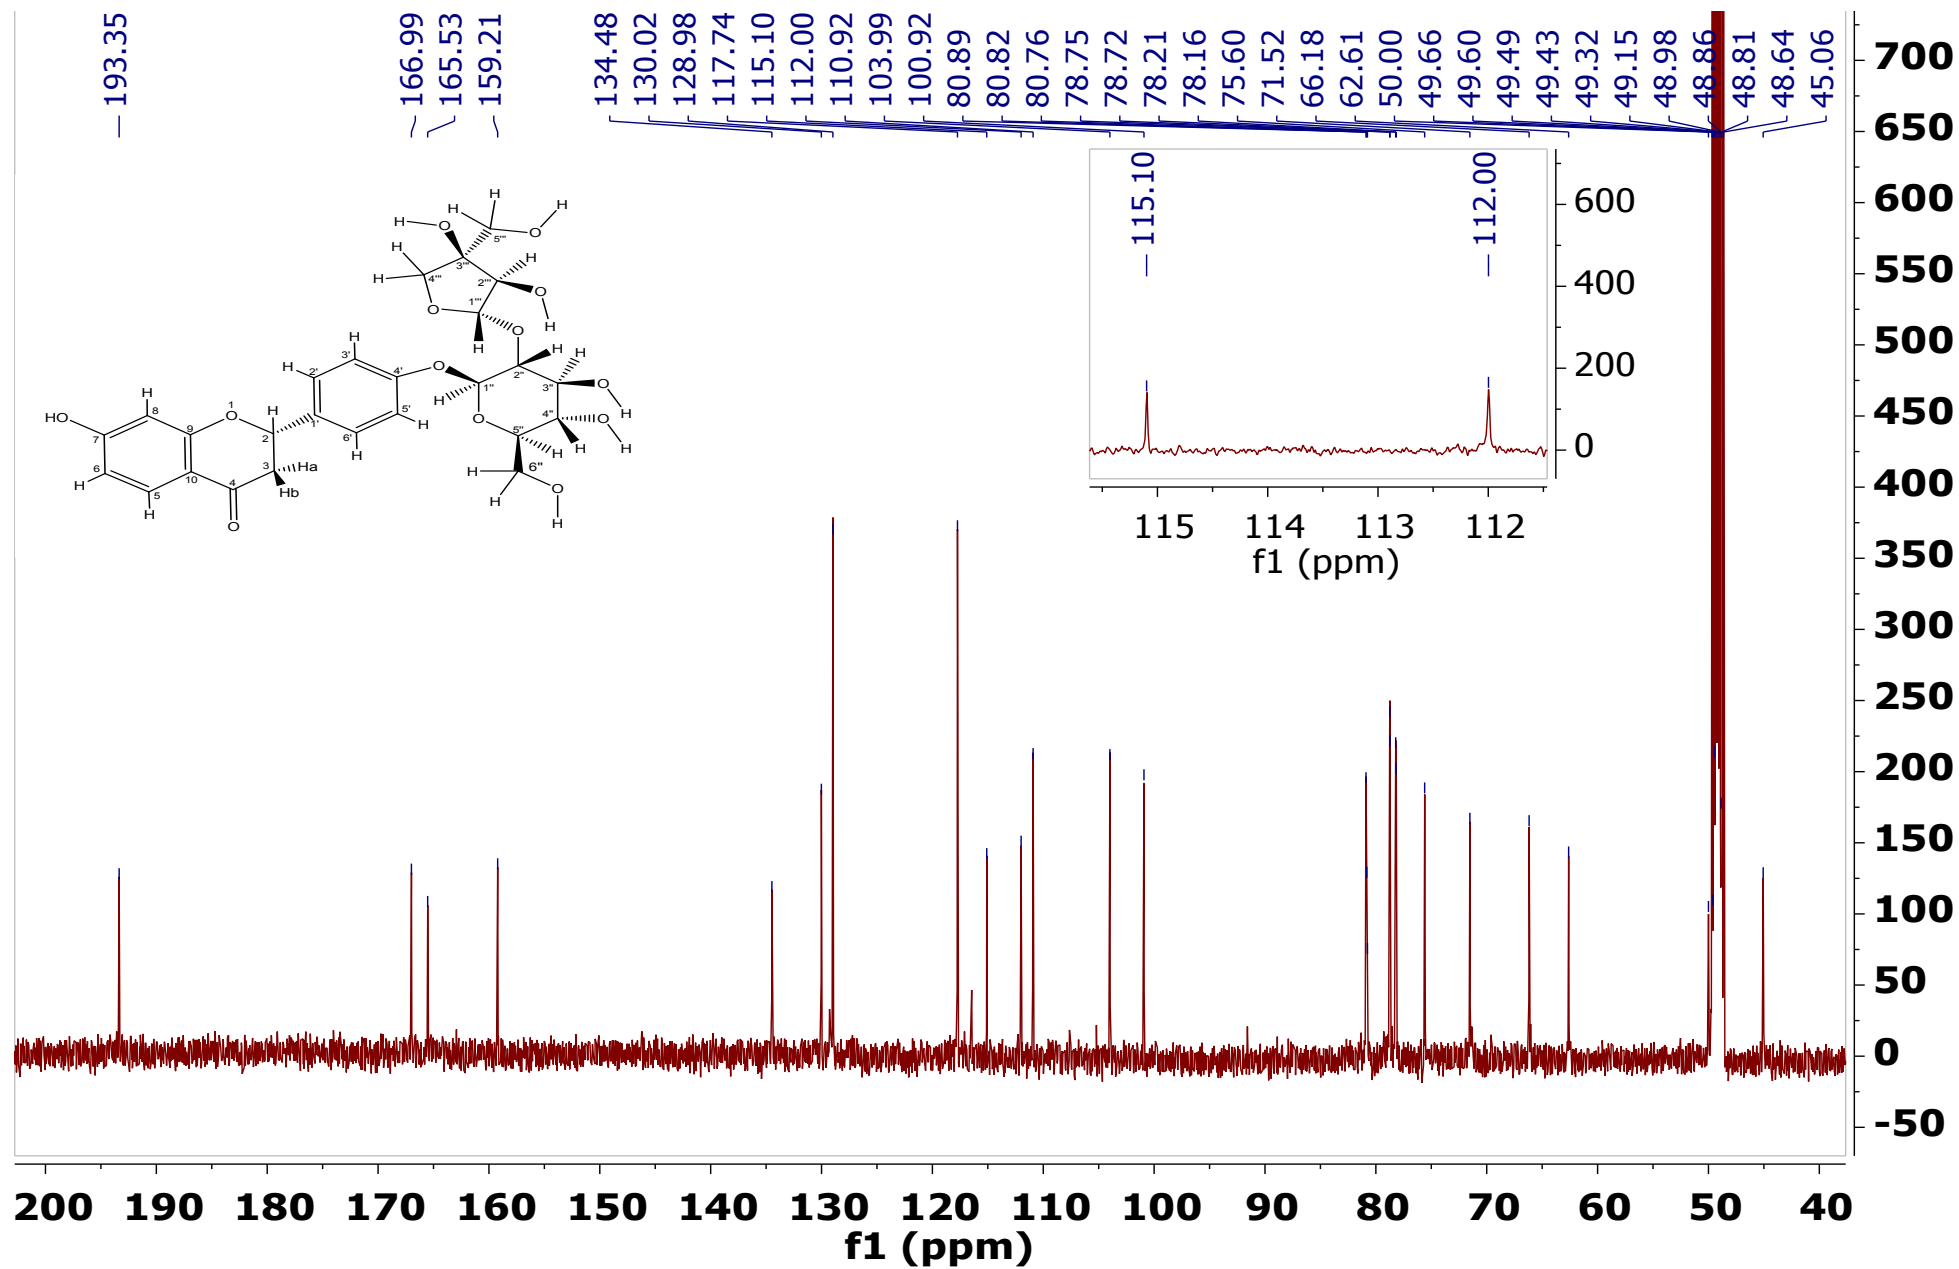

Fig. S24 <sup>13</sup>C-NMR spectrum of liquiritinapioside (8) in CD<sub>3</sub>OD at 125 MHz with expansion at (112-115 ppm)

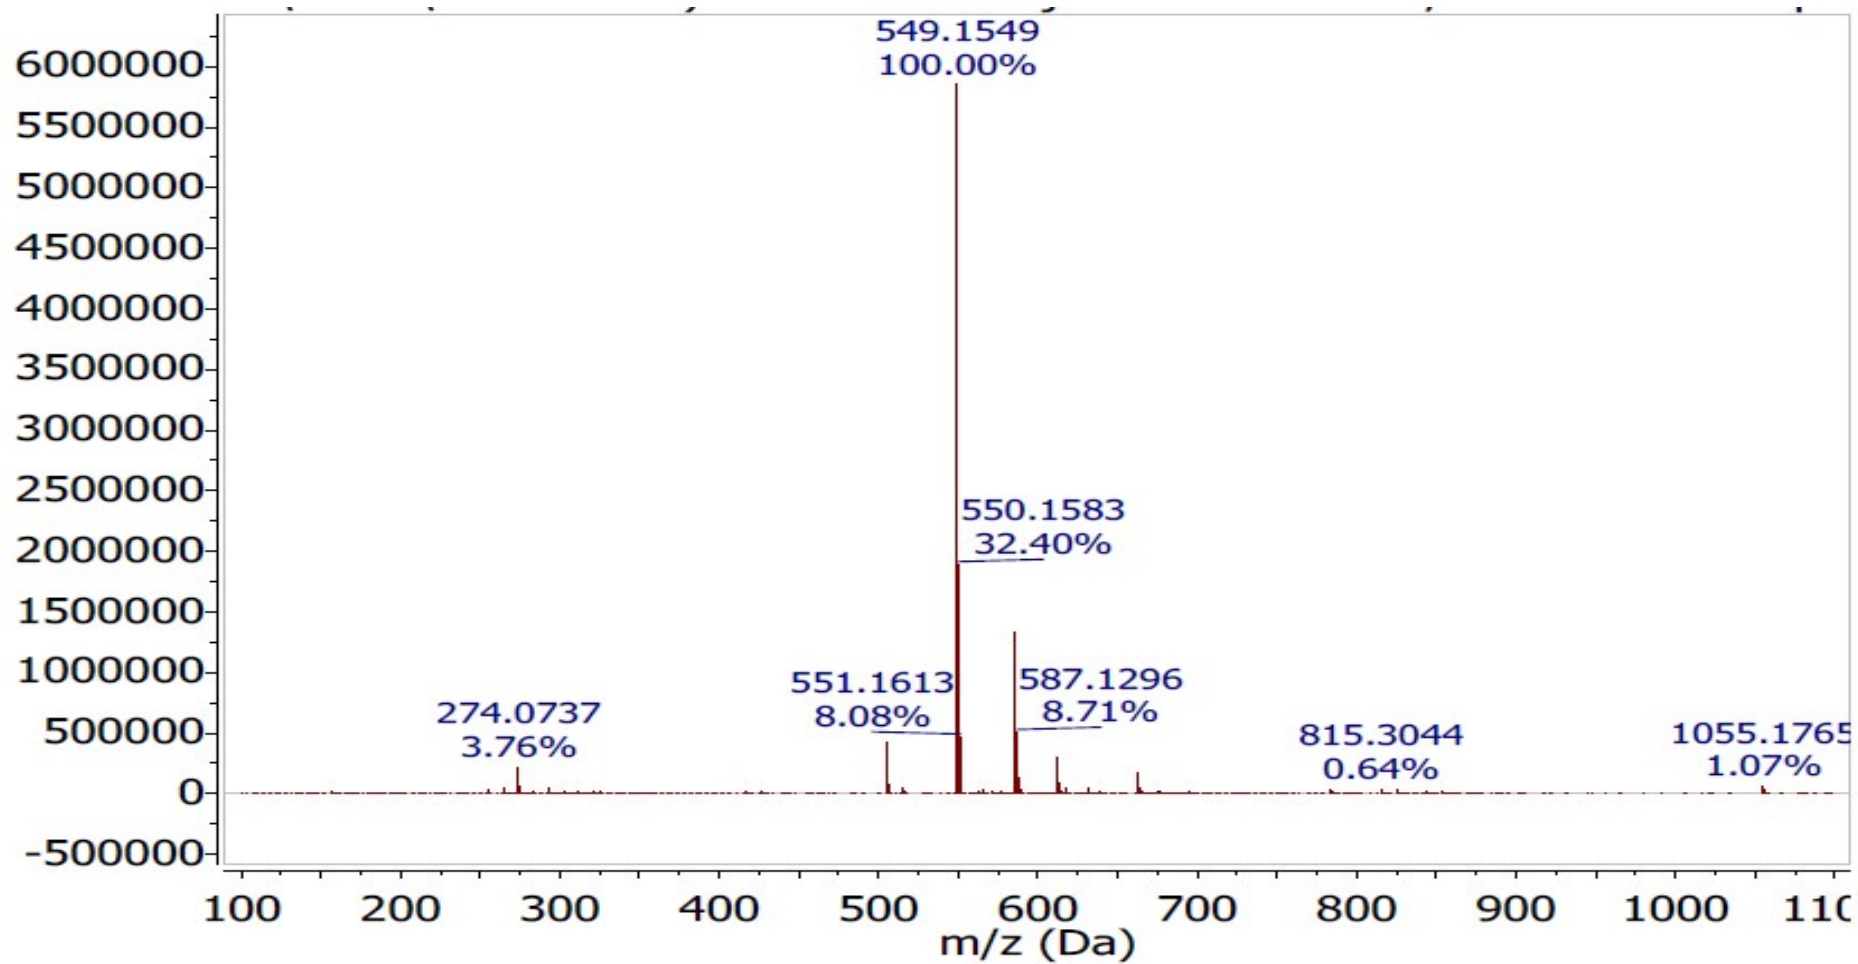

Fig. S25 HRESIMS spectrum of liquiritinapioside (8) in negative mode

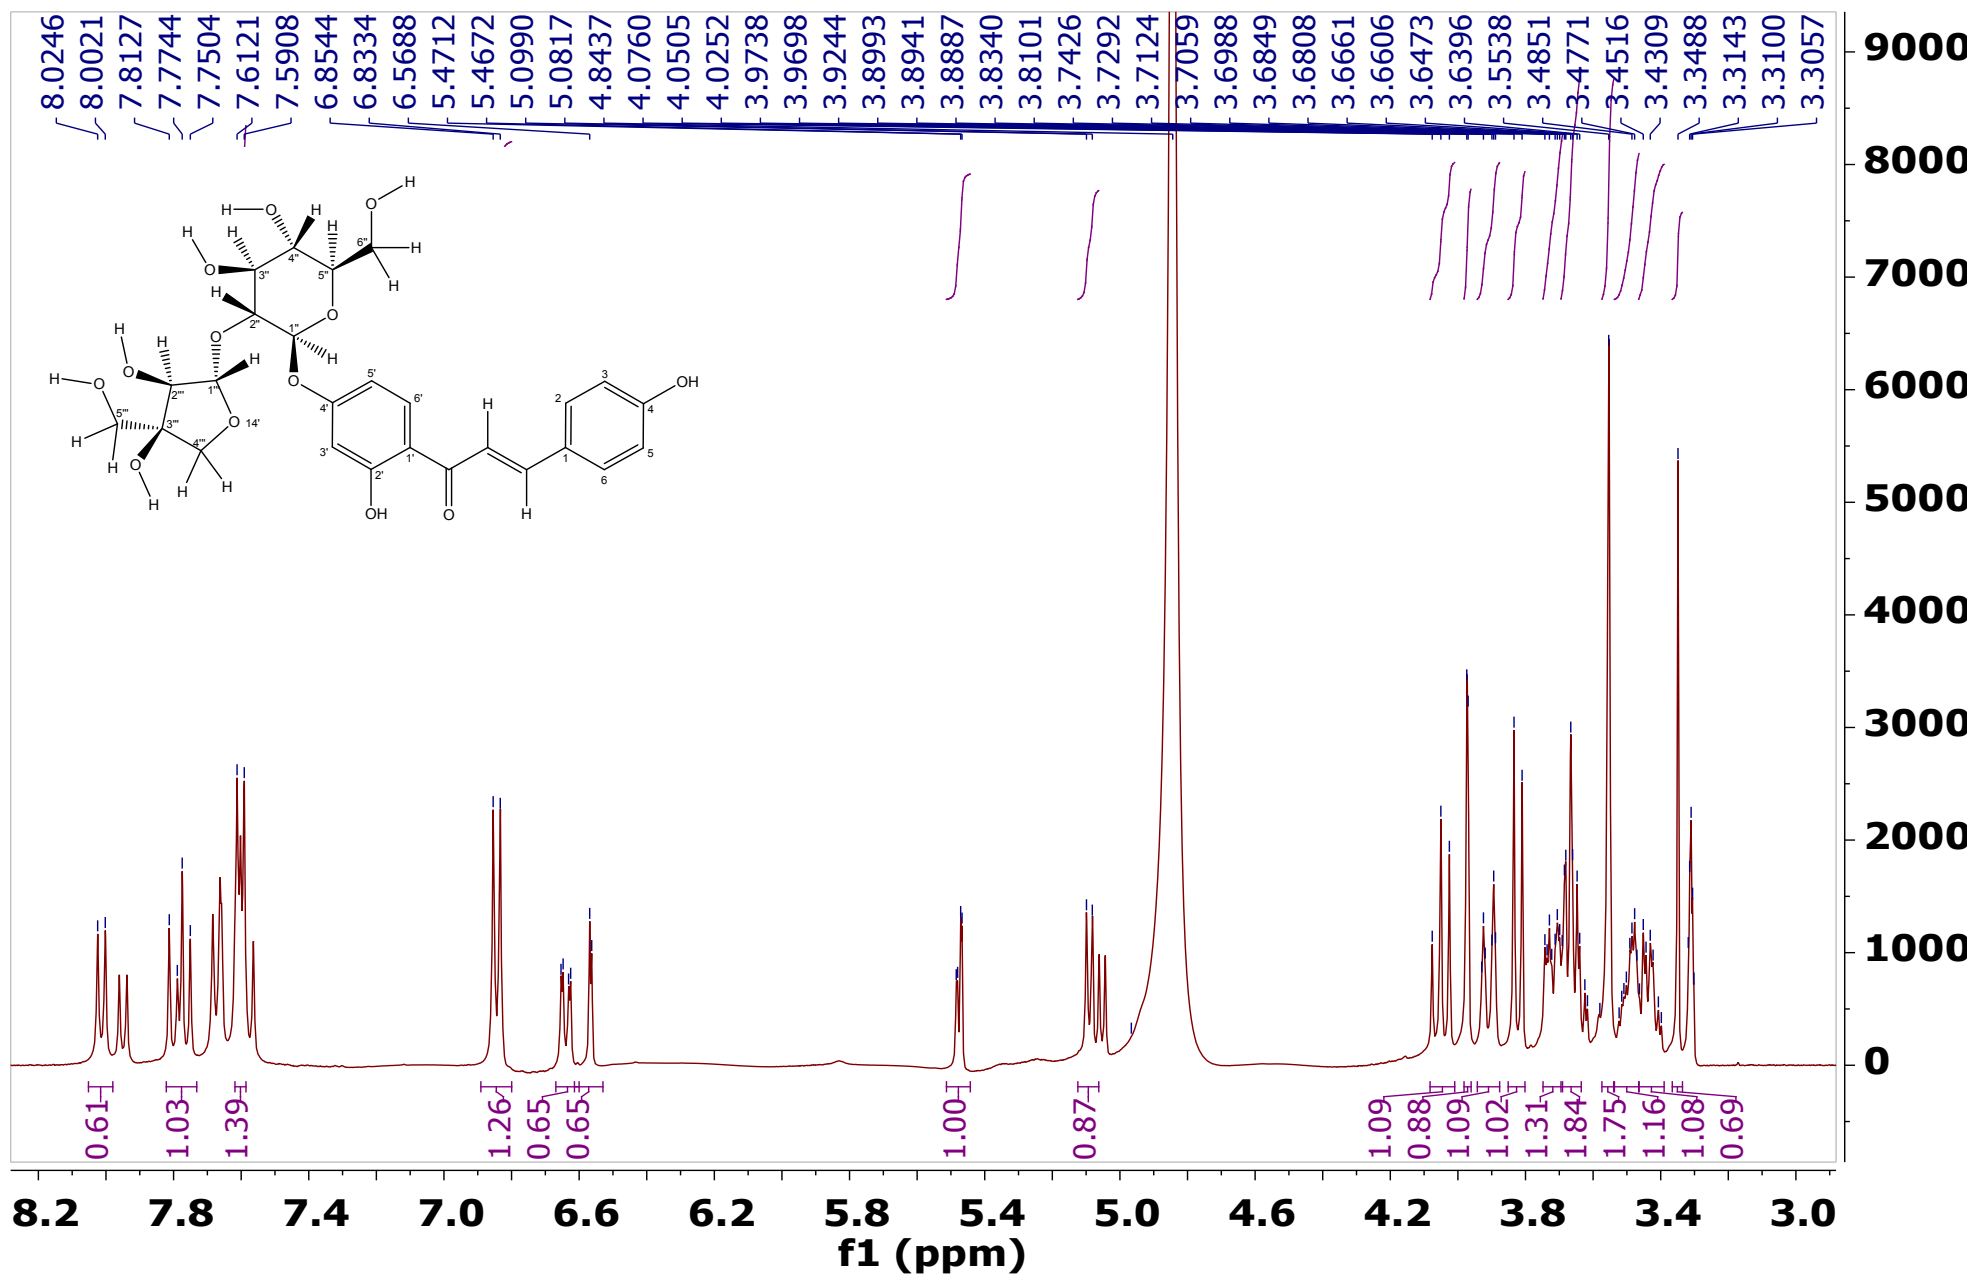

Fig. S26 <sup>1</sup>H-NMR spectrum of isoliquiritigenin-4'-O-β-D-apiosylglucoside (9) in CD<sub>3</sub>OD at 400 MHz

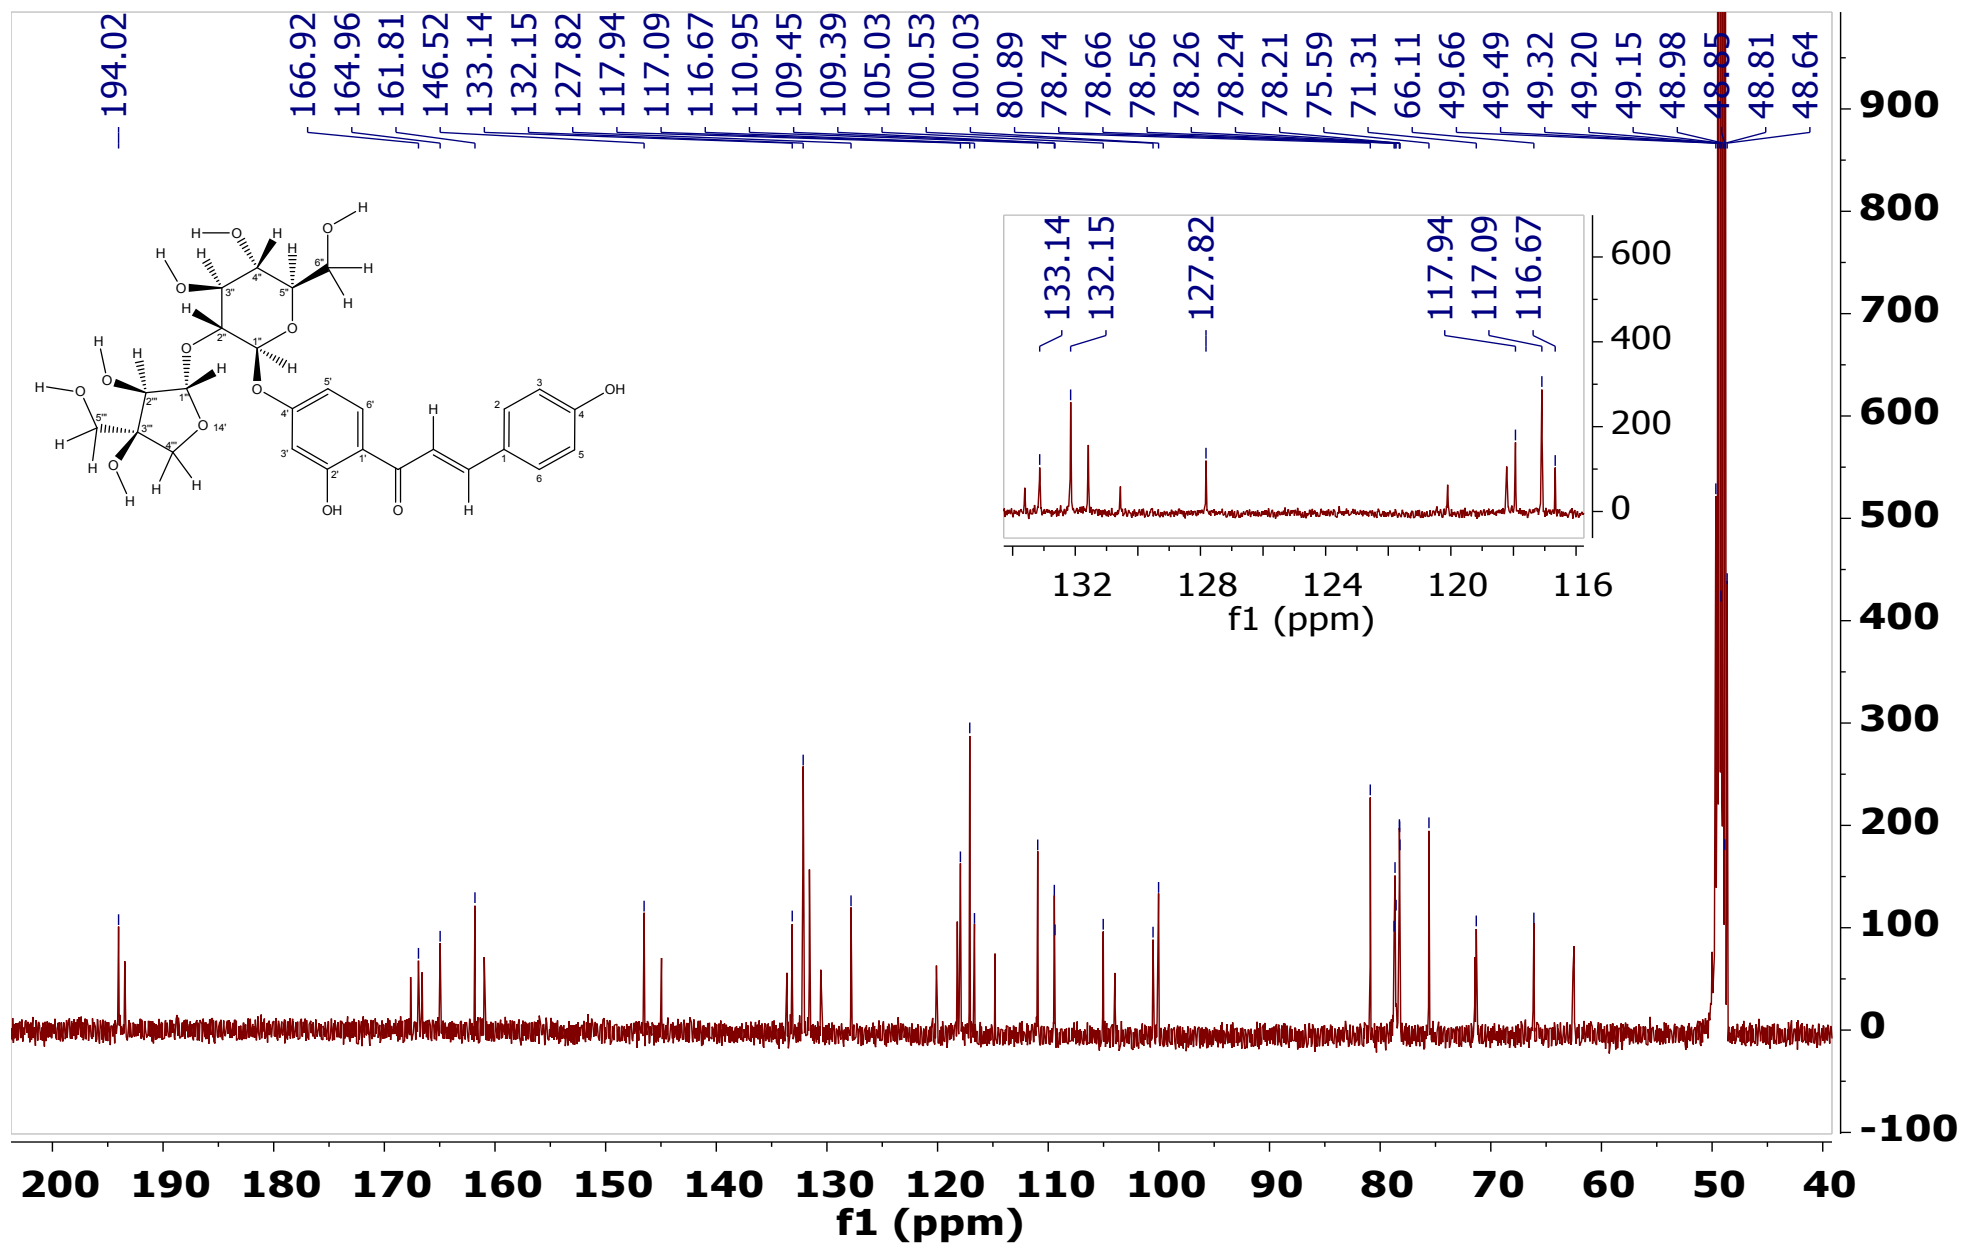

Fig. S27  $^{13}\text{C}$ -NMR spectrum of isoliquiritigenin-4'-O- $\beta$ -D-aposylglucoside (9) in CD<sub>3</sub>OD at 125 MHz with expansion at (115- 130 ppm)



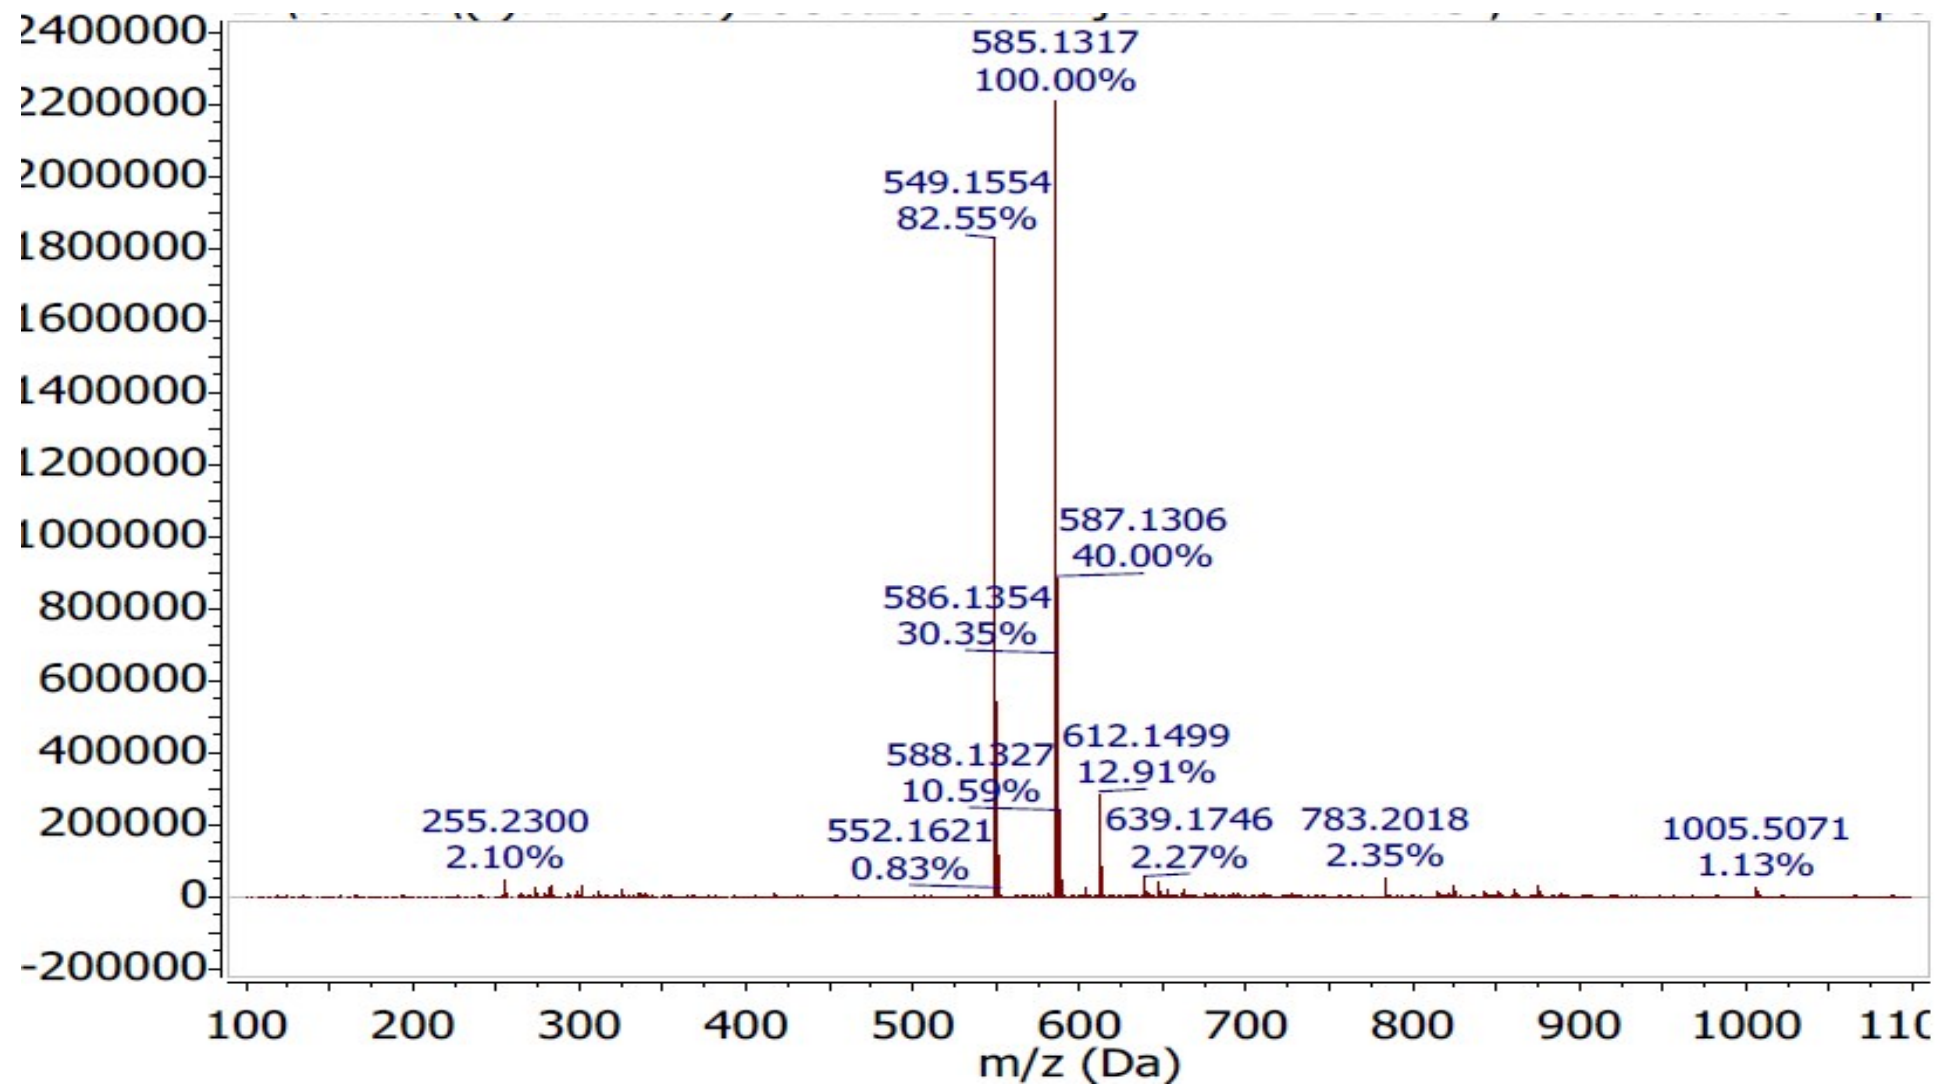

Fig. S28 HRESIMS spectrum of isoliquiritigenin-4'-O-β-D-apiosylglucoside (9) in negative mode

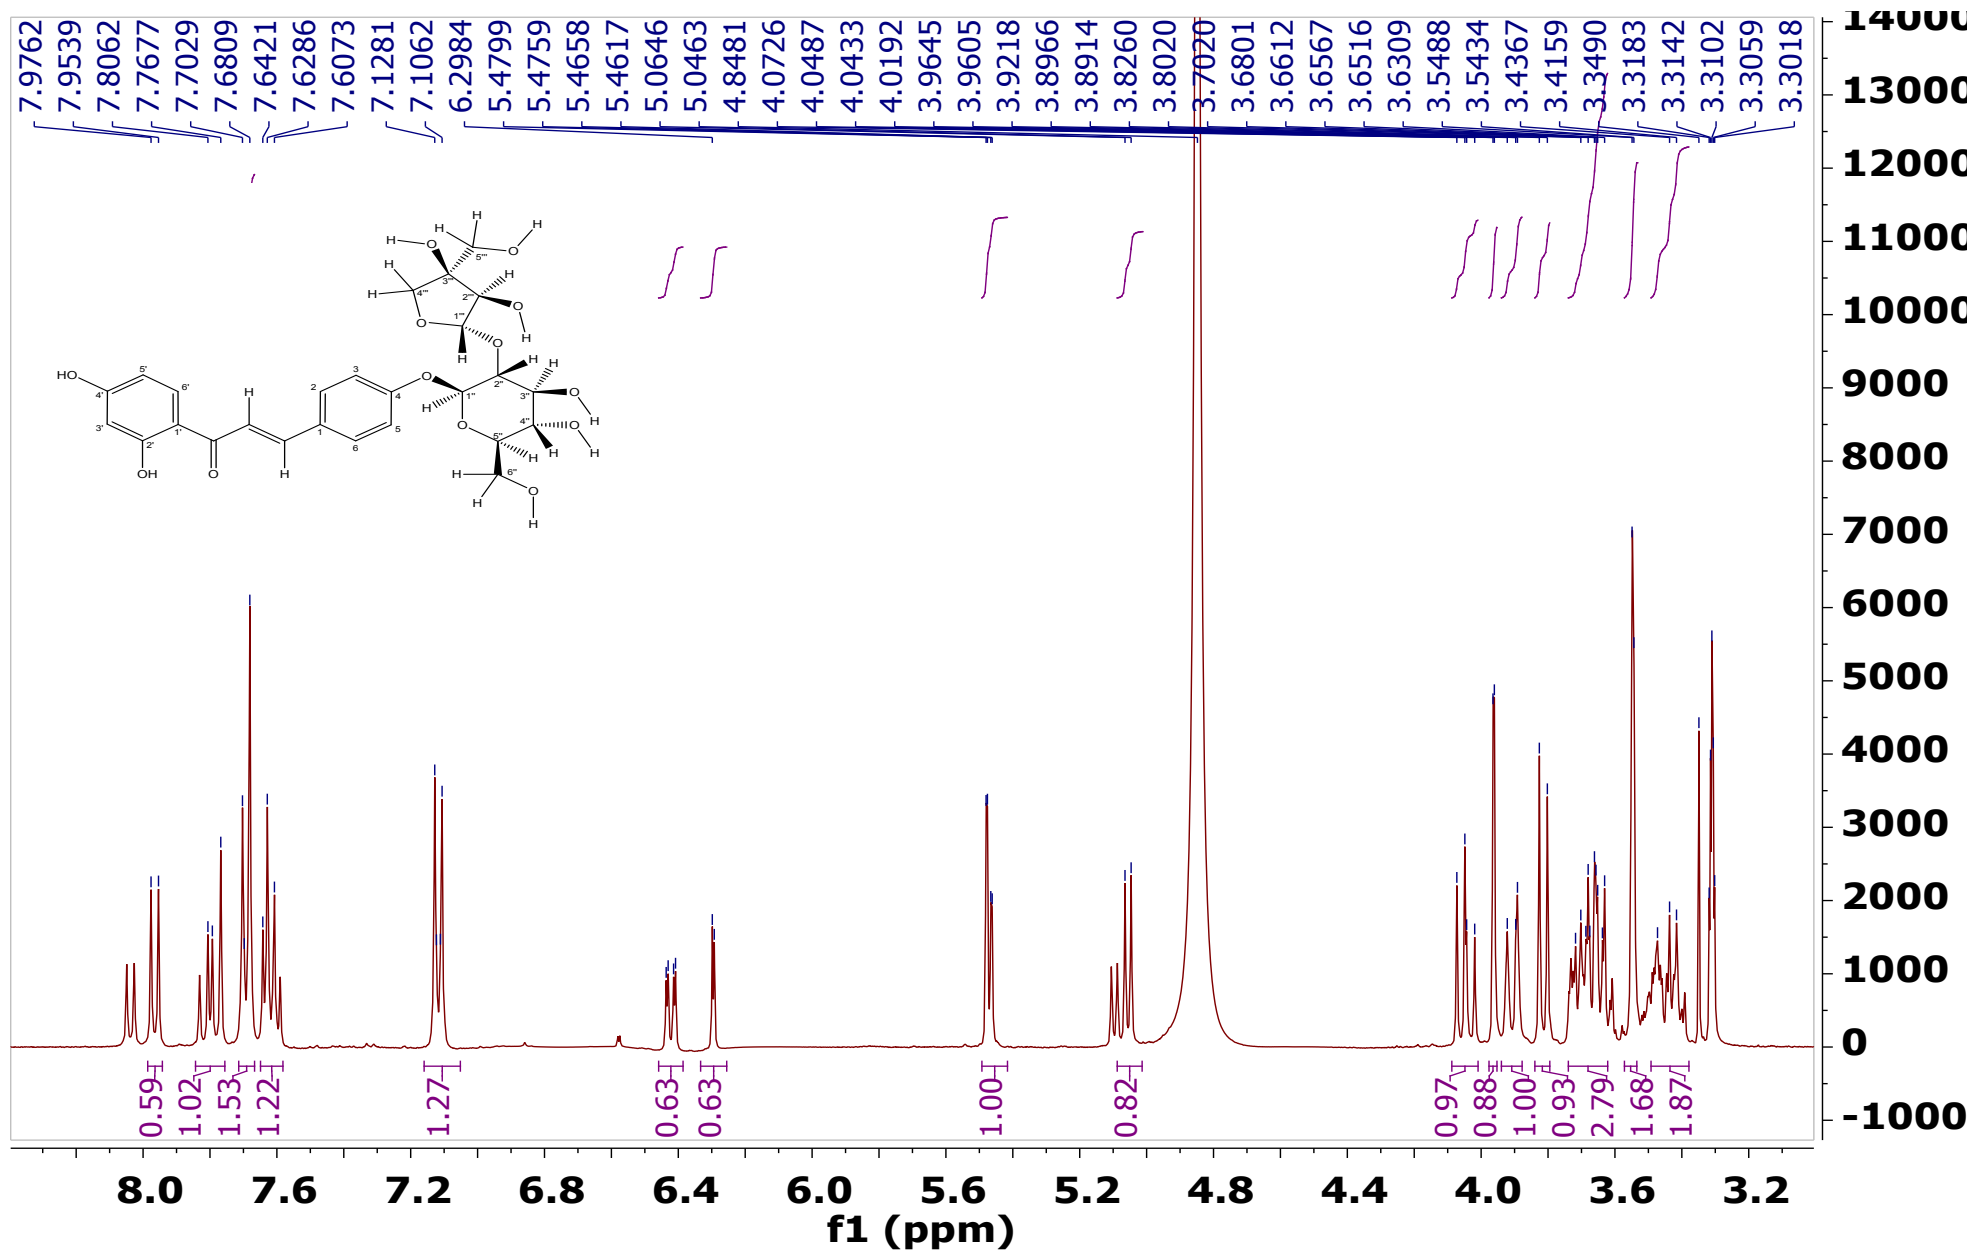

Fig. S29  $^1\text{H-NMR}$  spectrum of isoliquiritigenin-4-O- $\beta$ -D-aposylglucoside (10) in  $\text{CD}_3\text{OD}$  at 400 MHz

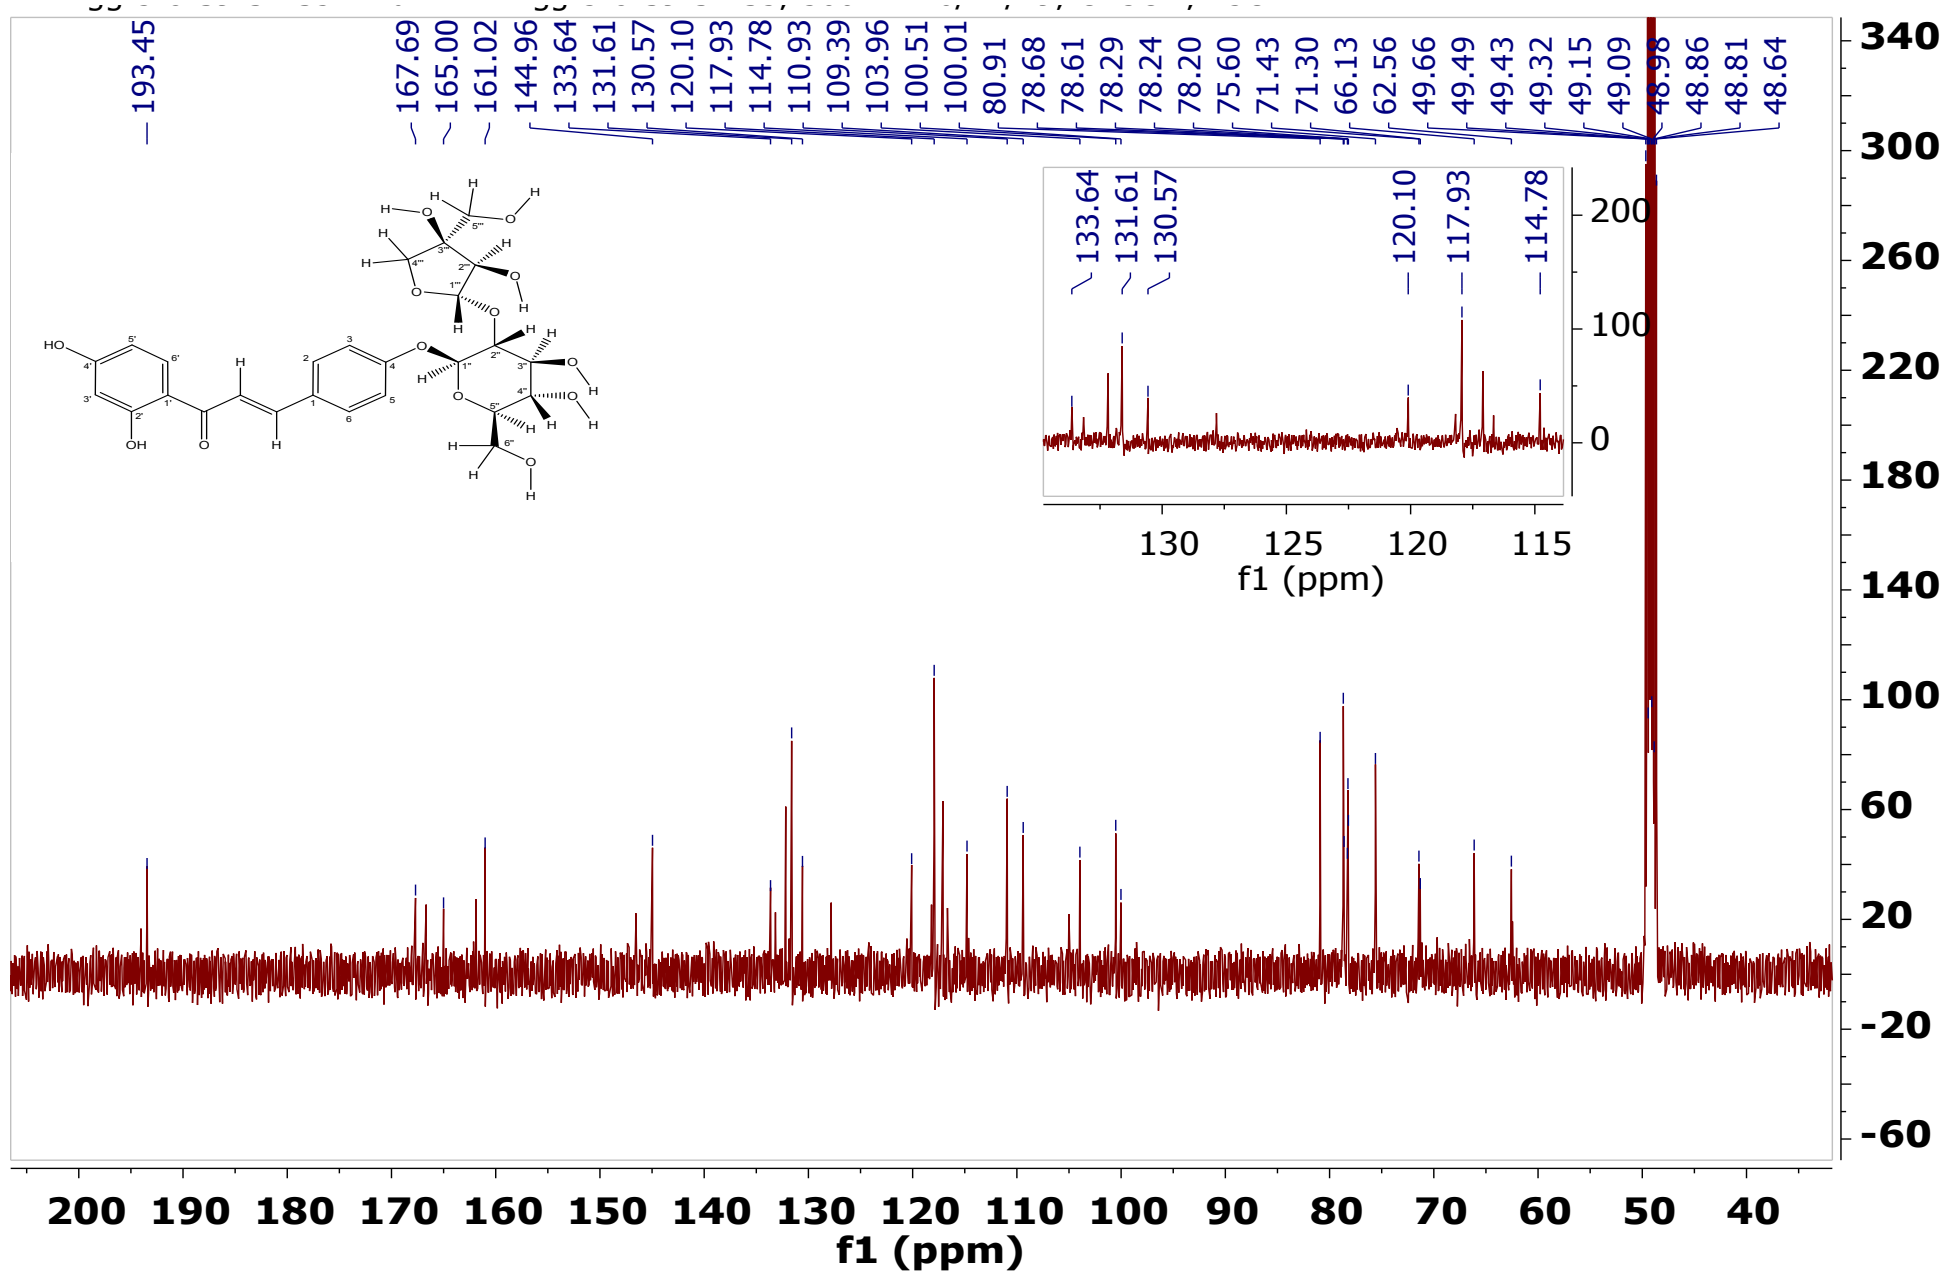

Fig. S30  $^{13}\text{C}$ -NMR spectrum of isoliquiritigenin-4-O- $\beta$ -D-apiosylglucoside (10) in  $\text{CD}_3\text{OD}$  at 125 MHz with expansion at (115- 130 ppm)

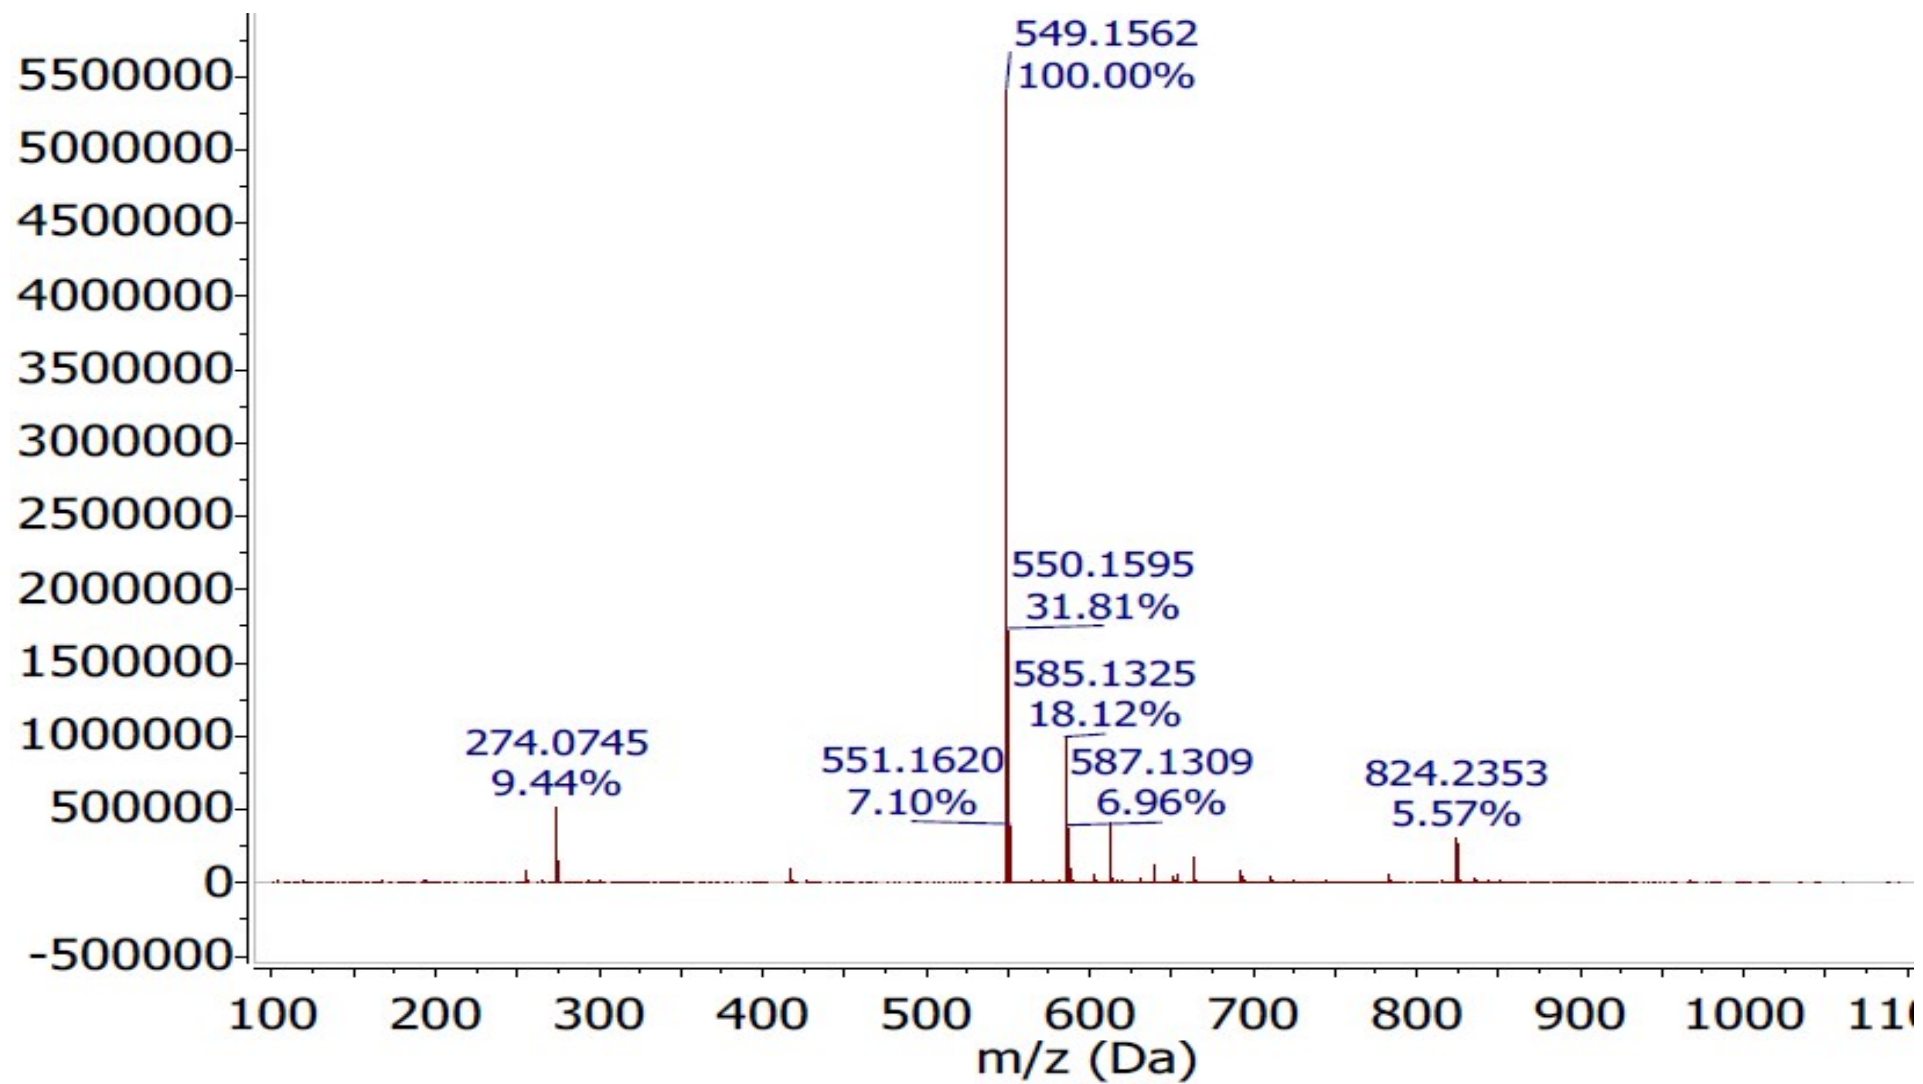

Fig. S31 HRESIMS spectrum of isoliquiritigenin-4-O-β-D-apiosylglucoside (10) in negative mode

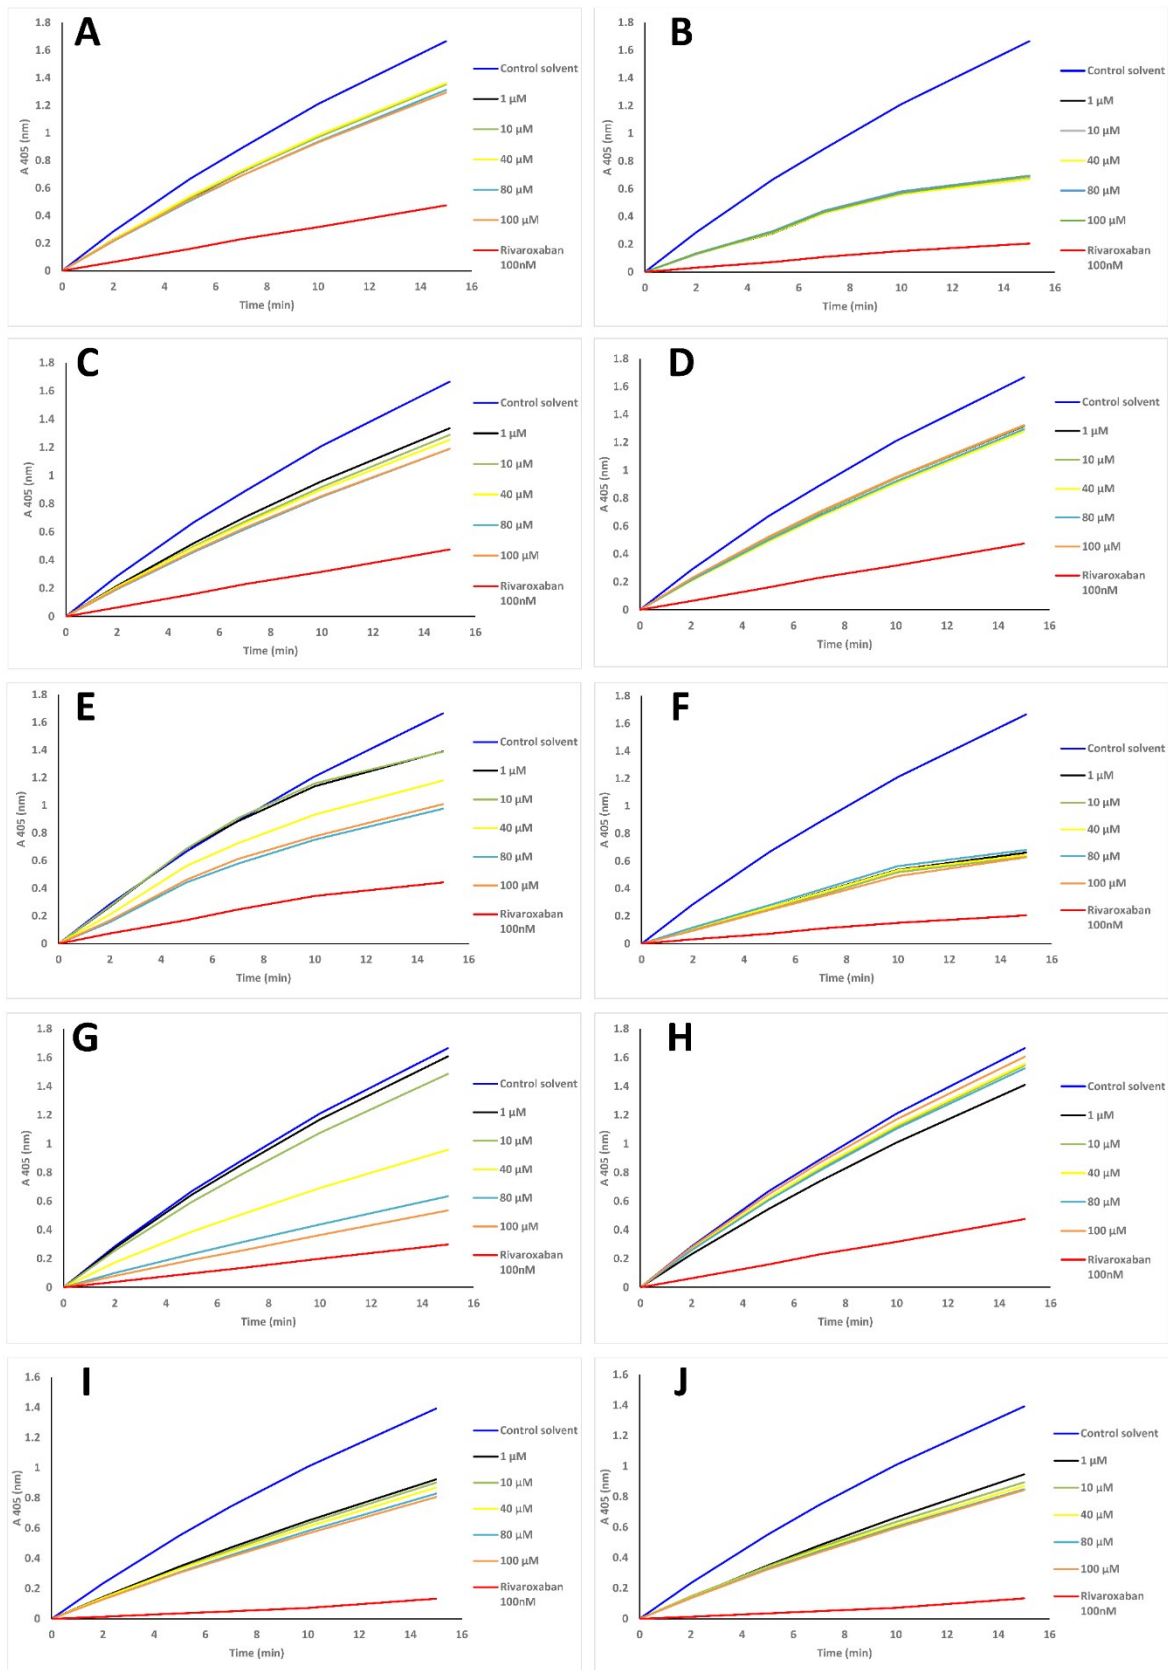

**Fig. S32** Absorbance-time curves of FXa mediated hydrolysis of chromogenic substrate using different concentrations of **A.** 7, 4'-dihydroxyflavone, **B.** 7-hydroxy-4'-methoxyisoflavone, **C.** 3-R-glabridin, **D.** isoliquirtigenin, **E.** liquirtin, **F.** naringenin 5-O-glucoside, **G.** 3,3',4,4'-tetrahydroxy-2 methoxychalcone, **H.** liquirtinapioside, **I.** licraside and **J.** isoliquirtinapioside

**Table S5. ADMET profile of compounds isolated from licorice compared to synthetic FXa inhibitors**

| No       | Compound                                 | #stars <sup>a</sup> | MW <sup>b</sup> | HBD <sup>c</sup> | HBA <sup>d</sup> | QP logPo/w <sup>e</sup> | QP logS <sup>f</sup> | QPP Caco <sup>g</sup> | CNS <sup>h</sup> | QP logBB <sup>i</sup> | QPP MDCK <sup>j</sup> | % Human Oral Absorption <sup>k</sup> | QP Log Khsa <sup>l</sup> | #metab <sup>m</sup> | QP Log HERG <sup>n</sup> | Rule Of 5 <sup>o</sup> | Rule Of 3 <sup>p</sup> |
|----------|------------------------------------------|---------------------|-----------------|------------------|------------------|-------------------------|----------------------|-----------------------|------------------|-----------------------|-----------------------|--------------------------------------|--------------------------|---------------------|--------------------------|------------------------|------------------------|
| <b>A</b> | <b>Rivaroxaban*</b>                      | 0                   | 435.881         | 1                | 10.7             | 2.245                   | -5.128               | 425.979               | -1               | -0.87                 | 837.713               | 87.151                               | -0.291                   | 3                   | -5.884                   | 0                      | 0                      |
| <b>B</b> | <b>Apixaban*</b>                         | 0                   | 459.504         | 2                | 10.25            | 2.719                   | -6.394               | 171.933               | -2               | -1.608                | 73.767                | 82.875                               | 0.314                    | 4                   | -6.326                   | 0                      | 1                      |
| <b>C</b> | <b>Edoxaban*</b>                         | 0                   | 548.058         | 1.5              | 13.5             | 1.782                   | -4.603               | 27.918                | -2               | -1.347                | 59.787                | 37.343                               | -0.324                   | 6                   | -5.585                   | 2                      | 0                      |
| <b>D</b> | <b>Betrixaban*</b>                       | 0                   | 451.911         | 2                | 7.25             | 4.048                   | -5.424               | 503.108               | -2               | -1.112                | 512.497               | 100                                  | 0.424                    | 2                   | -5.84                    | 0                      | 0                      |
| 1        | 7, 4'-Dihydroxyflavone                   | 0                   | 254.242         | 2                | 4                | 1.817                   | -3.271               | 269.304               | -2               | -1.031                | 119.815               | <b>81.084</b>                        | -0.073                   | 2                   | -5.247                   | 0                      | 0                      |
| 2        | 7-hydroxy-4'-methoxyisoflavone           | 0                   | 268.268         | 1                | 4                | 2.585                   | -3.422               | <b>1274.915</b>       | 0                | -0.448                | 643.225               | <b>100</b>                           | 0.019                    | 2                   | -5.133                   | 0                      | 0                      |
| 3        | 3-R- Glabridin                           | 0                   | 380.483         | 2                | 3                | 5.096                   | -6.465               | <b>1891.682</b>       | 0                | -0.269                | 985.349               | <b>100</b>                           | 1.133                    | 3                   | -5.129                   | 1                      | 1                      |
| 4        | Isoliquiritigenin                        | 0                   | 256.257         | 2                | 3.25             | 2.074                   | -3.078               | 174.841               | -2               | -1.562                | 75.117                | <b>79.226</b>                        | -0.084                   | 3                   | -5.389                   | 0                      | 0                      |
| 5        | Liquiritin                               | 0                   | 418.399         | 5                | 12.75            | -0.31                   | -3.232               | 21.721                | -2               | -2.737                | 7.883                 | 49.06                                | -0.711                   | 7                   | -5.672                   | 0                      | 2                      |
| 6        | Naringenin 5-O-glucoside                 | 0                   | 434.399         | 6                | 13.5             | -0.7                    | -2.996               | 17.242                | -2               | -2.898                | 6.142                 | 32.022                               | -0.823                   | 8                   | -5.587                   | 1                      | 2                      |
| 7        | 3,3',4,4'-Tetrahydroxy-2-methoxychalcone | 0                   | 302.283         | 4                | 5.75             | 0.949                   | -2.657               | 58.255                | -2               | -2.183                | 22.899                | <b>64.096</b>                        | -0.419                   | 5                   | -5.105                   | 0                      | 0                      |
| 8        | Liquiritin apioside                      | 6                   | 550.515         | 7                | 18.6             | -1.293                  | -2.999               | 7.111                 | -2               | -3.791                | 2.358                 | 0                                    | -1.166                   | 9                   | -6.073                   | 3                      | 2                      |
| 9        | Licraside                                | 7                   | 550.515         | 7                | 17.6             | -1.054                  | -2.294               | 4.771                 | -2               | -4.231                | 1.532                 | 0                                    | -1.238                   | 8                   | -6.056                   | 3                      | 2                      |
| 10       | Isoliquirtin apioside                    | 7                   | 550.515         | 7                | 17.6             | -1.036                  | -2.318               | 4.621                 | -2               | -4.246                | 1.48                  | 0                                    | -1.228                   | 8                   | -6.043                   | 3                      | 2                      |

**\*Synthetic FXa inhibitors**

- a) ADME-compliance score – druglikeness parameter (range 0 to 5). b) Molecular Weight of the molecule (range: 130.0 to 725.0)  
c) Hydrogen Bond Donor (range: 0.0 to 6.0). d) Hydrogen Bond Acceptor (range: 2.0 to 20.0)  
e) Predicted octanol/water partition coefficient (range: -2.0 to 6.5). f) Predicted aqueous solubility (range: -6.5 to 0.5)  
g) Predicted Caco cell permeability (range: < 25 is poor and >500 is great). h) Predicted central nervous system activity (-2 (inactive) to +2 (active)).  
i) Predicted brain/blood partition coefficient (range: -3.0 to 1.2). j) Predicted apparent MDCK cell permeability (range: < 25 is poor and >500 is great).  
k) Percentage of human oral absorption (range: <25 is poor and >80% is high). L) Prediction of binding to human serum albumin (range: -1.5 to 1.5).  
m) Number of likely metabolic reactions (range: 1 to 8). n) Predicted IC<sub>50</sub> value for blockage of HERG K<sup>+</sup> channels (concern < -5).  
o) Number of violations of Lipinski's rule of five (maximum is 4). p) Number of violations of Jorgensen's rule of three (maximum is 3).
